# Supplementary material for: SWI/SNF Complex Genomic Alterations as a Predictive Biomarker for Response to Immune Checkpoint Inhibitors in Multiple Cancers
Source: Oxford University Press journal article supplement (doi:10.1158/2326-6066.cir-22-0813), 2023-02-27
Supplement: cir-22-0813_supplementary_tables_suppst1-st12.xlsx [file cir-22-0813_supplementary_tables_suppst1-st12.xlsx]

## Sheet: S1 cohort_information
Supplementary Table S1. Information of the cohorts used in this study.
Cohort	Cancer type	Drug type	Overall patients	Exclusions	Eligible patiens	Collect time	Data source
TMB MSKCC 2018	pan-cancer	ICI	1661	31 (OS time=0)	1630	-	cbioportal
Mixed Allen 2018	melanoma	ICI	151	-	151	-	cbioportal
MEL DFCI 2019	melanoma	anti-PD1 ICI (nivolumab or pembrolizumab)	144	-	144	January 2013 to June 2016	cbioportal
SKCM DFCI 2015	melanoma	anti-CTLA4 ICI (ipilimumab)	110	-	110	-	cbioportal
ccRCC DFCI 2020	clear cell renal cell carcinoma	anti-PD1 ICI (nivolumab)	261	-	261	-	Original report
GIC PUCH 2021	gastrointestinal cancer	ICI	92	-	92	August 2015 to May 2019	Original report
NSCLC MSKCC 2018	non-small cell lung cancer	anti-PD1 plus anti-CTLA4 ICI (nivolumab and ipilimumab)	75	patient #4 (whose tissue was collected 122 days after ICI therapy)	74	February 2013 to March 2015	cbioportal

## Sheet: S2 TMB_MSKCC_2018
Supplementary Table S2. Clinical information of patients in the TMB MSKCC 2018 cohort.
#1: Altered; 0: Unaltered
PATIENT_ID	SEX	AGE	DRUG_TYPE	CANCER_TYPE	TMB_NONSYNONYMOUS	OS_MONTHS	OS_STATUS	ARID1A#	ARID1B	ARID2	PBRM1	SMARCA4	SMARCD1	SMARCB1	SWI/SNF_Alteration(7genes)
P-0000062	Male	80	PD-1/PDL-1	Esophagogastric Cancer	6.65493	1	1	0	0	0	0	0	0	0	Unaltered
P-0000063	Male	62	PD-1/PDL-1	Bladder Cancer	15.5282	42	0	0	0	0	0	0	0	0	Unaltered
P-0000071	Male	66	PD-1/PDL-1	Bladder Cancer	9.9824	43	0	0	0	0	0	0	0	0	Unaltered
P-0000082	Male	61	PD-1/PDL-1	Non-Small Cell Lung Cancer	13.3099	57	0	0	0	0	0	0	0	0	Unaltered
P-0000088	Male	63	PD-1/PDL-1	Bladder Cancer	12.2007	12	1	1	0	0	0	0	0	0	Altered
P-0000103	Male	47	Combo	Esophagogastric Cancer	6.65493	18	1	0	0	0	0	0	0	1	Altered
P-0000121	Male	44	PD-1/PDL-1	Esophagogastric Cancer	3.32747	4	0	0	0	0	0	0	0	0	Unaltered
P-0000165	Female	67	PD-1/PDL-1	Non-Small Cell Lung Cancer	5.54578	1	1	0	0	0	0	0	0	0	Unaltered
P-0000184	Male	60	PD-1/PDL-1	Bladder Cancer	8.87324	8	0	0	0	0	0	0	0	0	Unaltered
P-0000205	Female	56	Combo	Non-Small Cell Lung Cancer	5.54578	2	1	0	0	0	0	0	0	0	Unaltered
P-0000208	Female	69	PD-1/PDL-1	Non-Small Cell Lung Cancer	2.21831	13	1	0	0	0	0	0	0	0	Unaltered
P-0000222	Male	64	PD-1/PDL-1	Bladder Cancer	13.3099	8	1	0	1	0	0	0	0	0	Altered
P-0000223	Female	29	PD-1/PDL-1	Glioma	5.54578	2	1	0	0	0	0	0	0	0	Unaltered
P-0000227	Female	60	PD-1/PDL-1	Head and Neck Cancer	0	7	0	0	0	0	0	0	0	0	Unaltered
P-0000235	Male	76	PD-1/PDL-1	Non-Small Cell Lung Cancer	8.87324	3	1	0	0	0	0	0	0	0	Unaltered
P-0000247	Female	50	Combo	Breast Cancer	2.21831	17	0	0	0	0	0	0	0	0	Unaltered
P-0000249	Male	61	PD-1/PDL-1	Esophagogastric Cancer	1.10916	3	1	0	0	0	0	0	0	0	Unaltered
P-0000268	Male	49	PD-1/PDL-1	Bladder Cancer	5.54578	35	0	0	0	0	0	0	0	0	Unaltered
P-0000277	Female	58	PD-1/PDL-1	Cancer of Unknown Primary	0	30	1	0	0	0	0	0	0	0	Unaltered
P-0000302	Male	65	PD-1/PDL-1	Non-Small Cell Lung Cancer	1.10916	15	0	0	0	0	0	0	0	0	Unaltered
P-0000350	Female	22	Combo	Renal Cell Carcinoma	0	26	1	0	0	0	0	0	0	0	Unaltered
P-0000363	Male	71	PD-1/PDL-1	Non-Small Cell Lung Cancer	12.2007	2	1	0	0	0	0	0	0	0	Unaltered
P-0000369	Female	52	Combo	Esophagogastric Cancer	1.10916	17	1	1	0	0	0	0	0	0	Altered
P-0000392	Female	40	PD-1/PDL-1	Breast Cancer	3.32747	3	1	0	0	0	0	0	0	0	Unaltered
P-0000422	Female	52	CTLA4	Breast Cancer	6.65493	1	1	0	0	0	0	0	0	0	Unaltered
P-0000423	Male	61	PD-1/PDL-1	Bladder Cancer	18.8556	39	0	0	0	0	0	0	0	0	Unaltered
P-0000444	Male	61	PD-1/PDL-1	Esophagogastric Cancer	5.54578	2	1	0	0	0	0	0	0	0	Unaltered
P-0000447	Female	36	Combo	Breast Cancer	3.32747	12	1	0	0	0	0	0	0	0	Unaltered
P-0000454	Male	71	PD-1/PDL-1	Head and Neck Cancer	2.21831	9	0	0	0	0	0	0	0	0	Unaltered
P-0000458	Male	66	PD-1/PDL-1	Non-Small Cell Lung Cancer	1.10916	5	1	0	0	0	0	0	0	0	Unaltered
P-0000535	Female	76	PD-1/PDL-1	Bladder Cancer	26.6197	21	0	0	0	1	0	0	0	0	Altered
P-0000544	Male	81	PD-1/PDL-1	Bladder Cancer	0	5	1	0	0	0	0	0	0	0	Unaltered
P-0000547	Female	62	PD-1/PDL-1	Breast Cancer	6.65493	3	1	0	0	0	0	0	0	0	Unaltered
P-0000553	Male	51	Combo	Esophagogastric Cancer	6.65493	8	1	0	0	0	0	0	0	0	Unaltered
P-0000563	Male	42	PD-1/PDL-1	Non-Small Cell Lung Cancer	3.32747	6	1	0	0	0	0	0	0	0	Unaltered
P-0000596	Male	71	CTLA4	Melanoma	42.1479	42	0	0	0	0	1	0	0	0	Altered
P-0000604	Male	59	Combo	Non-Small Cell Lung Cancer	4.43662	57	0	0	0	0	0	0	0	0	Unaltered
P-0000621	Male	44	PD-1/PDL-1	Head and Neck Cancer	4.43662	7	1	0	0	0	0	0	0	0	Unaltered
P-0000628	Male	52	PD-1/PDL-1	Non-Small Cell Lung Cancer	4.43662	2	1	0	0	0	0	0	0	0	Unaltered
P-0000638	Female	35	CTLA4	Breast Cancer	0	1	1	0	0	0	0	0	0	0	Unaltered
P-0000646	Male	79	CTLA4	Melanoma	41.0387	77	0	0	0	0	0	0	0	0	Unaltered
P-0000670	Female	50	Combo	Non-Small Cell Lung Cancer	6.65493	17	0	0	0	0	0	0	0	0	Unaltered
P-0000681	Female	67	PD-1/PDL-1	Non-Small Cell Lung Cancer	18.8556	28	0	0	1	0	0	0	0	0	Altered
P-0000682	Male	62	PD-1/PDL-1	Colorectal Cancer	13.3099	17	0	0	0	0	0	0	0	0	Unaltered
P-0000686	Male	78	CTLA4	Melanoma	179.683	80	0	1	0	1	0	0	0	0	Altered
P-0000697	Female	75	Combo	Melanoma	7.76409	32	1	0	0	0	0	0	0	0	Unaltered
P-0000699	Male	43	Combo	Colorectal Cancer	5.54578	3	0	0	0	0	0	0	0	0	Unaltered
P-0000702	Female	85	PD-1/PDL-1	Non-Small Cell Lung Cancer	6.65493	2	0	0	0	0	0	0	0	0	Unaltered
P-0000704	Female	49	CTLA4	Breast Cancer	9.9824	1	1	0	0	0	0	0	0	0	Unaltered
P-0000721	Female	59	PD-1/PDL-1	Colorectal Cancer	7.76409	4	1	0	0	0	0	0	0	0	Unaltered
P-0000731	Female	73	PD-1/PDL-1	Non-Small Cell Lung Cancer	6.65493	42	0	0	0	0	0	0	0	0	Unaltered
P-0000739	Male	79	PD-1/PDL-1	Colorectal Cancer	7.76409	31	1	0	0	0	0	1	1	0	Altered
P-0000740	Female	69	PD-1/PDL-1	Renal Cell Carcinoma	5.54578	24	0	0	0	0	0	0	0	0	Unaltered
P-0000746	Male	72	PD-1/PDL-1	Bladder Cancer	14.419	6	1	0	0	0	0	0	0	0	Unaltered
P-0000749	Male	28	PD-1/PDL-1	Glioma	8.87324	13	0	0	0	0	0	0	0	0	Unaltered
P-0000758	Male	52	PD-1/PDL-1	Glioma	3.32747	14	1	0	0	0	0	0	0	0	Unaltered
P-0000762	Male	67	PD-1/PDL-1	Colorectal Cancer	4.43662	17	1	0	0	0	0	0	0	0	Unaltered
P-0000768	Male	58	PD-1/PDL-1	Head and Neck Cancer	4.43662	35	1	0	0	0	0	0	0	0	Unaltered
P-0000793	Male	54	PD-1/PDL-1	Esophagogastric Cancer	3.91488	5	1	0	0	0	0	0	0	0	Unaltered
P-0000818	Male	33	PD-1/PDL-1	Glioma	4.43662	14	1	0	0	0	0	0	0	0	Unaltered
P-0000872	Male	78	PD-1/PDL-1	Bladder Cancer	0	10	1	0	0	0	0	0	0	0	Unaltered
P-0000891	Male	80	PD-1/PDL-1	Bladder Cancer	11.0916	11	1	0	0	0	1	0	0	0	Altered
P-0000893	Male	90	CTLA4	Melanoma	6.65493	16	1	0	0	0	0	0	0	0	Unaltered
P-0000894	Male	80	PD-1/PDL-1	Non-Small Cell Lung Cancer	5.54578	57	0	0	0	1	0	0	0	0	Altered
P-0000895	Male	67	Combo	Melanoma	6.65493	33	1	0	0	0	0	0	0	0	Unaltered
P-0000898	Male	54	CTLA4	Melanoma	5.54578	21	1	0	0	0	0	0	0	0	Unaltered
P-0000922	Male	51	CTLA4	Melanoma	4.43662	17	1	0	0	0	0	0	0	0	Unaltered
P-0000938	Male	70	Combo	Esophagogastric Cancer	3.32747	13	1	1	0	0	0	0	0	0	Altered
P-0000940	Female	67	PD-1/PDL-1	Colorectal Cancer	9.9824	10	1	1	0	0	0	0	0	0	Altered
P-0000958	Female	16	CTLA4	Melanoma	2.21831	35	0	0	0	0	0	0	0	0	Unaltered
P-0000968	Male	70	Combo	Melanoma	3.32747	48	0	0	0	0	0	0	0	0	Unaltered
P-0000977	Male	65	Combo	Esophagogastric Cancer	7.76409	2	1	0	0	0	0	0	0	0	Unaltered
P-0000978	Female	58	PD-1/PDL-1	Non-Small Cell Lung Cancer	1.10916	7	1	0	0	0	0	0	0	0	Unaltered
P-0001029	Male	56	CTLA4	Melanoma	2.21831	30	1	0	0	0	0	0	0	0	Unaltered
P-0001052	Female	63	PD-1/PDL-1	Glioma	3.32747	8	1	0	0	0	0	0	0	0	Unaltered
P-0001074	Male	60	PD-1/PDL-1	Bladder Cancer	21.074	19	1	0	0	0	0	0	0	0	Unaltered
P-0001081	Female	52	CTLA4	Melanoma	45.4754	45	0	1	0	0	0	0	0	0	Altered
P-0001093	Male	65	Combo	Non-Small Cell Lung Cancer	12.2007	42	0	0	1	0	0	0	0	0	Altered
P-0001121	Female	45	PD-1/PDL-1	Non-Small Cell Lung Cancer	1.10916	10	1	0	0	0	0	0	0	0	Unaltered
P-0001135	Male	58	PD-1/PDL-1	Bladder Cancer	4.43662	27	1	0	0	0	0	0	0	0	Unaltered
P-0001144	Male	64	PD-1/PDL-1	Non-Small Cell Lung Cancer	7.76409	2	1	0	0	0	0	0	0	0	Unaltered
P-0001170	Male	65	PD-1/PDL-1	Colorectal Cancer	8.87324	13	1	1	0	0	0	0	0	0	Altered
P-0001171	Male	52	PD-1/PDL-1	Non-Small Cell Lung Cancer	96.4965	29	0	0	0	1	0	0	0	0	Altered
P-0001174	Female	77	CTLA4	Melanoma	1.10916	70	0	0	0	0	0	0	0	0	Unaltered
P-0001179	Female	50	PD-1/PDL-1	Melanoma	3.32747	6	1	0	0	0	0	0	0	0	Unaltered
P-0001186	Male	69	PD-1/PDL-1	Head and Neck Cancer	1.10916	6	1	0	0	0	0	0	0	0	Unaltered
P-0001199	Female	76	PD-1/PDL-1	Non-Small Cell Lung Cancer	14.419	2	1	0	0	0	0	0	0	0	Unaltered
P-0001223	Male	63	Combo	Bladder Cancer	7.76409	3	1	0	0	0	0	0	0	0	Unaltered
P-0001232	Male	62	PD-1/PDL-1	Renal Cell Carcinoma	4.43662	23	0	0	0	0	1	0	0	0	Altered
P-0001260	Female	23	PD-1/PDL-1	Esophagogastric Cancer	3.32747	1	1	0	0	0	0	0	0	0	Unaltered
P-0001268	Male	62	PD-1/PDL-1	Bladder Cancer	4.43662	9	1	0	0	0	0	0	0	0	Unaltered
P-0001296	Female	70	PD-1/PDL-1	Non-Small Cell Lung Cancer	3.32747	2	1	0	0	0	0	0	0	0	Unaltered
P-0001298	Male	59	PD-1/PDL-1	Esophagogastric Cancer	5.54578	9	1	0	0	0	0	0	0	0	Unaltered
P-0001312	Female	58	PD-1/PDL-1	Breast Cancer	2.21831	3	1	0	0	0	0	0	0	0	Unaltered
P-0001314	Female	44	PD-1/PDL-1	Non-Small Cell Lung Cancer	2.21831	1	1	0	0	0	0	0	0	0	Unaltered
P-0001361	Male	73	CTLA4	Melanoma	34.3838	42	1	0	0	0	0	0	0	0	Unaltered
P-0001365	Male	70	PD-1/PDL-1	Non-Small Cell Lung Cancer	5.54578	2	1	0	0	0	0	0	0	0	Unaltered
P-0001371	Male	46	PD-1/PDL-1	Colorectal Cancer	0	10	1	0	0	0	0	0	0	0	Unaltered
P-0001385	Female	51	Combo	Non-Small Cell Lung Cancer	14.419	40	0	0	0	0	0	0	0	0	Unaltered
P-0001388	Male	77	PD-1/PDL-1	Glioma	5.54578	16	1	0	0	0	0	0	0	0	Unaltered
P-0001400	Female	34	PD-1/PDL-1	Glioma	5.54578	3	1	0	0	0	0	0	0	0	Unaltered
P-0001406	Female	65	PD-1/PDL-1	Glioma	2.21831	3	1	0	0	0	0	0	0	0	Unaltered
P-0001408	Male	55	Combo	Glioma	3.32747	4	0	0	0	0	0	0	0	0	Unaltered
P-0001420	Female	57	PD-1/PDL-1	Glioma	38.8204	4	1	0	0	1	0	1	0	1	Altered
P-0001437	Female	65	PD-1/PDL-1	Non-Small Cell Lung Cancer	1.10916	4	1	0	0	0	0	0	0	0	Unaltered
P-0001485	Male	71	CTLA4	Melanoma	74.3134	7	1	0	0	0	0	1	0	0	Altered
P-0001495	Male	56	PD-1/PDL-1	Esophagogastric Cancer	6.65493	17	1	0	0	0	0	0	0	0	Unaltered
P-0001531	Male	40	PD-1/PDL-1	Colorectal Cancer	4.43662	12	0	0	0	0	0	0	0	0	Unaltered
P-0001538	Male	54	PD-1/PDL-1	Head and Neck Cancer	4.43662	6	1	0	0	0	0	0	0	0	Unaltered
P-0001543	Male	50	Combo	Esophagogastric Cancer	4.43662	15	1	0	0	0	0	0	0	0	Unaltered
P-0001560	Male	65	CTLA4	Melanoma	24.4014	43	0	1	0	1	0	0	0	0	Altered
P-0001578	Male	78	PD-1/PDL-1	Bladder Cancer	11.0916	3	1	0	0	0	0	0	0	0	Unaltered
P-0001586	Male	58	PD-1/PDL-1	Esophagogastric Cancer	5.87232	11	0	0	0	0	0	0	0	0	Unaltered
P-0001591	Male	17	PD-1/PDL-1	Glioma	2.21831	15	1	0	0	0	0	0	0	0	Unaltered
P-0001598	Male	76	PD-1/PDL-1	Head and Neck Cancer	11.0916	34	0	0	0	0	0	0	0	0	Unaltered
P-0001603	Male	61	CTLA4	Melanoma	22.1831	40	0	0	0	0	0	0	0	0	Unaltered
P-0001633	Female	55	PD-1/PDL-1	Non-Small Cell Lung Cancer	4.43662	1	1	0	0	0	0	0	0	0	Unaltered
P-0001646	Female	61	CTLA4	Melanoma	1.10916	10	1	0	0	0	0	0	0	0	Unaltered
P-0001665	Female	48	PD-1/PDL-1	Non-Small Cell Lung Cancer	1.10916	5	1	0	0	0	0	0	0	0	Unaltered
P-0001669	Male	60	CTLA4	Melanoma	1.10916	5	1	0	0	0	0	0	0	0	Unaltered
P-0001679	Male	69	CTLA4	Melanoma	5.54578	4	1	0	0	0	0	0	0	0	Unaltered
P-0001693	Female	53	PD-1/PDL-1	Colorectal Cancer	9.9824	2	1	0	0	0	0	0	0	0	Unaltered
P-0001702	Female	48	PD-1/PDL-1	Colorectal Cancer	5.54578	9	1	0	0	0	0	0	0	0	Unaltered
P-0001706	Male	45	PD-1/PDL-1	Melanoma	22.1831	15	1	0	0	1	0	0	0	0	Altered
P-0001710	Male	64	CTLA4	Melanoma	16.6373	40	0	0	0	0	0	0	0	0	Unaltered
P-0001731	Male	26	PD-1/PDL-1	Glioma	5.54578	31	1	0	0	0	0	0	0	0	Unaltered
P-0001733	Male	70	Combo	Esophagogastric Cancer	4.43662	13	0	0	0	0	0	0	0	0	Unaltered
P-0001756	Male	74	CTLA4	Melanoma	44.3662	40	0	0	0	1	0	0	0	0	Altered
P-0001771	Female	44	PD-1/PDL-1	Colorectal Cancer	4.43662	10	1	0	0	0	0	0	0	0	Unaltered
P-0001785	Female	43	PD-1/PDL-1	Breast Cancer	2.21831	13	0	0	0	0	0	0	0	0	Unaltered
P-0001794	Male	63	PD-1/PDL-1	Head and Neck Cancer	3.32747	4	1	0	0	0	0	0	0	0	Unaltered
P-0001807	Male	71	PD-1/PDL-1	Colorectal Cancer	5.54578	2	1	0	0	0	0	0	0	0	Unaltered
P-0001808	Male	58	PD-1/PDL-1	Colorectal Cancer	176.356	10	0	1	0	1	0	0	0	0	Altered
P-0001832	Female	68	PD-1/PDL-1	Non-Small Cell Lung Cancer	4.43662	3	1	0	0	0	0	1	0	0	Altered
P-0001836	Female	60	PD-1/PDL-1	Non-Small Cell Lung Cancer	25.5106	6	0	1	0	0	0	0	0	0	Altered
P-0001841	Male	62	Combo	Melanoma	7.76409	3	1	0	0	0	0	0	0	0	Unaltered
P-0001843	Female	63	PD-1/PDL-1	Glioma	4.43662	7	0	0	0	0	0	0	0	0	Unaltered
P-0001850	Male	71	PD-1/PDL-1	Esophagogastric Cancer	1.10916	17	0	1	0	0	0	0	0	0	Altered
P-0001855	Male	64	Combo	Esophagogastric Cancer	4.43662	9	0	0	0	0	0	0	0	0	Unaltered
P-0001867	Male	70	PD-1/PDL-1	Colorectal Cancer	14.419	9	1	0	0	1	1	0	0	0	Altered
P-0001871	Female	60	PD-1/PDL-1	Bladder Cancer	5.54578	2	1	0	0	0	0	0	0	0	Unaltered
P-0001882	Male	55	PD-1/PDL-1	Glioma	34.3838	23	0	0	1	1	1	0	0	0	Altered
P-0001892	Male	86	CTLA4	Melanoma	4.43662	4	1	0	0	0	0	0	0	0	Unaltered
P-0001904	Female	72	PD-1/PDL-1	Bladder Cancer	5.54578	1	1	0	0	0	0	0	0	0	Unaltered
P-0001955	Female	31	PD-1/PDL-1	Non-Small Cell Lung Cancer	2.21831	6	1	0	0	0	0	0	0	0	Unaltered
P-0001977	Male	80	PD-1/PDL-1	Non-Small Cell Lung Cancer	9.9824	4	1	1	0	0	0	0	0	0	Altered
P-0002015	Female	44	PD-1/PDL-1	Glioma	1.10916	8	1	0	0	0	0	0	0	0	Unaltered
P-0002018	Female	36	Combo	Melanoma	4.43662	4	1	0	0	0	0	0	0	0	Unaltered
P-0002019	Male	80	PD-1/PDL-1	Melanoma	1.10916	7	0	0	0	0	0	0	0	0	Unaltered
P-0002028	Female	65	PD-1/PDL-1	Non-Small Cell Lung Cancer	6.65493	33	0	0	0	0	0	0	1	0	Altered
P-0002041	Female	62	PD-1/PDL-1	Breast Cancer	0	4	1	0	0	0	0	0	0	0	Unaltered
P-0002042	Male	47	PD-1/PDL-1	Colorectal Cancer	11.0916	7	1	1	0	0	1	0	0	0	Altered
P-0002049	Female	33	PD-1/PDL-1	Colorectal Cancer	54.3486	39	0	1	1	0	0	0	0	0	Altered
P-0002151	Female	71	PD-1/PDL-1	Non-Small Cell Lung Cancer	9.9824	25	0	0	0	0	0	0	0	0	Unaltered
P-0002160	Male	67	PD-1/PDL-1	Non-Small Cell Lung Cancer	13.3099	6	1	0	0	0	0	1	0	0	Altered
P-0002165	Male	63	Combo	Melanoma	2.21831	22	0	0	0	0	0	0	0	0	Unaltered
P-0002181	Male	48	PD-1/PDL-1	Glioma	2.21831	9	1	0	0	0	0	0	0	0	Unaltered
P-0002182	Female	71	Combo	Melanoma	0	22	1	0	0	0	0	0	0	0	Unaltered
P-0002185	Male	51	PD-1/PDL-1	Head and Neck Cancer	5.54578	10	1	0	0	0	0	0	0	0	Unaltered
P-0002193	Male	63	PD-1/PDL-1	Head and Neck Cancer	0	11	1	0	0	0	0	0	0	0	Unaltered
P-0002225	Male	72	PD-1/PDL-1	Non-Small Cell Lung Cancer	1.10916	17	1	0	0	0	0	0	0	0	Unaltered
P-0002247	Female	69	PD-1/PDL-1	Non-Small Cell Lung Cancer	21.074	19	1	1	0	0	0	0	0	0	Altered
P-0002255	Female	63	PD-1/PDL-1	Renal Cell Carcinoma	3.32747	39	0	0	0	0	1	0	0	0	Altered
P-0002265	Male	68	PD-1/PDL-1	Glioma	1.10916	21	0	0	0	0	0	0	0	0	Unaltered
P-0002270	Male	33	PD-1/PDL-1	Renal Cell Carcinoma	4.43662	16	0	0	0	0	0	0	0	0	Unaltered
P-0002279	Female	70	PD-1/PDL-1	Non-Small Cell Lung Cancer	7.76409	3	1	1	0	0	0	0	0	0	Altered
P-0002292	Male	70	PD-1/PDL-1	Bladder Cancer	13.3099	15	1	1	0	0	0	0	0	0	Altered
P-0002295	Female	77	PD-1/PDL-1	Non-Small Cell Lung Cancer	4.43662	25	1	0	0	0	0	0	0	0	Unaltered
P-0002305	Male	80	CTLA4	Melanoma	9.9824	14	0	0	0	0	0	0	0	0	Unaltered
P-0002311	Male	59	Combo	Bladder Cancer	17.7465	39	0	1	0	0	0	0	0	0	Altered
P-0002320	Male	57	PD-1/PDL-1	Non-Small Cell Lung Cancer	6.65493	8	1	0	0	0	0	0	0	0	Unaltered
P-0002332	Female	76	PD-1/PDL-1	Cancer of Unknown Primary	4.43662	10	1	0	0	0	0	0	0	0	Unaltered
P-0002351	Female	73	PD-1/PDL-1	Non-Small Cell Lung Cancer	7.76409	11	1	0	0	0	0	0	0	0	Unaltered
P-0002353	Female	47	CTLA4	Melanoma	18.8556	21	1	0	0	1	0	0	0	0	Altered
P-0002380	Female	51	Combo	Melanoma	9.9824	32	0	0	0	0	0	0	0	0	Unaltered
P-0002386	Female	33	PD-1/PDL-1	Glioma	5.54578	12	1	0	0	0	0	0	0	0	Unaltered
P-0002392	Male	53	CTLA4	Melanoma	34.3838	39	0	0	0	0	0	0	0	0	Unaltered
P-0002404	Male	72	PD-1/PDL-1	Bladder Cancer	3.32747	1	1	0	0	0	0	0	0	0	Unaltered
P-0002418	Female	30	CTLA4	Melanoma	3.32747	31	0	0	0	0	0	0	0	0	Unaltered
P-0002422	Female	76	PD-1/PDL-1	Melanoma	2.21831	6	1	0	0	0	0	1	0	0	Altered
P-0002429	Male	65	CTLA4	Melanoma	4.43662	7	1	0	0	0	0	0	0	0	Unaltered
P-0002444	Male	67	PD-1/PDL-1	Non-Small Cell Lung Cancer	17.7465	13	1	0	0	0	1	1	0	0	Altered
P-0002452	Female	57	PD-1/PDL-1	Glioma	1.10916	6	1	0	0	0	0	0	0	0	Unaltered
P-0002456	Female	74	CTLA4	Melanoma	7.76409	1	1	0	0	0	0	0	0	0	Unaltered
P-0002465	Male	43	Combo	Esophagogastric Cancer	12.2007	4	1	0	0	0	0	0	0	0	Unaltered
P-0002469	Male	55	PD-1/PDL-1	Head and Neck Cancer	3.32747	8	1	0	0	0	0	0	0	0	Unaltered
P-0002472	Male	56	PD-1/PDL-1	Bladder Cancer	2.21831	18	1	0	0	0	0	0	0	0	Unaltered
P-0002483	Female	67	PD-1/PDL-1	Renal Cell Carcinoma	5.54578	14	1	0	0	0	1	0	0	0	Altered
P-0002485	Male	45	PD-1/PDL-1	Non-Small Cell Lung Cancer	3.32747	24	1	0	0	0	0	0	0	0	Unaltered
P-0002490	Male	72	Combo	Melanoma	124.225	41	1	1	0	1	1	0	0	0	Altered
P-0002504	Male	67	CTLA4	Melanoma	36.6021	28	1	0	0	1	0	0	0	0	Altered
P-0002507	Female	43	PD-1/PDL-1	Melanoma	5.54578	10	1	0	0	0	0	0	0	0	Unaltered
P-0002517	Male	74	CTLA4	Melanoma	2.21831	19	1	0	0	0	0	0	0	0	Unaltered
P-0002546	Male	68	Combo	Non-Small Cell Lung Cancer	3.32747	25	1	0	0	0	0	0	0	0	Unaltered
P-0002551	Female	67	PD-1/PDL-1	Non-Small Cell Lung Cancer	17.7465	6	0	0	0	0	0	0	0	0	Unaltered
P-0002559	Female	39	PD-1/PDL-1	Non-Small Cell Lung Cancer	1.10916	43	0	0	0	0	0	0	0	0	Unaltered
P-0002568	Male	84	PD-1/PDL-1	Bladder Cancer	2.21831	39	0	0	0	0	0	0	0	0	Unaltered
P-0002575	Male	69	Combo	Bladder Cancer	6.65493	8	1	0	0	0	0	0	0	0	Unaltered
P-0002576	Male	78	PD-1/PDL-1	Bladder Cancer	2.93616	22	1	0	0	0	0	0	0	0	Unaltered
P-0002603	Male	76	PD-1/PDL-1	Head and Neck Cancer	1.10916	6	0	0	0	0	0	0	0	0	Unaltered
P-0002614	Male	58	PD-1/PDL-1	Bladder Cancer	7.76409	2	1	0	0	0	0	0	0	0	Unaltered
P-0002615	Female	57	Combo	Renal Cell Carcinoma	4.43662	46	0	0	0	0	0	0	0	0	Unaltered
P-0002620	Male	19	PD-1/PDL-1	Glioma	6.65493	11	1	0	0	0	0	0	0	0	Unaltered
P-0002626	Female	59	CTLA4	Breast Cancer	0	60	0	0	0	0	0	0	0	0	Unaltered
P-0002633	Male	49	Combo	Glioma	22.1831	21	1	0	0	0	0	0	0	0	Unaltered
P-0002637	Male	54	Combo	Non-Small Cell Lung Cancer	18.8556	37	0	1	0	0	0	0	0	0	Altered
P-0002639	Female	67	PD-1/PDL-1	Non-Small Cell Lung Cancer	12.2007	11	0	1	0	0	0	1	0	0	Altered
P-0002646	Male	43	PD-1/PDL-1	Non-Small Cell Lung Cancer	6.65493	4	1	0	0	0	0	0	0	0	Unaltered
P-0002647	Male	42	PD-1/PDL-1	Glioma	3.32747	4	1	0	0	0	0	0	0	0	Unaltered
P-0002653	Female	19	PD-1/PDL-1	Colorectal Cancer	2.21831	3	1	0	0	0	0	0	0	0	Unaltered
P-0002668	Male	74	PD-1/PDL-1	Bladder Cancer	9.9824	41	0	1	0	0	0	0	0	0	Altered
P-0002706	Female	71	CTLA4	Melanoma	17.7465	32	1	0	0	0	0	0	0	0	Unaltered
P-0002715	Male	67	PD-1/PDL-1	Bladder Cancer	15.5282	40	0	1	0	0	0	0	0	0	Altered
P-0002730	Male	50	PD-1/PDL-1	Colorectal Cancer	4.43662	6	1	0	0	0	0	0	0	0	Unaltered
P-0002731	Female	64	PD-1/PDL-1	Non-Small Cell Lung Cancer	9.7872	25	0	1	0	0	0	0	0	0	Altered
P-0002738	Female	32	PD-1/PDL-1	Non-Small Cell Lung Cancer	7.76409	1	1	0	0	0	0	0	0	0	Unaltered
P-0002745	Female	55	PD-1/PDL-1	Head and Neck Cancer	2.21831	2	1	0	0	0	0	0	0	0	Unaltered
P-0002748	Male	60	PD-1/PDL-1	Bladder Cancer	16.6382	4	1	0	0	0	0	0	0	0	Unaltered
P-0002751	Female	69	PD-1/PDL-1	Non-Small Cell Lung Cancer	2.21831	11	1	0	0	0	0	0	0	0	Unaltered
P-0002758	Male	63	PD-1/PDL-1	Non-Small Cell Lung Cancer	35.493	2	1	0	0	0	0	1	0	0	Altered
P-0002765	Male	53	CTLA4	Melanoma	5.54578	7	1	0	0	0	0	0	0	0	Unaltered
P-0002766	Female	66	PD-1/PDL-1	Non-Small Cell Lung Cancer	6.65493	6	1	0	0	0	0	1	0	0	Altered
P-0002787	Male	63	PD-1/PDL-1	Head and Neck Cancer	5.54578	6	0	0	0	0	0	0	0	0	Unaltered
P-0002789	Female	43	CTLA4	Breast Cancer	2.21831	9	1	0	0	0	0	0	0	0	Unaltered
P-0002792	Male	58	PD-1/PDL-1	Colorectal Cancer	5.54578	8	0	0	0	0	0	0	0	0	Unaltered
P-0002794	Female	61	PD-1/PDL-1	Non-Small Cell Lung Cancer	0	25	0	0	0	0	0	0	0	0	Unaltered
P-0002806	Male	82	PD-1/PDL-1	Non-Small Cell Lung Cancer	4.43662	46	0	0	0	0	0	0	0	0	Unaltered
P-0002818	Female	70	PD-1/PDL-1	Head and Neck Cancer	19.9648	15	0	0	0	0	0	0	0	0	Unaltered
P-0002820	Female	50	PD-1/PDL-1	Renal Cell Carcinoma	4.43662	38	0	0	0	0	0	0	0	1	Altered
P-0002826	Female	61	PD-1/PDL-1	Non-Small Cell Lung Cancer	14.419	4	1	0	0	0	0	0	0	0	Unaltered
P-0002836	Female	55	PD-1/PDL-1	Glioma	4.43662	1	1	0	0	0	0	0	0	0	Unaltered
P-0002855	Female	45	Combo	Colorectal Cancer	5.54578	2	1	0	0	0	0	0	0	0	Unaltered
P-0002864	Male	65	Combo	Renal Cell Carcinoma	3.32747	13	1	0	0	0	0	0	0	0	Unaltered
P-0002874	Female	55	PD-1/PDL-1	Non-Small Cell Lung Cancer	14.419	3	1	0	0	0	0	0	0	0	Unaltered
P-0002905	Male	73	PD-1/PDL-1	Non-Small Cell Lung Cancer	5.54578	6	1	0	0	0	0	0	0	0	Unaltered
P-0002914	Male	65	Combo	Melanoma	24.4014	24	1	0	0	0	0	0	0	0	Unaltered
P-0002917	Female	51	PD-1/PDL-1	Non-Small Cell Lung Cancer	6.65493	30	0	0	0	0	0	0	0	0	Unaltered
P-0002921	Female	73	PD-1/PDL-1	Non-Small Cell Lung Cancer	14.419	12	1	0	0	0	0	0	0	0	Unaltered
P-0002939	Male	35	PD-1/PDL-1	Head and Neck Cancer	1.10916	10	1	0	0	0	0	0	0	0	Unaltered
P-0002940	Male	52	PD-1/PDL-1	Renal Cell Carcinoma	2.21831	17	0	0	0	0	0	0	0	0	Unaltered
P-0002941	Male	50	PD-1/PDL-1	Renal Cell Carcinoma	2.21831	11	1	0	0	0	0	0	0	0	Unaltered
P-0002965	Male	56	PD-1/PDL-1	Non-Small Cell Lung Cancer	7.76409	11	1	0	0	0	0	0	0	0	Unaltered
P-0002969	Male	56	PD-1/PDL-1	Non-Small Cell Lung Cancer	22.1831	2	1	0	0	0	0	1	0	0	Altered
P-0002976	Male	77	PD-1/PDL-1	Renal Cell Carcinoma	2.21831	21	1	0	0	0	0	0	0	0	Unaltered
P-0002981	Female	51	PD-1/PDL-1	Glioma	0	12	1	0	0	0	0	0	0	0	Unaltered
P-0002993	Male	78	CTLA4	Melanoma	4.43662	59	1	0	0	0	0	0	0	0	Unaltered
P-0003000	Male	69	PD-1/PDL-1	Bladder Cancer	5.54578	3	1	1	0	0	0	0	0	0	Altered
P-0003003	Male	61	PD-1/PDL-1	Renal Cell Carcinoma	4.43662	22	0	0	0	0	0	0	0	0	Unaltered
P-0003009	Female	52	Combo	Head and Neck Cancer	8.87324	28	1	1	0	0	0	0	0	0	Altered
P-0003024	Male	74	Combo	Bladder Cancer	33.2747	2	1	1	0	0	0	0	0	0	Altered
P-0003034	Male	80	PD-1/PDL-1	Non-Small Cell Lung Cancer	13.7021	5	1	0	0	0	0	0	0	0	Unaltered
P-0003051	Male	46	Combo	Bladder Cancer	9.7872	7	1	0	0	0	0	0	0	0	Unaltered
P-0003059	Female	40	PD-1/PDL-1	Head and Neck Cancer	1.95744	10	1	0	0	0	0	0	0	0	Unaltered
P-0003069	Female	75	CTLA4	Melanoma	34.2552	7	1	0	0	0	0	0	0	0	Unaltered
P-0003097	Female	82	PD-1/PDL-1	Bladder Cancer	5.87232	13	1	0	0	0	0	0	0	0	Unaltered
P-0003117	Female	54	PD-1/PDL-1	Renal Cell Carcinoma	4.8936	13	1	0	0	0	1	0	0	0	Altered
P-0003119	Male	53	PD-1/PDL-1	Non-Small Cell Lung Cancer	12.7234	28	0	0	0	0	0	0	0	0	Unaltered
P-0003131	Male	59	PD-1/PDL-1	Bladder Cancer	6.85104	28	0	1	0	0	0	0	0	0	Altered
P-0003132	Female	67	PD-1/PDL-1	Non-Small Cell Lung Cancer	33.2765	7	1	0	0	0	0	0	0	0	Unaltered
P-0003157	Male	63	PD-1/PDL-1	Non-Small Cell Lung Cancer	5.87232	3	1	0	0	0	0	0	0	0	Unaltered
P-0003197	Male	55	CTLA4	Melanoma	1.95744	2	1	0	0	0	0	0	0	0	Unaltered
P-0003224	Female	60	CTLA4	Breast Cancer	14.6808	28	0	1	0	0	0	0	0	0	Altered
P-0003225	Female	82	Combo	Melanoma	7.82976	37	0	0	0	0	0	0	0	0	Unaltered
P-0003229	Male	61	PD-1/PDL-1	Non-Small Cell Lung Cancer	49.9147	21	1	1	1	1	0	0	0	0	Altered
P-0003241	Female	49	Combo	Breast Cancer	2.93616	2	1	0	0	0	0	0	0	0	Unaltered
P-0003255	Male	69	Combo	Melanoma	9.7872	2	1	0	0	0	0	0	0	0	Unaltered
P-0003265	Female	58	CTLA4	Breast Cancer	3.91488	19	1	0	0	0	0	0	0	0	Unaltered
P-0003272	Male	29	PD-1/PDL-1	Head and Neck Cancer	0.97872	8	1	0	0	0	0	0	0	0	Unaltered
P-0003273	Female	39	CTLA4	Breast Cancer	0.97872	6	1	0	0	0	0	0	0	0	Unaltered
P-0003275	Male	69	PD-1/PDL-1	Non-Small Cell Lung Cancer	2.93616	17	1	0	0	0	0	0	0	1	Altered
P-0003283	Male	63	PD-1/PDL-1	Renal Cell Carcinoma	2.93616	17	0	0	0	0	0	0	0	1	Altered
P-0003285	Female	37	PD-1/PDL-1	Colorectal Cancer	4.8936	3	0	0	0	0	0	0	0	0	Unaltered
P-0003319	Male	15	PD-1/PDL-1	Glioma	0.97872	4	1	0	0	0	0	0	0	0	Unaltered
P-0003322	Female	72	Combo	Non-Small Cell Lung Cancer	2.93616	13	0	0	0	0	0	0	0	0	Unaltered
P-0003347	Male	59	PD-1/PDL-1	Non-Small Cell Lung Cancer	15.6595	15	1	1	0	0	0	0	0	0	Altered
P-0003350	Male	59	PD-1/PDL-1	Glioma	2.93616	16	1	0	0	0	0	0	0	0	Unaltered
P-0003359	Male	82	PD-1/PDL-1	Melanoma	2.93616	1	1	0	0	0	0	0	0	0	Unaltered
P-0003360	Male	62	Combo	Glioma	2.93616	29	0	0	0	0	0	0	0	0	Unaltered
P-0003365	Male	47	PD-1/PDL-1	Colorectal Cancer	1.95744	7	1	0	0	0	0	0	0	0	Unaltered
P-0003368	Female	59	Combo	Non-Small Cell Lung Cancer	8.80848	38	0	0	0	0	0	0	0	0	Unaltered
P-0003372	Female	56	Combo	Melanoma	3.91488	33	0	0	0	0	0	0	0	0	Unaltered
P-0003374	Male	55	PD-1/PDL-1	Head and Neck Cancer	1.95744	1	1	0	0	0	0	0	0	0	Unaltered
P-0003377	Male	64	PD-1/PDL-1	Bladder Cancer	12.7234	23	0	0	0	0	0	0	0	0	Unaltered
P-0003401	Female	48	CTLA4	Melanoma	0.97872	25	1	0	0	0	0	0	0	0	Unaltered
P-0003406	Male	35	PD-1/PDL-1	Renal Cell Carcinoma	2.93616	13	1	0	0	0	0	0	0	0	Unaltered
P-0003432	Male	70	PD-1/PDL-1	Esophagogastric Cancer	5.87232	4	1	0	0	0	0	0	0	0	Unaltered
P-0003456	Female	45	PD-1/PDL-1	Glioma	2.93616	9	1	0	0	0	0	0	0	0	Unaltered
P-0003495	Female	90	PD-1/PDL-1	Non-Small Cell Lung Cancer	3.91488	21	1	0	0	0	0	0	0	0	Unaltered
P-0003507	Male	57	PD-1/PDL-1	Bladder Cancer	3.91488	1	1	0	0	0	0	0	0	0	Unaltered
P-0003521	Male	43	PD-1/PDL-1	Esophagogastric Cancer	6.85104	1	1	0	0	0	0	0	0	0	Unaltered
P-0003524	Male	62	PD-1/PDL-1	Bladder Cancer	42.0849	39	0	1	1	0	0	1	0	0	Altered
P-0003543	Male	75	PD-1/PDL-1	Esophagogastric Cancer	2.93616	2	1	0	0	0	0	0	0	0	Unaltered
P-0003553	Female	70	PD-1/PDL-1	Non-Small Cell Lung Cancer	29.3616	21	0	0	0	1	0	0	0	0	Altered
P-0003555	Male	32	PD-1/PDL-1	Bladder Cancer	68.5104	33	0	1	1	0	0	1	0	0	Altered
P-0003559	Female	48	Combo	Esophagogastric Cancer	0	5	0	0	0	0	0	0	0	0	Unaltered
P-0003560	Male	67	CTLA4	Melanoma	45.0211	41	0	0	0	0	0	0	0	0	Unaltered
P-0003562	Male	62	PD-1/PDL-1	Non-Small Cell Lung Cancer	36.2126	45	0	0	0	1	0	0	0	0	Altered
P-0003567	Male	50	PD-1/PDL-1	Glioma	2.93616	12	1	0	0	0	1	0	0	0	Altered
P-0003568	Male	55	PD-1/PDL-1	Renal Cell Carcinoma	3.91488	45	0	0	0	0	1	0	0	0	Altered
P-0003583	Male	59	Combo	Renal Cell Carcinoma	0	34	0	0	0	0	0	0	0	0	Unaltered
P-0003584	Female	61	PD-1/PDL-1	Non-Small Cell Lung Cancer	10.7659	36	1	0	0	1	0	0	0	0	Altered
P-0003596	Male	67	PD-1/PDL-1	Bladder Cancer	11.7446	4	1	0	0	0	0	0	0	0	Unaltered
P-0003598	Female	48	PD-1/PDL-1	Glioma	0.97872	6	1	0	0	0	0	0	0	0	Unaltered
P-0003620	Female	54	CTLA4	Melanoma	19.5744	33	0	1	0	0	0	0	0	0	Altered
P-0003621	Female	49	Combo	Melanoma	2.93616	35	0	0	0	0	0	0	0	0	Unaltered
P-0003628	Male	63	PD-1/PDL-1	Non-Small Cell Lung Cancer	12.7234	5	1	0	0	0	0	0	0	0	Unaltered
P-0003635	Female	57	Combo	Non-Small Cell Lung Cancer	6.85104	2	1	0	0	0	0	0	0	0	Unaltered
P-0003645	Male	77	PD-1/PDL-1	Renal Cell Carcinoma	4.8936	3	1	0	0	0	1	0	0	0	Altered
P-0003650	Male	69	PD-1/PDL-1	Esophagogastric Cancer	61.6593	9	0	1	1	0	1	0	1	0	Altered
P-0003670	Female	75	PD-1/PDL-1	Non-Small Cell Lung Cancer	0.97872	20	0	0	0	0	0	0	0	0	Unaltered
P-0003698	Male	63	Combo	Bladder Cancer	7.82976	34	0	0	0	0	0	1	0	0	Altered
P-0003700	Male	73	Combo	Melanoma	2.93616	36	0	0	0	0	0	0	0	0	Unaltered
P-0003703	Female	64	CTLA4	Melanoma	0.97872	30	1	0	0	0	0	0	0	0	Unaltered
P-0003711	Male	51	PD-1/PDL-1	Head and Neck Cancer	6.85104	5	1	0	0	0	0	0	0	0	Unaltered
P-0003719	Female	43	PD-1/PDL-1	Bladder Cancer	47.9573	15	1	0	0	1	1	0	0	0	Altered
P-0003721	Female	57	Combo	Renal Cell Carcinoma	2.93616	35	0	0	0	1	0	0	0	0	Altered
P-0003726	Female	68	PD-1/PDL-1	Head and Neck Cancer	0	15	0	0	0	0	0	0	0	0	Unaltered
P-0003728	Male	56	Combo	Melanoma	47.9573	34	0	1	1	1	0	0	0	0	Altered
P-0003738	Female	58	PD-1/PDL-1	Non-Small Cell Lung Cancer	4.8936	27	0	0	0	0	0	0	0	0	Unaltered
P-0003742	Female	36	CTLA4	Melanoma	4.8936	18	1	0	0	0	0	0	0	0	Unaltered
P-0003743	Male	71	Combo	Melanoma	8.80848	51	0	0	0	0	0	0	0	0	Unaltered
P-0003749	Male	61	Combo	Melanoma	4.8936	24	0	0	0	0	0	0	0	0	Unaltered
P-0003757	Male	65	Combo	Melanoma	8.80848	35	0	0	0	0	1	0	0	0	Altered
P-0003766	Male	60	PD-1/PDL-1	Renal Cell Carcinoma	4.8936	11	1	0	0	0	0	0	0	0	Unaltered
P-0003782	Male	57	PD-1/PDL-1	Non-Small Cell Lung Cancer	2.93616	8	1	0	0	0	0	0	0	0	Unaltered
P-0003783	Male	54	PD-1/PDL-1	Glioma	1.95744	13	1	0	0	0	0	0	0	0	Unaltered
P-0003814	Female	50	PD-1/PDL-1	Bladder Cancer	2.93616	5	0	1	0	0	0	0	0	0	Altered
P-0003865	Female	55	PD-1/PDL-1	Glioma	6.85104	6	1	0	0	0	0	0	0	0	Unaltered
P-0003868	Male	51	Combo	Melanoma	13.7021	49	1	0	0	0	0	0	0	0	Unaltered
P-0003869	Female	67	PD-1/PDL-1	Non-Small Cell Lung Cancer	54.8083	40	0	0	0	0	0	0	0	0	Unaltered
P-0003871	Male	84	PD-1/PDL-1	Melanoma	88.0848	4	0	0	0	1	0	0	0	0	Altered
P-0003872	Female	56	CTLA4	Melanoma	19.5744	65	0	0	0	0	0	1	0	0	Altered
P-0003881	Male	67	Combo	Melanoma	4.8936	26	0	0	0	0	0	0	0	0	Unaltered
P-0003892	Female	73	Combo	Esophagogastric Cancer	2.93616	2	0	0	0	0	0	0	0	0	Unaltered
P-0003899	Male	68	PD-1/PDL-1	Melanoma	1.95744	3	0	0	0	0	0	0	0	0	Unaltered
P-0003911	Female	70	PD-1/PDL-1	Bladder Cancer	4.8936	3	1	1	0	0	0	0	0	0	Altered
P-0003913	Female	44	PD-1/PDL-1	Non-Small Cell Lung Cancer	3.32747	1	1	0	0	0	0	0	0	0	Unaltered
P-0003914	Male	62	PD-1/PDL-1	Esophagogastric Cancer	9.9824	1	1	0	0	0	0	0	0	0	Unaltered
P-0003921	Male	47	Combo	Melanoma	14.6808	7	0	0	0	0	1	0	0	0	Altered
P-0003944	Male	71	CTLA4	Esophagogastric Cancer	5.54578	21	1	0	0	0	0	0	0	0	Unaltered
P-0003955	Male	75	PD-1/PDL-1	Bladder Cancer	6.65493	15	1	0	0	0	0	0	0	0	Unaltered
P-0003964	Male	72	PD-1/PDL-1	Non-Small Cell Lung Cancer	9.9824	4	1	0	0	0	0	0	0	0	Unaltered
P-0003967	Female	49	PD-1/PDL-1	Non-Small Cell Lung Cancer	3.91488	13	0	0	0	0	0	0	0	0	Unaltered
P-0003970	Female	46	PD-1/PDL-1	Non-Small Cell Lung Cancer	1.95744	12	1	0	0	0	0	0	0	0	Unaltered
P-0004011	Male	61	PD-1/PDL-1	Colorectal Cancer	63.6168	9	0	1	0	0	0	1	0	0	Altered
P-0004016	Male	55	PD-1/PDL-1	Esophagogastric Cancer	5.87232	3	1	0	0	0	0	0	0	0	Unaltered
P-0004020	Female	58	Combo	Non-Small Cell Lung Cancer	4.8936	28	1	0	0	0	0	0	0	0	Unaltered
P-0004043	Male	77	PD-1/PDL-1	Esophagogastric Cancer	5.54578	4	1	0	0	0	0	0	0	0	Unaltered
P-0004048	Male	56	PD-1/PDL-1	Melanoma	0.97872	41	1	0	0	0	0	0	0	0	Unaltered
P-0004050	Male	54	PD-1/PDL-1	Bladder Cancer	12.2007	43	0	0	0	0	0	0	0	0	Unaltered
P-0004051	Male	68	PD-1/PDL-1	Colorectal Cancer	68.5104	28	0	0	0	0	0	0	1	0	Altered
P-0004054	Male	61	PD-1/PDL-1	Non-Small Cell Lung Cancer	13.7021	4	1	0	0	1	0	0	0	0	Altered
P-0004056	Male	65	PD-1/PDL-1	Bladder Cancer	13.7021	6	1	0	0	0	0	0	0	1	Altered
P-0004077	Female	36	Combo	Renal Cell Carcinoma	1.95744	7	1	0	0	0	0	1	0	0	Altered
P-0004099	Male	61	PD-1/PDL-1	Non-Small Cell Lung Cancer	12.7234	3	1	1	0	1	0	0	0	0	Altered
P-0004103	Female	44	Combo	Non-Small Cell Lung Cancer	0.97872	23	1	0	0	0	0	0	0	0	Unaltered
P-0004117	Male	57	PD-1/PDL-1	Non-Small Cell Lung Cancer	3.91488	2	1	0	0	0	0	0	0	0	Unaltered
P-0004120	Female	58	PD-1/PDL-1	Non-Small Cell Lung Cancer	0.97872	12	0	0	0	0	0	0	0	0	Unaltered
P-0004126	Female	17	PD-1/PDL-1	Head and Neck Cancer	0	14	0	0	0	0	0	0	0	0	Unaltered
P-0004132	Male	42	Combo	Melanoma	4.8936	22	1	0	0	0	0	0	0	0	Unaltered
P-0004137	Male	60	Combo	Bladder Cancer	25.4467	27	0	0	0	0	0	1	0	0	Altered
P-0004140	Male	62	PD-1/PDL-1	Colorectal Cancer	10.7659	7	1	0	0	0	0	0	0	0	Unaltered
P-0004142	Female	67	CTLA4	Melanoma	22.5106	35	0	0	0	1	0	0	0	0	Altered
P-0004150	Male	73	PD-1/PDL-1	Renal Cell Carcinoma	5.87232	25	0	0	0	0	0	0	0	0	Unaltered
P-0004170	Male	59	Combo	Renal Cell Carcinoma	1.95744	38	0	0	0	0	0	0	0	0	Unaltered
P-0004189	Male	71	PD-1/PDL-1	Non-Small Cell Lung Cancer	58.7232	16	0	0	0	1	1	0	0	0	Altered
P-0004203	Male	23	Combo	Melanoma	8.80848	32	0	0	0	0	0	0	0	0	Unaltered
P-0004214	Male	84	PD-1/PDL-1	Melanoma	33.2765	31	1	0	0	1	1	1	0	0	Altered
P-0004226	Male	52	PD-1/PDL-1	Bladder Cancer	5.87232	18	0	0	0	1	0	0	0	0	Altered
P-0004232	Male	75	PD-1/PDL-1	Non-Small Cell Lung Cancer	6.85104	18	1	0	0	0	0	0	0	0	Unaltered
P-0004240	Female	76	Combo	Bladder Cancer	5.87232	4	1	0	0	0	0	0	0	0	Unaltered
P-0004253	Male	59	CTLA4	Melanoma	8.80848	42	1	0	0	0	0	0	0	0	Unaltered
P-0004256	Male	33	PD-1/PDL-1	Glioma	3.91488	7	1	0	0	0	0	0	0	0	Unaltered
P-0004257	Female	81	PD-1/PDL-1	Bladder Cancer	8.80848	6	0	0	0	0	0	0	0	0	Unaltered
P-0004259	Male	47	PD-1/PDL-1	Glioma	5.87232	2	1	0	0	0	0	0	0	0	Unaltered
P-0004272	Male	77	PD-1/PDL-1	Melanoma	9.7872	3	1	0	0	0	0	0	0	0	Unaltered
P-0004279	Female	59	PD-1/PDL-1	Non-Small Cell Lung Cancer	2.93616	13	0	0	0	0	0	0	0	0	Unaltered
P-0004294	Male	54	PD-1/PDL-1	Renal Cell Carcinoma	3.91488	7	1	1	0	0	0	0	0	0	Altered
P-0004315	Female	86	PD-1/PDL-1	Non-Small Cell Lung Cancer	8.80848	1	1	0	0	0	1	0	0	0	Altered
P-0004329	Male	25	Combo	Cancer of Unknown Primary	1.95744	15	0	0	0	0	0	0	0	0	Unaltered
P-0004348	Female	50	Combo	Melanoma	22.5106	32	0	0	0	0	0	0	0	0	Unaltered
P-0004349	Female	72	PD-1/PDL-1	Melanoma	5.87232	35	0	0	0	0	0	0	0	0	Unaltered
P-0004362	Male	38	PD-1/PDL-1	Colorectal Cancer	68.5104	34	1	1	0	0	0	1	0	0	Altered
P-0004366	Female	59	Combo	Bladder Cancer	4.8936	9	0	0	0	0	0	0	0	0	Unaltered
P-0004376	Male	80	PD-1/PDL-1	Renal Cell Carcinoma	5.87232	49	0	1	0	0	1	0	0	0	Altered
P-0004387	Male	85	PD-1/PDL-1	Bladder Cancer	1.95744	6	1	1	0	0	0	0	0	0	Altered
P-0004397	Male	51	PD-1/PDL-1	Renal Cell Carcinoma	3.91488	38	0	0	0	0	0	0	0	0	Unaltered
P-0004412	Male	55	PD-1/PDL-1	Renal Cell Carcinoma	3.91488	21	0	0	0	0	1	0	0	0	Altered
P-0004413	Female	73	PD-1/PDL-1	Renal Cell Carcinoma	1.95744	39	0	0	0	0	0	0	0	0	Unaltered
P-0004416	Male	45	PD-1/PDL-1	Head and Neck Cancer	1.95744	1	1	0	0	0	0	0	0	0	Unaltered
P-0004436	Male	75	PD-1/PDL-1	Non-Small Cell Lung Cancer	5.87232	24	1	1	0	0	0	0	0	0	Altered
P-0004437	Female	82	Combo	Melanoma	13.7021	35	0	0	0	0	1	0	0	0	Altered
P-0004442	Male	62	PD-1/PDL-1	Non-Small Cell Lung Cancer	34.2552	26	0	1	0	1	0	0	0	0	Altered
P-0004457	Female	83	PD-1/PDL-1	Melanoma	38.1701	11	1	0	1	1	0	0	0	0	Altered
P-0004458	Male	44	PD-1/PDL-1	Renal Cell Carcinoma	6.85104	24	0	0	0	0	1	0	0	0	Altered
P-0004463	Male	83	PD-1/PDL-1	Non-Small Cell Lung Cancer	6.85104	13	1	0	0	0	0	0	0	0	Unaltered
P-0004472	Female	63	PD-1/PDL-1	Non-Small Cell Lung Cancer	13.7021	10	1	0	0	0	0	0	0	0	Unaltered
P-0004492	Male	66	PD-1/PDL-1	Head and Neck Cancer	2.93616	20	1	0	0	0	0	0	0	0	Unaltered
P-0004494	Female	73	PD-1/PDL-1	Colorectal Cancer	9.7872	11	0	0	0	0	0	0	0	0	Unaltered
P-0004495	Male	40	PD-1/PDL-1	Non-Small Cell Lung Cancer	8.80848	8	1	0	0	0	0	0	0	0	Unaltered
P-0004507	Male	62	PD-1/PDL-1	Renal Cell Carcinoma	3.91488	42	0	0	0	0	1	0	0	0	Altered
P-0004517	Male	68	PD-1/PDL-1	Non-Small Cell Lung Cancer	14.6808	22	1	1	0	0	0	0	0	0	Altered
P-0004518	Female	67	CTLA4	Melanoma	24.468	38	0	0	0	0	0	0	0	0	Unaltered
P-0004527	Female	68	CTLA4	Melanoma	5.87232	47	1	0	0	0	0	0	0	0	Unaltered
P-0004552	Male	49	Combo	Esophagogastric Cancer	1.95744	9	1	0	0	0	0	0	0	0	Unaltered
P-0004561	Male	63	PD-1/PDL-1	Renal Cell Carcinoma	6.85104	8	1	0	0	0	1	0	0	0	Altered
P-0004588	Male	73	PD-1/PDL-1	Non-Small Cell Lung Cancer	3.91488	30	0	0	0	0	0	0	0	0	Unaltered
P-0004605	Male	42	PD-1/PDL-1	Esophagogastric Cancer	5.87232	7	0	0	0	0	0	0	0	0	Unaltered
P-0004612	Male	74	PD-1/PDL-1	Non-Small Cell Lung Cancer	3.91488	4	1	0	0	0	0	0	0	0	Unaltered
P-0004661	Male	33	Combo	Melanoma	6.85104	32	0	0	1	0	0	0	0	0	Altered
P-0004686	Female	61	PD-1/PDL-1	Melanoma	2.93616	5	1	0	0	0	0	0	0	0	Unaltered
P-0004693	Female	74	PD-1/PDL-1	Non-Small Cell Lung Cancer	9.7872	2	1	0	0	0	0	0	0	0	Unaltered
P-0004700	Male	59	PD-1/PDL-1	Melanoma	0	32	1	0	0	0	0	0	0	0	Unaltered
P-0004701	Female	53	PD-1/PDL-1	Non-Small Cell Lung Cancer	19.5744	30	0	1	0	0	0	0	0	0	Altered
P-0004706	Male	39	Combo	Melanoma	3.91488	13	1	0	0	0	0	0	0	0	Unaltered
P-0004742	Male	69	PD-1/PDL-1	Non-Small Cell Lung Cancer	8.80848	18	0	0	0	0	0	0	0	0	Unaltered
P-0004752	Male	86	PD-1/PDL-1	Non-Small Cell Lung Cancer	0.97872	29	0	0	0	1	0	0	0	0	Altered
P-0004759	Female	63	PD-1/PDL-1	Non-Small Cell Lung Cancer	1.95744	2	1	0	0	0	0	0	0	0	Unaltered
P-0004778	Male	45	PD-1/PDL-1	Glioma	0.97872	16	1	0	0	0	0	0	0	0	Unaltered
P-0004783	Male	43	Combo	Colorectal Cancer	46.9785	21	0	1	1	0	0	0	0	1	Altered
P-0004803	Male	59	PD-1/PDL-1	Colorectal Cancer	7.82976	6	0	0	0	0	0	0	0	0	Unaltered
P-0004812	Male	43	PD-1/PDL-1	Glioma	2.93616	21	0	0	0	0	0	0	0	0	Unaltered
P-0004813	Male	61	PD-1/PDL-1	Renal Cell Carcinoma	3.91488	39	0	0	0	0	0	0	0	0	Unaltered
P-0004815	Male	85	PD-1/PDL-1	Melanoma	3.91488	2	1	0	0	0	0	0	0	0	Unaltered
P-0004827	Male	59	PD-1/PDL-1	Non-Small Cell Lung Cancer	8.80848	19	1	0	0	0	0	0	0	0	Unaltered
P-0004832	Male	58	CTLA4	Melanoma	1.95744	29	1	0	0	0	0	0	0	0	Unaltered
P-0004857	Male	35	PD-1/PDL-1	Glioma	3.91488	33	0	0	0	0	0	0	0	0	Unaltered
P-0004871	Female	63	CTLA4	Melanoma	7.82976	44	0	0	0	0	0	0	0	0	Unaltered
P-0004890	Female	69	PD-1/PDL-1	Non-Small Cell Lung Cancer	10.7659	18	0	0	0	0	0	0	0	0	Unaltered
P-0004933	Male	56	Combo	Melanoma	14.6808	33	0	0	0	0	0	0	0	0	Unaltered
P-0004952	Male	54	Combo	Melanoma	36.2126	32	0	0	0	0	0	0	0	0	Unaltered
P-0004961	Female	68	PD-1/PDL-1	Non-Small Cell Lung Cancer	0.97872	9	1	0	0	0	0	0	0	0	Unaltered
P-0004971	Male	45	PD-1/PDL-1	Glioma	3.91488	17	1	0	0	0	0	0	0	0	Unaltered
P-0004983	Male	55	Combo	Bladder Cancer	1.95744	34	0	0	0	0	0	0	0	0	Unaltered
P-0004996	Male	57	Combo	Non-Small Cell Lung Cancer	2.93616	46	1	0	0	0	0	0	0	0	Unaltered
P-0005021	Male	68	PD-1/PDL-1	Bladder Cancer	207.489	25	0	1	0	1	1	1	1	0	Altered
P-0005039	Female	78	Combo	Melanoma	28.3829	1	1	0	0	1	0	1	0	0	Altered
P-0005048	Female	70	Combo	Non-Small Cell Lung Cancer	3.91488	51	0	0	0	0	0	0	0	0	Unaltered
P-0005053	Male	57	Combo	Melanoma	11.7446	36	0	0	0	0	0	0	0	0	Unaltered
P-0005054	Female	61	PD-1/PDL-1	Bladder Cancer	19.5744	3	0	0	0	0	0	0	0	0	Unaltered
P-0005062	Female	59	Combo	Melanoma	0.97872	31	0	0	0	0	0	0	0	0	Unaltered
P-0005082	Male	60	PD-1/PDL-1	Head and Neck Cancer	0	34	1	0	0	0	0	0	0	0	Unaltered
P-0005109	Male	61	Combo	Melanoma	16.6382	18	0	0	0	0	0	0	0	0	Unaltered
P-0005115	Male	54	PD-1/PDL-1	Non-Small Cell Lung Cancer	1.95744	15	0	0	0	0	0	0	0	0	Unaltered
P-0005118	Male	76	Combo	Melanoma	16.6382	28	0	0	0	0	0	0	0	0	Unaltered
P-0005121	Female	57	PD-1/PDL-1	Melanoma	2.93616	11	0	0	0	0	0	0	0	0	Unaltered
P-0005129	Female	90	PD-1/PDL-1	Melanoma	8.80848	11	1	0	0	0	1	0	0	0	Altered
P-0005131	Female	68	CTLA4	Breast Cancer	1.95744	5	1	0	0	0	0	0	0	0	Unaltered
P-0005132	Male	56	PD-1/PDL-1	Colorectal Cancer	6.85104	31	0	0	0	0	0	0	0	0	Unaltered
P-0005141	Male	56	PD-1/PDL-1	Glioma	0.97872	33	0	0	0	0	0	0	0	0	Unaltered
P-0005144	Male	64	CTLA4	Melanoma	5.87232	40	1	0	0	0	0	0	0	0	Unaltered
P-0005146	Female	78	PD-1/PDL-1	Melanoma	8.80848	32	0	0	0	0	0	0	0	0	Unaltered
P-0005150	Male	75	PD-1/PDL-1	Bladder Cancer	0.97872	1	0	0	0	0	0	0	0	0	Unaltered
P-0005151	Male	37	PD-1/PDL-1	Colorectal Cancer	65.5742	30	0	0	0	0	0	0	0	0	Unaltered
P-0005157	Male	25	Combo	Melanoma	3.91488	7	1	0	0	0	0	0	0	0	Unaltered
P-0005159	Male	83	PD-1/PDL-1	Melanoma	99.8294	27	1	1	0	0	1	1	0	0	Altered
P-0005176	Female	31	CTLA4	Breast Cancer	1.95744	5	1	0	0	0	0	0	0	0	Unaltered
P-0005177	Male	53	PD-1/PDL-1	Renal Cell Carcinoma	0.97872	19	1	0	0	0	0	0	0	0	Unaltered
P-0005180	Male	72	PD-1/PDL-1	Melanoma	1.95744	11	1	0	0	0	0	0	0	0	Unaltered
P-0005187	Female	44	Combo	Renal Cell Carcinoma	6.85104	33	0	1	0	0	0	0	0	0	Altered
P-0005201	Male	55	Combo	Melanoma	8.80848	32	0	0	0	0	0	0	0	0	Unaltered
P-0005222	Male	53	CTLA4	Melanoma	14.6808	69	0	0	0	0	0	0	0	0	Unaltered
P-0005226	Male	56	PD-1/PDL-1	Renal Cell Carcinoma	2.93616	29	1	0	0	0	0	0	0	0	Unaltered
P-0005228	Male	76	PD-1/PDL-1	Melanoma	91.9997	39	0	0	1	1	0	0	0	0	Altered
P-0005235	Male	61	Combo	Melanoma	0.97872	27	1	0	0	0	0	0	0	0	Unaltered
P-0005239	Female	52	PD-1/PDL-1	Cancer of Unknown Primary	3.91488	18	0	0	0	0	0	0	0	0	Unaltered
P-0005252	Female	79	PD-1/PDL-1	Non-Small Cell Lung Cancer	12.7234	2	1	0	0	0	0	0	0	0	Unaltered
P-0005254	Female	57	PD-1/PDL-1	Glioma	0.97872	5	1	0	0	0	0	0	0	0	Unaltered
P-0005260	Female	77	PD-1/PDL-1	Melanoma	11.7446	13	0	0	0	0	0	0	0	0	Unaltered
P-0005266	Male	68	PD-1/PDL-1	Bladder Cancer	5.87232	7	0	0	0	0	0	0	0	0	Unaltered
P-0005271	Male	64	PD-1/PDL-1	Renal Cell Carcinoma	7.82976	50	1	0	0	0	1	0	0	0	Altered
P-0005274	Female	69	PD-1/PDL-1	Breast Cancer	5.87232	2	1	0	0	0	0	0	0	0	Unaltered
P-0005289	Male	68	PD-1/PDL-1	Non-Small Cell Lung Cancer	9.7872	5	1	0	0	0	0	0	0	0	Unaltered
P-0005295	Male	73	PD-1/PDL-1	Non-Small Cell Lung Cancer	3.91488	29	0	0	0	0	0	0	0	0	Unaltered
P-0005304	Female	47	Combo	Melanoma	1.95744	1	1	0	0	0	0	0	0	0	Unaltered
P-0005309	Male	47	PD-1/PDL-1	Cancer of Unknown Primary	25.4467	1	1	0	1	0	0	1	0	0	Altered
P-0005320	Male	47	PD-1/PDL-1	Non-Small Cell Lung Cancer	7.82976	17	1	0	0	0	0	1	0	0	Altered
P-0005328	Male	78	PD-1/PDL-1	Renal Cell Carcinoma	5.87232	56	0	0	0	0	1	0	0	0	Altered
P-0005332	Female	66	PD-1/PDL-1	Renal Cell Carcinoma	2.93616	20	1	0	0	0	0	0	0	0	Unaltered
P-0005352	Female	65	Combo	Melanoma	7.82976	30	0	0	0	0	0	0	0	0	Unaltered
P-0005354	Male	60	PD-1/PDL-1	Renal Cell Carcinoma	5.87232	44	1	0	1	0	0	0	0	0	Altered
P-0005361	Female	54	PD-1/PDL-1	Glioma	2.93616	25	0	0	0	0	0	0	0	0	Unaltered
P-0005366	Male	74	PD-1/PDL-1	Melanoma	147.787	13	1	1	0	1	0	1	0	0	Altered
P-0005383	Male	41	PD-1/PDL-1	Melanoma	21.5318	49	0	0	0	1	1	0	0	0	Altered
P-0005421	Male	72	PD-1/PDL-1	Melanoma	14.6808	32	0	0	0	0	0	0	0	0	Unaltered
P-0005437	Female	66	PD-1/PDL-1	Renal Cell Carcinoma	0	37	0	0	0	0	0	0	0	0	Unaltered
P-0005456	Male	77	PD-1/PDL-1	Non-Small Cell Lung Cancer	5.87232	2	1	0	0	0	0	0	0	0	Unaltered
P-0005458	Female	63	PD-1/PDL-1	Renal Cell Carcinoma	2.93616	36	0	0	0	0	0	0	0	0	Unaltered
P-0005464	Female	67	PD-1/PDL-1	Non-Small Cell Lung Cancer	6.85104	11	1	0	0	0	0	0	0	0	Unaltered
P-0005488	Male	58	PD-1/PDL-1	Esophagogastric Cancer	10.7659	21	1	0	0	0	0	0	0	0	Unaltered
P-0005489	Male	50	PD-1/PDL-1	Bladder Cancer	11.7446	16	1	1	0	0	0	0	0	0	Altered
P-0005493	Male	27	Combo	Melanoma	6.85104	31	0	0	0	0	0	0	0	0	Unaltered
P-0005494	Male	72	Combo	Renal Cell Carcinoma	0	33	0	0	0	0	0	0	0	0	Unaltered
P-0005500	Male	62	CTLA4	Esophagogastric Cancer	24.468	1	1	1	1	0	1	1	0	0	Altered
P-0005510	Female	69	PD-1/PDL-1	Non-Small Cell Lung Cancer	5.87232	55	0	0	0	0	0	0	0	0	Unaltered
P-0005522	Female	73	PD-1/PDL-1	Colorectal Cancer	6.85104	17	0	0	0	0	0	0	0	0	Unaltered
P-0005539	Female	50	PD-1/PDL-1	Glioma	1.95744	8	1	0	0	0	0	0	0	0	Unaltered
P-0005553	Male	49	PD-1/PDL-1	Non-Small Cell Lung Cancer	4.8936	1	1	0	0	0	0	0	0	0	Unaltered
P-0005579	Female	56	PD-1/PDL-1	Non-Small Cell Lung Cancer	1.95744	1	1	0	0	0	0	0	0	0	Unaltered
P-0005583	Female	25	Combo	Melanoma	5.87232	1	1	0	0	0	0	0	0	0	Unaltered
P-0005593	Male	67	PD-1/PDL-1	Renal Cell Carcinoma	0.97872	59	0	0	0	0	0	0	0	0	Unaltered
P-0005604	Male	33	Combo	Melanoma	4.8936	30	0	0	0	1	0	0	0	0	Altered
P-0005627	Male	69	PD-1/PDL-1	Bladder Cancer	26.4254	28	0	0	0	0	0	0	0	0	Unaltered
P-0005629	Female	81	PD-1/PDL-1	Non-Small Cell Lung Cancer	5.87232	5	1	0	0	0	0	1	0	0	Altered
P-0005634	Male	34	CTLA4	Colorectal Cancer	8.80848	4	1	0	0	0	0	0	0	0	Unaltered
P-0005635	Female	46	PD-1/PDL-1	Glioma	5.87232	1	0	0	0	0	0	0	0	0	Unaltered
P-0005641	Male	76	PD-1/PDL-1	Renal Cell Carcinoma	0.97872	7	1	0	0	0	0	0	0	0	Unaltered
P-0005650	Male	77	Combo	Bladder Cancer	3.91488	8	1	0	0	0	0	0	0	0	Unaltered
P-0005655	Female	74	PD-1/PDL-1	Melanoma	3.91488	23	0	0	0	0	0	0	0	0	Unaltered
P-0005682	Male	66	PD-1/PDL-1	Renal Cell Carcinoma	3.91488	20	1	0	0	0	0	0	0	0	Unaltered
P-0005687	Male	53	PD-1/PDL-1	Melanoma	1.95744	11	1	0	0	0	0	0	0	0	Unaltered
P-0005711	Male	47	PD-1/PDL-1	Non-Small Cell Lung Cancer	2.93616	6	1	0	0	0	0	0	0	0	Unaltered
P-0005712	Female	43	CTLA4	Breast Cancer	3.91488	20	0	0	0	0	0	0	0	0	Unaltered
P-0005719	Male	71	PD-1/PDL-1	Renal Cell Carcinoma	3.91488	48	0	1	0	0	0	0	0	0	Altered
P-0005721	Male	79	PD-1/PDL-1	Non-Small Cell Lung Cancer	6.85104	14	1	0	0	1	0	0	0	0	Altered
P-0005725	Male	71	PD-1/PDL-1	Melanoma	25.4467	13	0	0	0	0	1	0	0	0	Altered
P-0005727	Male	51	Combo	Bladder Cancer	1.95744	11	1	0	0	1	0	0	0	0	Altered
P-0005731	Male	55	PD-1/PDL-1	Bladder Cancer	23.4893	1	1	1	0	0	1	0	0	0	Altered
P-0005733	Female	66	CTLA4	Melanoma	17.617	44	1	0	0	0	0	0	0	0	Unaltered
P-0005747	Male	69	PD-1/PDL-1	Renal Cell Carcinoma	2.93616	29	0	0	0	0	1	0	0	0	Altered
P-0005750	Male	72	PD-1/PDL-1	Renal Cell Carcinoma	7.82976	21	0	0	0	0	1	0	0	0	Altered
P-0005752	Male	66	PD-1/PDL-1	Non-Small Cell Lung Cancer	3.91488	14	1	0	0	0	0	0	0	0	Unaltered
P-0005762	Male	41	PD-1/PDL-1	Colorectal Cancer	1.95744	10	0	0	0	0	0	0	0	0	Unaltered
P-0005783	Female	52	PD-1/PDL-1	Cancer of Unknown Primary	65.5742	7	0	1	1	0	1	1	0	0	Altered
P-0005791	Male	58	PD-1/PDL-1	Head and Neck Cancer	3.91488	25	0	1	0	0	0	0	0	0	Altered
P-0005792	Male	59	PD-1/PDL-1	Non-Small Cell Lung Cancer	10.7659	10	1	0	1	0	0	0	0	0	Altered
P-0005794	Male	42	PD-1/PDL-1	Renal Cell Carcinoma	1.95744	14	0	0	0	0	1	0	0	0	Altered
P-0005795	Male	53	PD-1/PDL-1	Cancer of Unknown Primary	0	10	1	0	0	0	0	0	0	0	Unaltered
P-0005808	Male	41	PD-1/PDL-1	Renal Cell Carcinoma	4.8936	48	0	0	0	0	0	0	0	0	Unaltered
P-0005822	Female	58	PD-1/PDL-1	Renal Cell Carcinoma	2.93616	4	1	0	0	0	1	0	0	0	Altered
P-0005823	Male	66	PD-1/PDL-1	Colorectal Cancer	88.0848	29	0	1	1	1	0	1	0	0	Altered
P-0005842	Male	64	PD-1/PDL-1	Bladder Cancer	40.1275	15	0	1	1	0	0	1	0	0	Altered
P-0005848	Female	80	PD-1/PDL-1	Non-Small Cell Lung Cancer	16.6382	14	0	1	0	0	0	0	0	0	Altered
P-0005851	Male	80	PD-1/PDL-1	Non-Small Cell Lung Cancer	20.5531	18	0	1	0	0	0	0	0	0	Altered
P-0005855	Female	57	CTLA4	Breast Cancer	5.87232	3	1	0	0	1	0	0	0	0	Altered
P-0005869	Male	68	PD-1/PDL-1	Head and Neck Cancer	1.95744	7	1	0	0	0	0	0	0	0	Unaltered
P-0005882	Male	56	PD-1/PDL-1	Glioma	1.95744	5	1	0	0	0	0	0	0	0	Unaltered
P-0005897	Male	44	PD-1/PDL-1	Non-Small Cell Lung Cancer	5.87232	5	1	0	0	0	1	0	0	0	Altered
P-0005898	Female	71	PD-1/PDL-1	Non-Small Cell Lung Cancer	3.91488	21	0	0	0	0	0	0	0	0	Unaltered
P-0005912	Male	56	PD-1/PDL-1	Glioma	2.93616	29	1	0	0	0	0	0	0	0	Unaltered
P-0005913	Male	57	PD-1/PDL-1	Renal Cell Carcinoma	8.80848	26	0	0	0	0	1	0	0	0	Altered
P-0005928	Male	68	PD-1/PDL-1	Melanoma	17.617	29	0	0	0	0	0	0	0	0	Unaltered
P-0005929	Female	74	PD-1/PDL-1	Glioma	5.87232	15	1	0	0	0	0	0	0	0	Unaltered
P-0005947	Female	62	PD-1/PDL-1	Bladder Cancer	27.4042	2	0	1	0	0	0	0	0	0	Altered
P-0005954	Male	59	PD-1/PDL-1	Renal Cell Carcinoma	2.93616	38	0	0	0	0	0	0	0	0	Unaltered
P-0005958	Male	66	Combo	Renal Cell Carcinoma	3.91488	39	0	0	0	0	1	0	0	0	Altered
P-0005963	Male	15	PD-1/PDL-1	Glioma	1.95744	3	1	0	0	0	0	0	0	0	Unaltered
P-0005965	Female	62	PD-1/PDL-1	Renal Cell Carcinoma	3.91488	19	0	0	0	0	1	0	0	0	Altered
P-0005971	Female	25	Combo	Melanoma	2.93616	13	1	0	0	0	0	0	0	0	Unaltered
P-0005981	Male	61	PD-1/PDL-1	Non-Small Cell Lung Cancer	9.7872	47	0	0	0	0	0	0	0	0	Unaltered
P-0005998	Male	44	PD-1/PDL-1	Colorectal Cancer	3.91488	9	1	0	0	0	0	0	0	0	Unaltered
P-0006008	Male	63	PD-1/PDL-1	Head and Neck Cancer	8.80848	7	1	0	0	0	0	0	0	0	Unaltered
P-0006026	Male	66	PD-1/PDL-1	Esophagogastric Cancer	6.85104	12	0	0	0	0	0	0	0	0	Unaltered
P-0006034	Male	74	Combo	Melanoma	43.0637	30	0	0	0	0	1	1	0	0	Altered
P-0006045	Female	64	PD-1/PDL-1	Glioma	1.95744	20	1	0	0	0	0	0	0	0	Unaltered
P-0006046	Male	59	PD-1/PDL-1	Non-Small Cell Lung Cancer	19.5744	14	0	0	0	0	0	0	0	0	Unaltered
P-0006047	Female	63	PD-1/PDL-1	Non-Small Cell Lung Cancer	1.95744	24	0	0	0	0	0	0	0	0	Unaltered
P-0006055	Female	47	Combo	Renal Cell Carcinoma	5.87232	24	1	0	0	0	1	0	0	0	Altered
P-0006071	Female	52	PD-1/PDL-1	Non-Small Cell Lung Cancer	19.5744	19	0	0	0	0	0	1	0	0	Altered
P-0006077	Female	77	PD-1/PDL-1	Esophagogastric Cancer	4.8936	1	1	0	0	0	0	0	0	0	Unaltered
P-0006084	Male	62	PD-1/PDL-1	Non-Small Cell Lung Cancer	6.85104	21	1	0	0	0	0	1	0	0	Altered
P-0006095	Male	65	PD-1/PDL-1	Renal Cell Carcinoma	5.87232	6	1	0	0	0	0	0	0	0	Unaltered
P-0006097	Male	76	PD-1/PDL-1	Bladder Cancer	6.85104	10	0	0	0	0	0	0	0	0	Unaltered
P-0006109	Female	59	CTLA4	Melanoma	0.97872	5	0	0	0	0	0	0	0	0	Unaltered
P-0006114	Female	54	PD-1/PDL-1	Non-Small Cell Lung Cancer	2.93616	7	1	0	0	0	0	0	0	0	Unaltered
P-0006121	Female	81	CTLA4	Melanoma	2.93616	50	0	0	0	0	0	0	0	0	Unaltered
P-0006155	Male	83	PD-1/PDL-1	Melanoma	71.4465	4	0	0	0	0	0	0	0	0	Unaltered
P-0006177	Male	62	PD-1/PDL-1	Melanoma	42.0849	8	1	1	0	0	0	0	0	0	Altered
P-0006192	Female	35	Combo	Melanoma	6.85104	30	0	0	0	0	0	0	0	0	Unaltered
P-0006193	Female	82	Combo	Melanoma	8.80848	2	1	0	0	0	0	0	0	0	Unaltered
P-0006213	Male	50	PD-1/PDL-1	Colorectal Cancer	8.80848	5	1	0	0	0	0	0	0	0	Unaltered
P-0006220	Male	90	PD-1/PDL-1	Renal Cell Carcinoma	1.95744	1	1	0	0	0	0	0	0	0	Unaltered
P-0006221	Female	48	PD-1/PDL-1	Non-Small Cell Lung Cancer	0	13	1	0	0	0	0	0	0	0	Unaltered
P-0006222	Female	61	PD-1/PDL-1	Renal Cell Carcinoma	4.8936	24	1	1	0	0	1	0	0	0	Altered
P-0006227	Female	43	PD-1/PDL-1	Breast Cancer	6.85104	4	1	0	0	0	0	0	0	0	Unaltered
P-0006239	Male	72	PD-1/PDL-1	Renal Cell Carcinoma	2.93616	42	0	0	0	0	0	0	0	0	Unaltered
P-0006268	Male	71	PD-1/PDL-1	Non-Small Cell Lung Cancer	1.95744	12	1	0	0	0	0	0	0	0	Unaltered
P-0006270	Female	73	PD-1/PDL-1	Bladder Cancer	2.93616	9	1	0	0	0	0	0	0	0	Unaltered
P-0006281	Male	75	Combo	Bladder Cancer	24.468	28	0	1	1	0	0	0	0	0	Altered
P-0006282	Male	61	PD-1/PDL-1	Renal Cell Carcinoma	2.93616	3	1	1	0	0	1	0	0	0	Altered
P-0006294	Female	63	PD-1/PDL-1	Non-Small Cell Lung Cancer	3.91488	15	1	0	0	0	0	0	0	0	Unaltered
P-0006330	Male	45	PD-1/PDL-1	Cancer of Unknown Primary	1.95744	7	1	0	0	0	0	0	0	0	Unaltered
P-0006334	Female	53	PD-1/PDL-1	Renal Cell Carcinoma	2.93616	38	0	0	0	0	0	0	0	0	Unaltered
P-0006339	Female	64	PD-1/PDL-1	Melanoma	63.6168	1	0	0	0	1	0	1	0	0	Altered
P-0006343	Female	61	PD-1/PDL-1	Non-Small Cell Lung Cancer	5.87232	28	0	0	0	0	0	0	0	0	Unaltered
P-0006381	Male	63	PD-1/PDL-1	Renal Cell Carcinoma	1.95744	24	1	0	0	0	0	0	0	0	Unaltered
P-0006392	Male	72	PD-1/PDL-1	Renal Cell Carcinoma	3.91488	25	0	0	0	0	1	0	0	0	Altered
P-0006414	Female	70	PD-1/PDL-1	Esophagogastric Cancer	6.85104	19	0	0	0	0	0	0	0	0	Unaltered
P-0006415	Male	85	PD-1/PDL-1	Non-Small Cell Lung Cancer	4.8936	12	1	0	0	0	0	0	0	0	Unaltered
P-0006416	Male	64	PD-1/PDL-1	Glioma	1.95744	22	1	0	0	0	0	0	0	0	Unaltered
P-0006428	Female	21	PD-1/PDL-1	Glioma	6.85104	2	1	0	0	0	0	0	0	0	Unaltered
P-0006439	Male	60	PD-1/PDL-1	Head and Neck Cancer	4.8936	2	0	0	0	0	0	0	0	0	Unaltered
P-0006441	Male	57	PD-1/PDL-1	Glioma	3.91488	8	1	0	0	0	0	0	0	0	Unaltered
P-0006467	Male	73	Combo	Melanoma	2.93616	29	0	0	0	0	0	0	0	0	Unaltered
P-0006476	Male	43	CTLA4	Melanoma	11.7446	58	1	0	0	0	0	0	0	0	Unaltered
P-0006488	Female	73	Combo	Melanoma	7.82976	50	0	0	0	0	0	0	0	0	Unaltered
P-0006498	Male	60	PD-1/PDL-1	Renal Cell Carcinoma	0	33	1	0	0	0	0	0	0	0	Unaltered
P-0006500	Male	57	PD-1/PDL-1	Glioma	4.8936	5	1	0	0	0	0	0	0	0	Unaltered
P-0006503	Male	59	Combo	Renal Cell Carcinoma	4.8936	27	1	0	0	0	0	1	0	0	Altered
P-0006510	Female	69	PD-1/PDL-1	Renal Cell Carcinoma	17.617	43	0	0	0	0	0	0	0	0	Unaltered
P-0006516	Male	73	PD-1/PDL-1	Non-Small Cell Lung Cancer	1.95744	1	1	0	0	0	0	0	0	0	Unaltered
P-0006525	Female	66	PD-1/PDL-1	Head and Neck Cancer	3.91488	2	1	0	0	0	0	0	0	0	Unaltered
P-0006528	Female	66	PD-1/PDL-1	Cancer of Unknown Primary	6.85104	1	1	0	0	0	0	0	1	0	Altered
P-0006535	Female	57	PD-1/PDL-1	Bladder Cancer	4.8936	19	1	0	0	0	0	0	0	0	Unaltered
P-0006539	Male	44	Combo	Renal Cell Carcinoma	4.8936	21	1	0	0	1	1	0	0	0	Altered
P-0006541	Male	81	PD-1/PDL-1	Melanoma	33.2765	47	1	0	0	0	0	0	0	0	Unaltered
P-0006542	Male	72	Combo	Renal Cell Carcinoma	9.7872	32	0	0	0	0	1	0	0	0	Altered
P-0006545	Male	25	PD-1/PDL-1	Glioma	4.8936	4	1	0	0	0	0	0	0	0	Unaltered
P-0006546	Male	29	PD-1/PDL-1	Glioma	6.85104	32	0	0	0	1	0	0	0	0	Altered
P-0006550	Male	47	PD-1/PDL-1	Renal Cell Carcinoma	1.95744	39	0	0	0	0	0	0	0	0	Unaltered
P-0006557	Male	71	PD-1/PDL-1	Renal Cell Carcinoma	8.80848	30	0	0	1	0	1	0	0	0	Altered
P-0006570	Male	61	PD-1/PDL-1	Bladder Cancer	2.93616	11	1	0	0	0	0	0	0	0	Unaltered
P-0006572	Male	73	PD-1/PDL-1	Non-Small Cell Lung Cancer	0	20	0	0	0	0	0	0	0	0	Unaltered
P-0006582	Female	72	PD-1/PDL-1	Non-Small Cell Lung Cancer	4.8936	19	0	0	0	0	0	1	0	0	Altered
P-0006586	Male	64	PD-1/PDL-1	Renal Cell Carcinoma	3.91488	11	1	0	0	0	0	0	0	0	Unaltered
P-0006587	Male	51	PD-1/PDL-1	Colorectal Cancer	10.7659	9	0	0	0	0	0	0	0	0	Unaltered
P-0006628	Male	65	PD-1/PDL-1	Bladder Cancer	3.91488	19	0	0	0	0	0	0	0	0	Unaltered
P-0006639	Male	63	PD-1/PDL-1	Renal Cell Carcinoma	2.93616	44	0	0	0	0	1	0	0	0	Altered
P-0006641	Female	75	PD-1/PDL-1	Head and Neck Cancer	4.8936	9	1	0	0	0	0	0	0	0	Unaltered
P-0006642	Female	67	PD-1/PDL-1	Non-Small Cell Lung Cancer	20.5531	14	1	0	0	0	0	0	0	0	Unaltered
P-0006653	Female	62	PD-1/PDL-1	Renal Cell Carcinoma	4.8936	36	1	0	0	0	1	0	0	0	Altered
P-0006667	Male	58	PD-1/PDL-1	Glioma	2.93616	5	1	0	0	0	0	0	0	0	Unaltered
P-0006672	Male	45	PD-1/PDL-1	Glioma	4.8936	7	1	0	0	0	0	0	0	0	Unaltered
P-0006674	Female	66	PD-1/PDL-1	Non-Small Cell Lung Cancer	16.6382	7	1	0	0	0	0	1	0	0	Altered
P-0006708	Female	34	PD-1/PDL-1	Colorectal Cancer	9.7872	4	1	0	0	0	0	1	0	0	Altered
P-0006713	Female	52	PD-1/PDL-1	Non-Small Cell Lung Cancer	45.0211	23	0	1	0	1	0	0	0	0	Altered
P-0006719	Female	90	PD-1/PDL-1	Melanoma	38.1701	28	0	0	0	1	0	0	0	0	Altered
P-0006724	Female	48	PD-1/PDL-1	Non-Small Cell Lung Cancer	23.4893	18	0	1	0	0	0	1	0	0	Altered
P-0006728	Female	76	PD-1/PDL-1	Non-Small Cell Lung Cancer	13.7021	3	1	0	0	0	0	0	0	0	Unaltered
P-0006731	Female	52	Combo	Melanoma	14.6808	29	0	0	0	0	0	0	0	0	Unaltered
P-0006735	Male	71	PD-1/PDL-1	Colorectal Cancer	3.91488	20	0	0	0	0	0	0	0	0	Unaltered
P-0006738	Male	56	PD-1/PDL-1	Renal Cell Carcinoma	3.91488	18	0	0	0	0	0	0	0	0	Unaltered
P-0006743	Female	34	PD-1/PDL-1	Colorectal Cancer	5.87232	2	0	0	0	0	0	1	0	0	Altered
P-0006746	Female	16	PD-1/PDL-1	Renal Cell Carcinoma	0	7	1	0	0	0	0	0	0	0	Unaltered
P-0006762	Female	64	PD-1/PDL-1	Renal Cell Carcinoma	3.91488	68	1	0	0	0	0	0	0	0	Unaltered
P-0006765	Female	54	PD-1/PDL-1	Cancer of Unknown Primary	3.91488	2	1	0	0	0	0	0	0	0	Unaltered
P-0006768	Male	66	PD-1/PDL-1	Non-Small Cell Lung Cancer	7.82976	16	0	0	0	0	0	0	0	0	Unaltered
P-0006773	Female	67	PD-1/PDL-1	Melanoma	4.8936	9	1	0	0	0	0	0	0	0	Unaltered
P-0006800	Male	80	PD-1/PDL-1	Bladder Cancer	7.82976	7	1	1	0	0	0	0	0	0	Altered
P-0006826	Male	58	PD-1/PDL-1	Head and Neck Cancer	4.8936	28	1	0	0	0	0	0	0	0	Unaltered
P-0006842	Female	44	Combo	Breast Cancer	5.87232	9	1	0	0	0	0	0	0	0	Unaltered
P-0006845	Male	64	PD-1/PDL-1	Melanoma	5.87232	29	0	0	0	0	0	0	0	0	Unaltered
P-0006848	Female	53	PD-1/PDL-1	Glioma	5.87232	10	1	0	0	0	0	0	0	0	Unaltered
P-0006869	Male	70	PD-1/PDL-1	Esophagogastric Cancer	1.95744	4	1	1	0	0	0	0	0	0	Altered
P-0006895	Male	65	PD-1/PDL-1	Non-Small Cell Lung Cancer	36.2126	19	0	0	0	0	0	1	0	0	Altered
P-0006904	Male	52	PD-1/PDL-1	Renal Cell Carcinoma	1.95744	78	0	0	0	0	0	0	0	0	Unaltered
P-0006911	Male	40	PD-1/PDL-1	Esophagogastric Cancer	0	1	1	0	0	0	0	0	0	0	Unaltered
P-0006933	Female	56	PD-1/PDL-1	Colorectal Cancer	4.8936	14	1	0	0	0	0	0	0	0	Unaltered
P-0006934	Male	63	PD-1/PDL-1	Bladder Cancer	4.8936	20	0	0	0	0	0	0	0	0	Unaltered
P-0006935	Male	48	PD-1/PDL-1	Renal Cell Carcinoma	2.93616	30	1	0	0	0	1	0	0	0	Altered
P-0006946	Male	51	CTLA4	Melanoma	2.93616	13	1	0	0	0	0	0	0	0	Unaltered
P-0006952	Male	49	CTLA4	Melanoma	17.617	69	0	0	0	0	0	0	0	0	Unaltered
P-0006954	Female	67	PD-1/PDL-1	Non-Small Cell Lung Cancer	7.82976	3	1	0	0	0	0	0	0	0	Unaltered
P-0006959	Male	53	Combo	Renal Cell Carcinoma	1.95744	30	0	0	0	0	0	0	0	0	Unaltered
P-0006970	Male	48	PD-1/PDL-1	Glioma	4.8936	12	1	0	0	0	0	0	0	0	Unaltered
P-0006971	Male	62	CTLA4	Melanoma	1.95744	13	1	0	0	0	0	0	0	0	Unaltered
P-0006973	Male	52	PD-1/PDL-1	Melanoma	10.7659	61	0	0	0	0	0	0	0	0	Unaltered
P-0006993	Male	68	PD-1/PDL-1	Non-Small Cell Lung Cancer	7.82976	3	1	0	0	0	0	0	0	0	Unaltered
P-0007010	Male	17	PD-1/PDL-1	Glioma	0.97872	5	1	0	0	0	0	0	0	0	Unaltered
P-0007014	Female	44	CTLA4	Breast Cancer	2.93616	5	1	0	0	0	0	0	0	0	Unaltered
P-0007051	Male	71	PD-1/PDL-1	Non-Small Cell Lung Cancer	13.7021	2	1	0	0	0	0	0	0	0	Unaltered
P-0007061	Female	64	Combo	Melanoma	1.95744	28	0	0	0	0	0	0	0	0	Unaltered
P-0007068	Male	65	PD-1/PDL-1	Non-Small Cell Lung Cancer	8.80848	6	1	0	0	0	0	0	0	0	Unaltered
P-0007081	Male	49	PD-1/PDL-1	Colorectal Cancer	2.93616	3	1	0	0	0	0	0	0	0	Unaltered
P-0007083	Male	76	PD-1/PDL-1	Non-Small Cell Lung Cancer	12.9705	12	1	0	0	0	1	0	0	0	Altered
P-0007088	Female	45	PD-1/PDL-1	Non-Small Cell Lung Cancer	4.8936	32	1	0	0	0	0	0	0	0	Unaltered
P-0007090	Male	52	PD-1/PDL-1	Colorectal Cancer	4.8936	13	1	0	0	0	0	0	0	0	Unaltered
P-0007099	Female	78	PD-1/PDL-1	Non-Small Cell Lung Cancer	10.7659	1	1	1	0	0	0	0	0	0	Altered
P-0007101	Male	76	PD-1/PDL-1	Non-Small Cell Lung Cancer	11.7446	6	1	0	0	0	0	0	0	0	Unaltered
P-0007104	Male	70	PD-1/PDL-1	Glioma	3.91488	15	0	0	0	0	0	0	0	0	Unaltered
P-0007114	Male	77	PD-1/PDL-1	Non-Small Cell Lung Cancer	8.80848	1	1	0	0	0	0	1	0	0	Altered
P-0007118	Female	59	PD-1/PDL-1	Esophagogastric Cancer	6.85104	1	0	0	0	0	0	0	0	0	Unaltered
P-0007119	Male	61	PD-1/PDL-1	Non-Small Cell Lung Cancer	22.5106	21	0	1	0	0	0	1	0	0	Altered
P-0007121	Female	59	PD-1/PDL-1	Non-Small Cell Lung Cancer	7.82976	17	0	0	1	0	0	1	0	0	Altered
P-0007123	Female	67	PD-1/PDL-1	Non-Small Cell Lung Cancer	8.80848	24	0	0	0	0	0	0	0	0	Unaltered
P-0007124	Male	41	PD-1/PDL-1	Glioma	4.8936	2	1	0	0	0	0	0	0	0	Unaltered
P-0007127	Female	73	CTLA4	Breast Cancer	3.91488	15	1	0	0	0	0	0	0	0	Unaltered
P-0007142	Male	60	PD-1/PDL-1	Melanoma	4.8936	28	0	0	0	0	0	0	0	0	Unaltered
P-0007210	Female	68	PD-1/PDL-1	Renal Cell Carcinoma	2.93616	4	1	0	0	0	0	0	0	0	Unaltered
P-0007220	Male	67	PD-1/PDL-1	Head and Neck Cancer	9.7872	15	0	1	0	0	0	0	0	0	Altered
P-0007232	Male	57	PD-1/PDL-1	Melanoma	0	10	0	0	0	0	0	0	0	0	Unaltered
P-0007235	Female	72	Combo	Melanoma	8.80848	9	1	0	0	0	0	0	0	0	Unaltered
P-0007238	Male	30	PD-1/PDL-1	Melanoma	1.95744	28	0	0	0	0	0	0	0	0	Unaltered
P-0007274	Male	55	PD-1/PDL-1	Bladder Cancer	2.93616	6	0	0	0	0	0	0	0	0	Unaltered
P-0007278	Female	57	PD-1/PDL-1	Non-Small Cell Lung Cancer	7.82976	8	1	0	0	0	0	0	0	0	Unaltered
P-0007281	Male	82	PD-1/PDL-1	Melanoma	11.7446	6	1	0	0	0	0	0	0	0	Unaltered
P-0007293	Female	85	PD-1/PDL-1	Melanoma	5.87232	29	0	0	0	1	0	0	0	0	Altered
P-0007310	Female	46	Combo	Renal Cell Carcinoma	8.80848	31	0	0	0	0	0	0	0	0	Unaltered
P-0007314	Male	42	PD-1/PDL-1	Glioma	0	9	1	0	0	0	0	0	0	0	Unaltered
P-0007349	Female	32	CTLA4	Breast Cancer	4.8936	14	1	1	0	0	0	0	0	0	Altered
P-0007384	Male	50	Combo	Head and Neck Cancer	4.8936	12	1	0	0	0	0	0	0	0	Unaltered
P-0007388	Female	31	PD-1/PDL-1	Head and Neck Cancer	10.7659	15	1	0	0	0	1	0	0	0	Altered
P-0007399	Male	66	Combo	Renal Cell Carcinoma	2.93616	28	0	0	0	0	0	0	0	0	Unaltered
P-0007405	Male	57	PD-1/PDL-1	Colorectal Cancer	6.85104	30	0	0	0	0	0	0	0	0	Unaltered
P-0007407	Male	65	PD-1/PDL-1	Head and Neck Cancer	11.7446	11	1	0	0	0	0	0	0	0	Unaltered
P-0007410	Male	38	PD-1/PDL-1	Colorectal Cancer	1.95744	29	0	0	0	0	0	0	0	0	Unaltered
P-0007418	Female	57	PD-1/PDL-1	Non-Small Cell Lung Cancer	16.6382	22	0	0	0	0	0	0	0	0	Unaltered
P-0007420	Female	85	PD-1/PDL-1	Non-Small Cell Lung Cancer	3.91488	8	1	0	0	1	0	0	0	0	Altered
P-0007421	Male	64	PD-1/PDL-1	Bladder Cancer	1.95744	27	0	0	0	0	0	0	0	0	Unaltered
P-0007484	Female	51	PD-1/PDL-1	Bladder Cancer	5.87232	7	0	0	0	0	0	0	0	1	Altered
P-0007486	Female	55	PD-1/PDL-1	Colorectal Cancer	5.87232	2	1	0	0	0	0	0	0	0	Unaltered
P-0007493	Male	75	PD-1/PDL-1	Non-Small Cell Lung Cancer	18.5957	13	0	1	0	0	0	0	0	0	Altered
P-0007495	Male	81	PD-1/PDL-1	Colorectal Cancer	13.7021	5	0	0	0	0	0	0	0	0	Unaltered
P-0007504	Male	50	PD-1/PDL-1	Glioma	1.95744	16	1	0	0	0	0	0	0	0	Unaltered
P-0007514	Female	73	PD-1/PDL-1	Non-Small Cell Lung Cancer	3.91488	2	1	0	0	0	0	0	0	0	Unaltered
P-0007517	Male	73	Combo	Melanoma	6.85104	4	1	0	0	0	0	0	0	0	Unaltered
P-0007525	Female	65	PD-1/PDL-1	Non-Small Cell Lung Cancer	4.8936	2	1	0	0	0	1	0	0	0	Altered
P-0007531	Female	38	PD-1/PDL-1	Esophagogastric Cancer	8.80848	27	1	0	0	1	0	0	0	0	Altered
P-0007540	Female	58	PD-1/PDL-1	Renal Cell Carcinoma	5.87232	19	0	0	0	0	1	0	0	0	Altered
P-0007543	Male	67	PD-1/PDL-1	Head and Neck Cancer	3.91488	11	0	0	0	0	0	0	0	0	Unaltered
P-0007556	Male	55	Combo	Renal Cell Carcinoma	8.80848	29	0	0	0	0	1	0	0	0	Altered
P-0007567	Male	56	Combo	Colorectal Cancer	7.82976	7	0	0	0	0	0	0	0	0	Unaltered
P-0007575	Male	65	PD-1/PDL-1	Head and Neck Cancer	5.87232	4	1	0	0	0	0	1	0	0	Altered
P-0007580	Female	63	PD-1/PDL-1	Non-Small Cell Lung Cancer	2.93616	10	1	0	0	0	0	0	0	0	Unaltered
P-0007582	Male	83	PD-1/PDL-1	Non-Small Cell Lung Cancer	4.8936	3	1	0	0	1	0	0	0	0	Altered
P-0007583	Female	70	PD-1/PDL-1	Non-Small Cell Lung Cancer	13.7021	7	1	0	0	0	0	0	0	0	Unaltered
P-0007597	Male	73	PD-1/PDL-1	Non-Small Cell Lung Cancer	15.6595	5	1	0	0	0	0	1	0	0	Altered
P-0007619	Male	78	PD-1/PDL-1	Non-Small Cell Lung Cancer	9.7872	1	1	0	0	0	0	0	0	0	Unaltered
P-0007620	Male	54	PD-1/PDL-1	Head and Neck Cancer	5.87232	32	0	0	0	0	0	0	0	0	Unaltered
P-0007622	Male	53	Combo	Head and Neck Cancer	5.87232	2	1	0	0	0	0	0	0	0	Unaltered
P-0007633	Male	79	Combo	Non-Small Cell Lung Cancer	2.93616	48	0	0	0	0	0	0	0	0	Unaltered
P-0007656	Male	57	PD-1/PDL-1	Bladder Cancer	13.7021	18	0	0	0	0	0	0	0	0	Unaltered
P-0007674	Male	77	PD-1/PDL-1	Esophagogastric Cancer	0	7	1	0	0	0	0	0	0	0	Unaltered
P-0007693	Male	55	PD-1/PDL-1	Glioma	5.87232	17	1	0	0	0	0	0	0	0	Unaltered
P-0007736	Female	33	CTLA4	Melanoma	11.7446	71	0	0	0	0	0	0	0	0	Unaltered
P-0007748	Male	45	Combo	Esophagogastric Cancer	1.95744	2	1	0	0	0	0	0	0	0	Unaltered
P-0007771	Female	59	PD-1/PDL-1	Colorectal Cancer	4.8936	5	1	0	0	0	0	0	0	0	Unaltered
P-0007806	Female	53	Combo	Renal Cell Carcinoma	2.93616	18	1	0	0	0	0	0	0	0	Unaltered
P-0007810	Male	70	PD-1/PDL-1	Melanoma	42.0849	27	0	1	0	1	0	1	0	0	Altered
P-0007834	Female	63	PD-1/PDL-1	Renal Cell Carcinoma	6.85104	23	0	0	0	0	1	0	0	0	Altered
P-0007839	Male	54	PD-1/PDL-1	Head and Neck Cancer	1.95744	11	1	0	0	0	0	0	0	0	Unaltered
P-0007845	Male	59	PD-1/PDL-1	Esophagogastric Cancer	1.95744	4	0	0	0	0	0	0	0	0	Unaltered
P-0007861	Female	77	PD-1/PDL-1	Non-Small Cell Lung Cancer	2.93616	12	1	0	0	0	0	0	0	0	Unaltered
P-0007876	Female	72	PD-1/PDL-1	Melanoma	36.2126	12	0	0	1	1	0	0	0	0	Altered
P-0007879	Female	70	PD-1/PDL-1	Non-Small Cell Lung Cancer	9.7872	31	0	0	0	0	0	0	0	0	Unaltered
P-0007895	Male	37	Combo	Esophagogastric Cancer	3.91488	1	1	0	0	0	0	0	0	0	Unaltered
P-0007916	Male	69	PD-1/PDL-1	Non-Small Cell Lung Cancer	14.6808	22	0	0	0	0	0	1	0	0	Altered
P-0007917	Male	60	PD-1/PDL-1	Glioma	2.93616	12	1	0	0	1	0	0	0	0	Altered
P-0007918	Male	71	Combo	Melanoma	55.787	1	1	0	0	0	0	0	0	0	Unaltered
P-0007925	Male	55	Combo	Head and Neck Cancer	3.91488	5	1	0	0	0	0	0	0	0	Unaltered
P-0007927	Male	60	PD-1/PDL-1	Melanoma	0.97872	4	1	0	0	0	0	0	0	0	Unaltered
P-0007961	Male	63	PD-1/PDL-1	Renal Cell Carcinoma	7.82976	23	1	0	0	0	1	0	0	0	Altered
P-0007970	Male	55	Combo	Melanoma	11.7446	3	0	0	0	0	0	0	0	0	Unaltered
P-0007971	Male	71	PD-1/PDL-1	Head and Neck Cancer	5.87232	29	1	0	0	0	0	0	0	0	Unaltered
P-0007977	Female	70	PD-1/PDL-1	Non-Small Cell Lung Cancer	5.87232	3	1	0	0	0	0	0	0	0	Unaltered
P-0007978	Female	50	PD-1/PDL-1	Non-Small Cell Lung Cancer	10.7659	6	1	0	0	0	0	0	0	0	Unaltered
P-0007995	Female	54	PD-1/PDL-1	Esophagogastric Cancer	29.3616	35	0	1	0	0	1	1	0	0	Altered
P-0007997	Female	59	PD-1/PDL-1	Colorectal Cancer	51.8721	1	1	1	1	0	0	0	0	0	Altered
P-0008004	Female	70	PD-1/PDL-1	Esophagogastric Cancer	1.95744	4	1	0	0	0	0	0	0	0	Unaltered
P-0008005	Male	45	PD-1/PDL-1	Renal Cell Carcinoma	3.91488	27	0	0	0	0	0	0	0	0	Unaltered
P-0008009	Male	60	Combo	Melanoma	8.80848	24	0	0	0	0	0	0	0	0	Unaltered
P-0008033	Male	66	PD-1/PDL-1	Head and Neck Cancer	3.91488	8	1	0	0	0	0	0	0	0	Unaltered
P-0008036	Female	79	Combo	Head and Neck Cancer	3.91488	2	1	0	0	0	0	0	0	0	Unaltered
P-0008050	Male	55	PD-1/PDL-1	Melanoma	0.97872	15	0	0	0	0	0	0	0	0	Unaltered
P-0008053	Male	56	Combo	Renal Cell Carcinoma	2.93616	27	0	0	0	0	1	0	0	0	Altered
P-0008061	Male	68	PD-1/PDL-1	Renal Cell Carcinoma	8.80848	1	1	1	0	0	1	0	0	0	Altered
P-0008062	Female	74	PD-1/PDL-1	Bladder Cancer	6.85104	18	0	0	0	0	0	0	0	0	Unaltered
P-0008080	Male	77	CTLA4	Melanoma	46.9785	39	0	0	0	1	0	0	0	0	Altered
P-0008137	Male	54	Combo	Renal Cell Carcinoma	2.93616	33	0	1	0	0	0	0	0	0	Altered
P-0008161	Male	82	PD-1/PDL-1	Non-Small Cell Lung Cancer	4.8936	3	0	0	0	0	0	0	0	0	Unaltered
P-0008166	Male	64	PD-1/PDL-1	Glioma	2.93616	16	1	0	0	0	0	0	0	0	Unaltered
P-0008168	Male	78	PD-1/PDL-1	Bladder Cancer	6.85104	4	0	1	0	0	0	0	0	0	Altered
P-0008169	Female	53	PD-1/PDL-1	Head and Neck Cancer	6.85104	6	1	0	0	0	0	0	0	0	Unaltered
P-0008176	Female	72	PD-1/PDL-1	Non-Small Cell Lung Cancer	3.91488	23	0	0	0	0	0	0	0	0	Unaltered
P-0008187	Male	66	PD-1/PDL-1	Esophagogastric Cancer	5.87232	11	0	0	0	0	0	0	0	0	Unaltered
P-0008188	Female	72	PD-1/PDL-1	Esophagogastric Cancer	46.9785	5	1	1	1	0	0	0	0	0	Altered
P-0008228	Male	80	PD-1/PDL-1	Melanoma	43.0637	28	0	1	0	0	0	0	0	0	Altered
P-0008239	Female	74	PD-1/PDL-1	Non-Small Cell Lung Cancer	15.6595	15	1	0	0	0	0	0	0	0	Unaltered
P-0008248	Male	41	PD-1/PDL-1	Head and Neck Cancer	11.7446	2	1	0	0	0	0	0	0	0	Unaltered
P-0008249	Male	69	PD-1/PDL-1	Renal Cell Carcinoma	2.93616	24	0	0	0	0	0	0	0	0	Unaltered
P-0008257	Male	66	PD-1/PDL-1	Glioma	6.85104	10	1	0	0	0	0	0	0	0	Unaltered
P-0008258	Female	57	PD-1/PDL-1	Glioma	2.93616	2	1	0	0	0	0	0	0	0	Unaltered
P-0008290	Male	75	PD-1/PDL-1	Bladder Cancer	6.85104	23	0	0	0	0	0	0	0	0	Unaltered
P-0008295	Male	58	PD-1/PDL-1	Non-Small Cell Lung Cancer	5.87232	14	0	0	0	0	0	0	0	0	Unaltered
P-0008305	Male	40	PD-1/PDL-1	Esophagogastric Cancer	2.93616	1	1	0	0	0	0	0	0	0	Unaltered
P-0008322	Male	67	PD-1/PDL-1	Non-Small Cell Lung Cancer	2.93616	29	0	0	0	0	0	0	0	0	Unaltered
P-0008323	Male	74	PD-1/PDL-1	Head and Neck Cancer	0	4	1	0	0	0	0	0	0	0	Unaltered
P-0008328	Female	34	PD-1/PDL-1	Head and Neck Cancer	10.7659	25	1	0	0	0	0	0	0	0	Unaltered
P-0008332	Female	57	PD-1/PDL-1	Non-Small Cell Lung Cancer	3.91488	26	0	0	0	0	0	0	0	0	Unaltered
P-0008340	Female	50	PD-1/PDL-1	Renal Cell Carcinoma	3.91488	5	1	0	0	0	0	0	0	0	Unaltered
P-0008353	Male	77	PD-1/PDL-1	Head and Neck Cancer	24.468	8	1	0	0	1	0	1	0	0	Altered
P-0008375	Female	54	Combo	Melanoma	9.7872	1	1	0	0	0	0	0	0	0	Unaltered
P-0008380	Male	45	PD-1/PDL-1	Glioma	1.95744	10	1	0	0	0	0	0	0	0	Unaltered
P-0008399	Female	64	Combo	Renal Cell Carcinoma	4.8936	34	1	0	0	0	1	0	0	0	Altered
P-0008403	Male	50	Combo	Melanoma	20.5531	24	0	0	0	0	0	0	0	0	Unaltered
P-0008425	Male	69	PD-1/PDL-1	Bladder Cancer	5.87232	7	1	0	0	0	0	0	0	0	Unaltered
P-0008434	Female	51	PD-1/PDL-1	Melanoma	50.8934	23	0	0	1	1	0	0	0	0	Altered
P-0008439	Female	82	PD-1/PDL-1	Bladder Cancer	18.5957	6	1	1	0	0	0	0	0	0	Altered
P-0008442	Female	65	PD-1/PDL-1	Non-Small Cell Lung Cancer	4.8936	11	1	0	0	0	0	0	0	0	Unaltered
P-0008445	Male	50	Combo	Melanoma	5.87232	18	0	0	0	0	0	0	0	0	Unaltered
P-0008459	Male	53	Combo	Renal Cell Carcinoma	0.97872	29	0	0	0	0	0	0	0	0	Unaltered
P-0008490	Female	67	PD-1/PDL-1	Melanoma	5.87232	24	0	0	0	0	0	0	0	0	Unaltered
P-0008492	Male	28	Combo	Melanoma	2.93616	14	1	0	0	0	0	0	0	0	Unaltered
P-0008518	Male	73	PD-1/PDL-1	Head and Neck Cancer	0.97872	2	1	0	0	0	0	0	0	0	Unaltered
P-0008522	Female	63	PD-1/PDL-1	Renal Cell Carcinoma	7.82976	16	1	1	0	1	0	0	0	0	Altered
P-0008528	Male	66	Combo	Head and Neck Cancer	7.82976	5	1	0	0	0	0	0	0	0	Unaltered
P-0008532	Male	71	PD-1/PDL-1	Bladder Cancer	2.93616	9	1	0	0	0	0	0	0	0	Unaltered
P-0008537	Male	69	PD-1/PDL-1	Renal Cell Carcinoma	0	3	1	0	0	0	0	0	0	0	Unaltered
P-0008571	Female	50	PD-1/PDL-1	Breast Cancer	1.95744	15	0	0	0	0	0	1	0	0	Altered
P-0008575	Male	67	PD-1/PDL-1	Bladder Cancer	1.95744	11	1	0	0	0	0	0	0	0	Unaltered
P-0008595	Female	78	PD-1/PDL-1	Bladder Cancer	20.5531	24	0	0	0	0	0	1	0	0	Altered
P-0008651	Female	55	PD-1/PDL-1	Colorectal Cancer	6.85104	15	0	0	0	0	0	0	0	0	Unaltered
P-0008659	Male	65	PD-1/PDL-1	Melanoma	8.80848	8	1	0	0	0	0	0	0	0	Unaltered
P-0008662	Female	72	PD-1/PDL-1	Colorectal Cancer	1.95744	9	0	0	0	0	0	0	0	0	Unaltered
P-0008678	Female	73	PD-1/PDL-1	Non-Small Cell Lung Cancer	7.82976	25	0	0	0	0	0	0	0	0	Unaltered
P-0008718	Male	52	PD-1/PDL-1	Bladder Cancer	10.7659	8	0	0	0	0	0	0	0	0	Unaltered
P-0008728	Female	57	Combo	Melanoma	44.0424	25	0	0	0	1	0	0	0	0	Altered
P-0008733	Male	72	PD-1/PDL-1	Melanoma	7.82976	12	1	1	0	0	0	0	0	0	Altered
P-0008746	Female	68	PD-1/PDL-1	Colorectal Cancer	47.9573	11	0	1	1	1	1	1	0	0	Altered
P-0008765	Male	60	PD-1/PDL-1	Non-Small Cell Lung Cancer	7.82976	3	0	0	0	0	0	0	0	0	Unaltered
P-0008772	Male	65	PD-1/PDL-1	Renal Cell Carcinoma	2.93616	21	0	0	0	0	0	0	0	0	Unaltered
P-0008784	Female	70	PD-1/PDL-1	Melanoma	8.80848	8	1	0	0	0	0	0	0	0	Unaltered
P-0008785	Female	53	PD-1/PDL-1	Renal Cell Carcinoma	3.91488	11	1	0	0	0	0	0	0	0	Unaltered
P-0008786	Male	65	PD-1/PDL-1	Non-Small Cell Lung Cancer	4.8936	24	0	0	0	0	0	0	0	0	Unaltered
P-0008792	Male	70	PD-1/PDL-1	Head and Neck Cancer	10.7659	21	0	0	0	0	1	0	0	0	Altered
P-0008798	Male	41	PD-1/PDL-1	Head and Neck Cancer	0.97872	3	1	0	0	0	0	0	0	0	Unaltered
P-0008800	Male	59	PD-1/PDL-1	Head and Neck Cancer	2.93616	5	1	0	0	0	0	0	0	0	Unaltered
P-0008816	Female	52	PD-1/PDL-1	Bladder Cancer	0.97872	3	1	0	0	0	0	0	0	0	Unaltered
P-0008830	Male	58	PD-1/PDL-1	Renal Cell Carcinoma	1.95744	21	0	0	0	0	0	0	0	0	Unaltered
P-0008841	Female	68	PD-1/PDL-1	Colorectal Cancer	3.91488	16	0	0	0	0	0	0	0	0	Unaltered
P-0008848	Male	76	PD-1/PDL-1	Non-Small Cell Lung Cancer	5.87232	5	1	0	0	0	1	0	0	0	Altered
P-0008851	Male	63	PD-1/PDL-1	Non-Small Cell Lung Cancer	7.82976	3	1	0	0	0	0	0	0	0	Unaltered
P-0008857	Female	74	PD-1/PDL-1	Melanoma	49.9147	24	0	0	0	1	0	0	0	0	Altered
P-0008870	Female	76	PD-1/PDL-1	Melanoma	0.97872	19	0	0	0	0	0	0	0	0	Unaltered
P-0008874	Male	58	PD-1/PDL-1	Non-Small Cell Lung Cancer	10.7659	1	1	0	0	0	1	0	0	0	Altered
P-0008904	Female	31	Combo	Melanoma	1.95744	11	1	0	0	0	0	0	0	0	Unaltered
P-0008912	Female	28	Combo	Melanoma	15.6595	1	1	0	0	0	1	0	0	0	Altered
P-0008922	Male	67	PD-1/PDL-1	Non-Small Cell Lung Cancer	2.93616	1	1	0	0	0	0	0	0	0	Unaltered
P-0008935	Female	75	PD-1/PDL-1	Non-Small Cell Lung Cancer	10.7659	5	1	0	0	0	0	0	0	0	Unaltered
P-0008939	Female	77	PD-1/PDL-1	Glioma	2.93616	15	1	0	0	0	0	0	0	0	Unaltered
P-0008942	Male	68	Combo	Melanoma	33.2765	25	0	0	1	0	0	0	0	0	Altered
P-0008944	Female	47	PD-1/PDL-1	Non-Small Cell Lung Cancer	10.7659	11	1	0	0	0	0	0	0	0	Unaltered
P-0008946	Female	87	PD-1/PDL-1	Melanoma	15.6595	23	0	1	0	0	0	0	0	0	Altered
P-0008963	Male	46	CTLA4	Melanoma	8.80848	44	0	0	0	0	0	0	0	0	Unaltered
P-0008964	Male	57	PD-1/PDL-1	Renal Cell Carcinoma	0.97872	21	0	0	0	0	0	0	0	0	Unaltered
P-0008974	Male	86	PD-1/PDL-1	Melanoma	34.2552	4	1	0	1	0	0	1	0	0	Altered
P-0008997	Female	56	Combo	Melanoma	63.6168	23	0	1	1	0	0	0	0	0	Altered
P-0008999	Male	53	Combo	Melanoma	10.7659	6	1	0	0	0	1	0	0	0	Altered
P-0009005	Male	72	PD-1/PDL-1	Bladder Cancer	10.7659	4	1	1	0	0	0	1	0	0	Altered
P-0009017	Male	77	PD-1/PDL-1	Non-Small Cell Lung Cancer	33.2765	10	0	0	0	1	0	0	0	0	Altered
P-0009019	Male	68	PD-1/PDL-1	Melanoma	2.93616	13	1	0	0	0	0	0	0	0	Unaltered
P-0009020	Female	74	PD-1/PDL-1	Non-Small Cell Lung Cancer	12.7234	8	1	0	0	1	0	0	0	0	Altered
P-0009057	Female	71	PD-1/PDL-1	Esophagogastric Cancer	42.0849	10	1	1	1	0	1	0	0	0	Altered
P-0009066	Male	51	PD-1/PDL-1	Esophagogastric Cancer	9.7872	5	1	0	0	0	0	0	0	0	Unaltered
P-0009068	Female	74	PD-1/PDL-1	Non-Small Cell Lung Cancer	19.5744	22	0	0	1	0	0	0	0	0	Altered
P-0009072	Male	56	Combo	Melanoma	3.91488	24	0	0	0	0	0	0	0	0	Unaltered
P-0009074	Female	66	Combo	Melanoma	2.93616	14	1	0	0	0	0	0	0	0	Unaltered
P-0009080	Male	74	PD-1/PDL-1	Non-Small Cell Lung Cancer	5.87232	7	1	0	0	0	0	0	0	0	Unaltered
P-0009084	Male	51	Combo	Melanoma	3.91488	18	1	0	0	0	0	0	0	0	Unaltered
P-0009088	Male	56	PD-1/PDL-1	Esophagogastric Cancer	4.8936	2	1	0	1	0	0	1	0	0	Altered
P-0009100	Male	56	PD-1/PDL-1	Esophagogastric Cancer	2.93616	2	1	0	0	0	0	0	0	0	Unaltered
P-0009101	Male	58	PD-1/PDL-1	Bladder Cancer	8.80848	20	0	0	0	0	0	0	0	0	Unaltered
P-0009105	Female	66	CTLA4	Melanoma	32.2978	39	0	0	0	0	0	0	0	0	Unaltered
P-0009106	Female	68	Combo	Melanoma	12.7234	31	0	0	0	0	0	0	0	0	Unaltered
P-0009108	Male	69	Combo	Melanoma	38.1701	20	0	0	0	0	0	0	0	0	Unaltered
P-0009119	Male	67	PD-1/PDL-1	Glioma	6.85104	18	1	0	0	0	0	0	0	0	Unaltered
P-0009148	Male	47	CTLA4	Melanoma	14.6808	45	0	0	0	0	0	0	0	0	Unaltered
P-0009152	Male	51	PD-1/PDL-1	Bladder Cancer	58.7232	25	0	1	0	0	0	1	0	0	Altered
P-0009161	Female	63	PD-1/PDL-1	Non-Small Cell Lung Cancer	10.7659	13	0	0	0	0	0	0	0	0	Unaltered
P-0009177	Female	56	Combo	Melanoma	5.87232	8	1	0	0	0	0	1	0	0	Altered
P-0009180	Female	41	Combo	Melanoma	1.95744	4	1	0	0	0	0	0	0	0	Unaltered
P-0009188	Male	81	Combo	Head and Neck Cancer	6.85104	27	0	0	0	0	0	0	0	0	Unaltered
P-0009189	Male	81	Combo	Melanoma	66.5529	24	0	1	1	0	0	1	0	0	Altered
P-0009202	Male	66	PD-1/PDL-1	Head and Neck Cancer	11.7446	15	0	0	0	0	0	0	0	0	Unaltered
P-0009245	Male	88	PD-1/PDL-1	Melanoma	23.4893	11	1	0	0	0	0	0	0	0	Unaltered
P-0009256	Female	76	PD-1/PDL-1	Non-Small Cell Lung Cancer	9.7872	26	0	0	0	0	0	0	0	0	Unaltered
P-0009263	Male	39	Combo	Bladder Cancer	23.4893	12	1	0	0	0	0	0	0	0	Unaltered
P-0009274	Female	77	Combo	Non-Small Cell Lung Cancer	3.91488	7	1	0	0	0	0	0	0	0	Unaltered
P-0009292	Male	60	PD-1/PDL-1	Melanoma	7.82976	24	0	0	0	0	0	0	0	0	Unaltered
P-0009293	Female	81	PD-1/PDL-1	Non-Small Cell Lung Cancer	21.5318	25	0	0	0	0	0	0	0	0	Unaltered
P-0009297	Female	40	PD-1/PDL-1	Breast Cancer	8.80848	14	1	0	0	0	0	0	0	0	Unaltered
P-0009308	Female	48	Combo	Melanoma	0.97872	22	0	0	0	0	0	0	0	0	Unaltered
P-0009311	Female	73	Combo	Melanoma	31.319	7	1	0	0	1	0	0	0	0	Altered
P-0009319	Male	64	Combo	Non-Small Cell Lung Cancer	1.95744	35	0	0	0	0	0	0	0	0	Unaltered
P-0009324	Male	87	PD-1/PDL-1	Melanoma	22.5106	21	0	0	0	0	0	0	0	0	Unaltered
P-0009337	Male	72	PD-1/PDL-1	Esophagogastric Cancer	3.91488	1	1	0	0	0	0	0	0	0	Unaltered
P-0009345	Female	55	Combo	Melanoma	1.95744	23	0	0	0	0	0	0	0	0	Unaltered
P-0009347	Male	72	Combo	Renal Cell Carcinoma	9.7872	25	0	0	0	0	0	0	0	0	Unaltered
P-0009348	Male	54	Combo	Renal Cell Carcinoma	3.91488	30	0	0	0	0	1	0	0	0	Altered
P-0009349	Female	88	PD-1/PDL-1	Melanoma	34.2552	21	0	0	0	0	0	0	0	0	Unaltered
P-0009363	Female	63	PD-1/PDL-1	Colorectal Cancer	6.85104	4	1	0	0	0	0	0	0	0	Unaltered
P-0009364	Female	63	PD-1/PDL-1	Breast Cancer	28.3829	19	0	0	0	1	0	0	0	0	Altered
P-0009365	Female	53	PD-1/PDL-1	Glioma	3.91488	9	1	0	0	0	0	0	0	0	Unaltered
P-0009368	Male	52	Combo	Esophagogastric Cancer	1.95744	38	0	0	0	0	0	0	0	0	Unaltered
P-0009370	Female	67	PD-1/PDL-1	Non-Small Cell Lung Cancer	8.80848	1	0	0	0	0	0	1	0	0	Altered
P-0009379	Male	69	PD-1/PDL-1	Non-Small Cell Lung Cancer	9.7872	1	1	0	0	0	0	1	0	0	Altered
P-0009411	Female	52	PD-1/PDL-1	Glioma	61.6593	21	1	0	0	1	0	0	1	1	Altered
P-0009414	Male	58	PD-1/PDL-1	Bladder Cancer	2.93616	9	1	0	0	0	0	0	0	0	Unaltered
P-0009419	Male	61	PD-1/PDL-1	Non-Small Cell Lung Cancer	12.7234	20	0	0	0	0	0	0	0	0	Unaltered
P-0009426	Female	65	PD-1/PDL-1	Non-Small Cell Lung Cancer	9.7872	11	1	0	0	0	0	0	0	0	Unaltered
P-0009431	Female	74	PD-1/PDL-1	Non-Small Cell Lung Cancer	8.80848	1	1	0	0	0	0	0	0	0	Unaltered
P-0009435	Female	66	PD-1/PDL-1	Melanoma	0.97872	20	0	0	0	0	0	0	0	0	Unaltered
P-0009451	Male	69	PD-1/PDL-1	Glioma	4.8936	13	1	0	0	0	0	0	0	0	Unaltered
P-0009453	Female	64	PD-1/PDL-1	Glioma	2.93616	7	1	0	0	0	0	0	0	0	Unaltered
P-0009469	Female	32	PD-1/PDL-1	Non-Small Cell Lung Cancer	2.93616	3	0	0	0	0	0	0	0	0	Unaltered
P-0009473	Male	80	PD-1/PDL-1	Non-Small Cell Lung Cancer	8.80848	23	0	0	0	0	0	0	0	0	Unaltered
P-0009476	Female	58	PD-1/PDL-1	Non-Small Cell Lung Cancer	7.82976	5	1	0	0	1	0	0	0	0	Altered
P-0009483	Female	82	PD-1/PDL-1	Non-Small Cell Lung Cancer	9.7872	9	1	0	0	0	0	0	0	0	Unaltered
P-0009497	Male	71	CTLA4	Melanoma	2.93616	56	0	0	0	0	0	0	0	0	Unaltered
P-0009498	Female	54	PD-1/PDL-1	Breast Cancer	4.8936	13	0	0	0	0	0	0	0	0	Unaltered
P-0009499	Male	36	PD-1/PDL-1	Glioma	50.8934	5	1	0	0	1	1	1	0	0	Altered
P-0009501	Male	73	PD-1/PDL-1	Non-Small Cell Lung Cancer	5.87232	23	1	0	0	0	0	0	0	0	Unaltered
P-0009505	Female	63	PD-1/PDL-1	Non-Small Cell Lung Cancer	2.93616	3	1	0	0	0	0	0	0	0	Unaltered
P-0009517	Male	79	PD-1/PDL-1	Renal Cell Carcinoma	4.8936	23	1	0	0	0	1	0	0	1	Altered
P-0009521	Female	75	PD-1/PDL-1	Cancer of Unknown Primary	1.95744	7	1	0	0	0	0	0	0	0	Unaltered
P-0009526	Male	69	PD-1/PDL-1	Non-Small Cell Lung Cancer	11.7446	5	1	0	0	0	0	0	0	0	Unaltered
P-0009527	Female	42	Combo	Melanoma	12.7234	19	0	0	0	0	0	1	0	0	Altered
P-0009532	Male	59	PD-1/PDL-1	Non-Small Cell Lung Cancer	10.7659	2	1	0	0	0	0	0	1	0	Altered
P-0009539	Female	73	PD-1/PDL-1	Non-Small Cell Lung Cancer	0	1	1	0	0	0	0	0	0	0	Unaltered
P-0009563	Male	57	PD-1/PDL-1	Esophagogastric Cancer	8.80848	1	1	0	0	0	0	0	0	0	Unaltered
P-0009586	Female	56	PD-1/PDL-1	Non-Small Cell Lung Cancer	11.7446	24	0	0	0	0	0	0	0	0	Unaltered
P-0009588	Male	35	PD-1/PDL-1	Head and Neck Cancer	2.93616	8	1	0	0	0	0	0	0	0	Unaltered
P-0009638	Male	82	PD-1/PDL-1	Non-Small Cell Lung Cancer	18.5957	2	1	0	0	0	1	1	0	0	Altered
P-0009648	Male	58	PD-1/PDL-1	Melanoma	0.97872	15	1	0	0	0	0	0	0	0	Unaltered
P-0009655	Female	71	Combo	Non-Small Cell Lung Cancer	2.93616	56	0	0	0	0	0	0	0	0	Unaltered
P-0009660	Male	61	PD-1/PDL-1	Non-Small Cell Lung Cancer	23.4893	20	0	0	0	0	0	1	0	0	Altered
P-0009706	Male	53	PD-1/PDL-1	Renal Cell Carcinoma	22.5106	26	0	0	1	0	0	0	0	0	Altered
P-0009711	Male	60	PD-1/PDL-1	Glioma	2.93616	22	1	0	0	0	0	0	0	0	Unaltered
P-0009714	Male	60	PD-1/PDL-1	Non-Small Cell Lung Cancer	19.5744	5	1	0	1	0	0	0	0	0	Altered
P-0009717	Male	51	PD-1/PDL-1	Renal Cell Carcinoma	3.91488	24	0	0	0	0	0	0	0	0	Unaltered
P-0009727	Female	44	CTLA4	Breast Cancer	0.97872	4	1	0	0	0	0	0	0	0	Unaltered
P-0009736	Male	64	Combo	Melanoma	13.7021	23	0	0	0	0	0	0	0	0	Unaltered
P-0009743	Male	68	PD-1/PDL-1	Bladder Cancer	0	2	1	0	0	0	0	0	0	0	Unaltered
P-0009747	Male	82	PD-1/PDL-1	Melanoma	24.468	19	1	0	0	1	0	0	0	0	Altered
P-0009756	Female	84	PD-1/PDL-1	Cancer of Unknown Primary	5.87232	4	1	0	0	0	0	1	0	0	Altered
P-0009762	Male	71	PD-1/PDL-1	Non-Small Cell Lung Cancer	7.82976	16	1	0	0	0	0	1	0	0	Altered
P-0009764	Female	51	PD-1/PDL-1	Non-Small Cell Lung Cancer	22.5106	16	0	0	0	0	0	0	0	0	Unaltered
P-0009788	Male	49	PD-1/PDL-1	Renal Cell Carcinoma	1.95744	24	0	0	0	0	0	0	0	0	Unaltered
P-0009790	Male	70	PD-1/PDL-1	Glioma	1.95744	16	1	0	1	0	0	0	0	0	Altered
P-0009830	Male	25	PD-1/PDL-1	Colorectal Cancer	44.0424	30	0	0	0	0	0	0	0	0	Unaltered
P-0009831	Female	68	PD-1/PDL-1	Melanoma	1.95744	15	1	0	0	0	0	0	0	0	Unaltered
P-0009833	Female	54	PD-1/PDL-1	Non-Small Cell Lung Cancer	32.2978	20	0	0	0	0	0	0	0	0	Unaltered
P-0009846	Male	77	PD-1/PDL-1	Bladder Cancer	11.7446	1	1	1	0	0	0	0	0	0	Altered
P-0009898	Male	85	PD-1/PDL-1	Bladder Cancer	7.82976	1	1	0	0	0	0	1	0	0	Altered
P-0009906	Male	53	PD-1/PDL-1	Renal Cell Carcinoma	3.91488	24	0	0	1	0	1	0	0	0	Altered
P-0009910	Female	70	PD-1/PDL-1	Bladder Cancer	13.7021	5	1	1	0	0	0	0	0	0	Altered
P-0009915	Male	59	PD-1/PDL-1	Non-Small Cell Lung Cancer	7.82976	7	1	0	1	0	0	0	0	0	Altered
P-0009918	Male	87	PD-1/PDL-1	Esophagogastric Cancer	61.6593	23	0	1	1	0	0	1	0	0	Altered
P-0009924	Male	79	PD-1/PDL-1	Non-Small Cell Lung Cancer	17.617	13	0	0	0	0	0	0	1	0	Altered
P-0009944	Female	72	Combo	Melanoma	1.95744	23	0	0	0	0	0	0	0	0	Unaltered
P-0009950	Male	58	Combo	Melanoma	69.4891	24	0	0	0	0	0	1	0	0	Altered
P-0009959	Male	66	PD-1/PDL-1	Non-Small Cell Lung Cancer	2.93616	13	1	0	0	0	0	0	0	0	Unaltered
P-0009969	Male	59	PD-1/PDL-1	Head and Neck Cancer	2.93616	3	0	0	0	0	0	0	0	0	Unaltered
P-0010004	Female	45	PD-1/PDL-1	Glioma	2.93616	9	1	0	0	0	0	0	0	0	Unaltered
P-0010008	Male	67	Combo	Melanoma	4.8936	2	1	0	0	0	0	0	0	0	Unaltered
P-0010013	Male	77	PD-1/PDL-1	Non-Small Cell Lung Cancer	1.95744	3	1	0	0	0	0	0	0	0	Unaltered
P-0010024	Male	81	PD-1/PDL-1	Non-Small Cell Lung Cancer	3.91488	27	0	0	0	0	0	0	0	0	Unaltered
P-0010025	Female	58	PD-1/PDL-1	Non-Small Cell Lung Cancer	10.7659	10	1	0	0	0	0	0	0	0	Unaltered
P-0010046	Female	54	PD-1/PDL-1	Renal Cell Carcinoma	0.97872	11	1	0	0	0	0	0	0	0	Unaltered
P-0010065	Male	40	PD-1/PDL-1	Non-Small Cell Lung Cancer	1.95744	9	0	0	0	0	0	0	0	0	Unaltered
P-0010079	Male	72	PD-1/PDL-1	Bladder Cancer	2.93616	15	0	0	0	0	0	0	0	0	Unaltered
P-0010082	Male	77	PD-1/PDL-1	Head and Neck Cancer	3.91488	1	1	0	0	0	0	0	0	0	Unaltered
P-0010088	Male	61	PD-1/PDL-1	Head and Neck Cancer	12.7234	18	0	0	0	0	0	0	0	0	Unaltered
P-0010094	Male	54	PD-1/PDL-1	Bladder Cancer	2.93616	6	1	0	0	0	0	0	0	0	Unaltered
P-0010104	Male	34	PD-1/PDL-1	Head and Neck Cancer	4.8936	3	1	0	0	0	0	0	0	0	Unaltered
P-0010111	Female	35	CTLA4	Melanoma	1.95744	13	0	0	0	0	0	0	0	0	Unaltered
P-0010115	Male	53	PD-1/PDL-1	Melanoma	51.8721	23	0	0	0	1	1	0	0	0	Altered
P-0010140	Female	46	PD-1/PDL-1	Melanoma	0	21	0	0	0	0	0	0	0	0	Unaltered
P-0010161	Male	53	PD-1/PDL-1	Head and Neck Cancer	0	2	1	0	0	0	0	0	0	0	Unaltered
P-0010174	Male	68	PD-1/PDL-1	Head and Neck Cancer	10.7659	7	0	0	0	0	0	0	0	0	Unaltered
P-0010184	Female	59	PD-1/PDL-1	Renal Cell Carcinoma	2.93616	25	0	0	0	0	1	1	0	0	Altered
P-0010199	Male	56	PD-1/PDL-1	Bladder Cancer	16.6382	17	0	0	0	0	0	0	0	0	Unaltered
P-0010212	Male	62	PD-1/PDL-1	Renal Cell Carcinoma	3.91488	9	0	0	0	0	0	0	0	0	Unaltered
P-0010213	Female	51	PD-1/PDL-1	Non-Small Cell Lung Cancer	15.6595	25	0	0	0	0	0	0	0	0	Unaltered
P-0010215	Female	74	PD-1/PDL-1	Non-Small Cell Lung Cancer	6.85104	3	1	0	0	0	0	0	0	0	Unaltered
P-0010222	Male	72	PD-1/PDL-1	Head and Neck Cancer	2.93616	4	1	0	0	0	0	0	0	0	Unaltered
P-0010232	Male	52	Combo	Melanoma	13.7021	25	0	0	0	0	1	0	0	0	Altered
P-0010236	Male	64	Combo	Bladder Cancer	12.7234	25	0	0	0	0	0	0	0	0	Unaltered
P-0010238	Female	52	PD-1/PDL-1	Colorectal Cancer	7.82976	21	1	0	0	0	0	0	0	0	Unaltered
P-0010241	Female	41	PD-1/PDL-1	Head and Neck Cancer	65.5742	16	0	1	0	0	0	0	0	0	Altered
P-0010249	Male	66	CTLA4	Melanoma	19.5744	28	0	0	0	0	0	0	0	0	Unaltered
P-0010252	Female	53	PD-1/PDL-1	Breast Cancer	4.8936	18	0	0	0	0	0	0	0	0	Unaltered
P-0010254	Female	51	PD-1/PDL-1	Bladder Cancer	0.97872	3	1	0	0	0	0	0	0	0	Unaltered
P-0010256	Female	73	PD-1/PDL-1	Non-Small Cell Lung Cancer	3.91488	21	1	0	0	0	0	0	0	0	Unaltered
P-0010311	Male	60	Combo	Renal Cell Carcinoma	7.82976	34	0	0	0	0	0	0	0	0	Unaltered
P-0010312	Male	62	PD-1/PDL-1	Head and Neck Cancer	0.97872	29	1	0	0	0	0	0	0	0	Unaltered
P-0010317	Male	68	PD-1/PDL-1	Esophagogastric Cancer	2.93616	9	1	0	0	0	0	0	0	0	Unaltered
P-0010327	Male	53	Combo	Melanoma	0.97872	23	0	0	0	0	0	0	0	0	Unaltered
P-0010340	Male	52	CTLA4	Melanoma	51.8721	23	0	0	0	1	1	0	0	0	Altered
P-0010344	Male	52	PD-1/PDL-1	Glioma	2.93616	2	1	0	0	0	0	0	0	0	Unaltered
P-0010355	Female	69	PD-1/PDL-1	Non-Small Cell Lung Cancer	6.85104	1	1	0	0	0	0	0	0	0	Unaltered
P-0010362	Female	60	PD-1/PDL-1	Non-Small Cell Lung Cancer	2.93616	3	1	0	0	0	0	0	0	0	Unaltered
P-0010380	Male	74	PD-1/PDL-1	Glioma	5.87232	5	1	0	0	0	0	0	0	0	Unaltered
P-0010381	Male	47	PD-1/PDL-1	Cancer of Unknown Primary	1.95744	1	0	0	0	0	0	0	0	0	Unaltered
P-0010389	Male	69	PD-1/PDL-1	Non-Small Cell Lung Cancer	0	9	1	0	0	0	0	0	0	0	Unaltered
P-0010450	Male	73	PD-1/PDL-1	Head and Neck Cancer	8.80848	14	1	0	0	0	0	0	0	0	Unaltered
P-0010495	Female	71	PD-1/PDL-1	Melanoma	3.91488	2	1	0	0	0	0	0	0	0	Unaltered
P-0010499	Male	65	PD-1/PDL-1	Colorectal Cancer	151.702	2	1	1	1	1	1	0	0	0	Altered
P-0010501	Male	71	PD-1/PDL-1	Esophagogastric Cancer	9.7872	4	1	0	0	0	0	0	0	0	Unaltered
P-0010516	Female	42	PD-1/PDL-1	Glioma	2.93616	22	0	0	0	0	0	0	0	0	Unaltered
P-0010556	Male	50	PD-1/PDL-1	Glioma	0.97872	15	1	0	0	0	0	0	0	0	Unaltered
P-0010581	Male	75	PD-1/PDL-1	Colorectal Cancer	66.5529	30	0	1	1	0	0	0	0	0	Altered
P-0010587	Female	63	PD-1/PDL-1	Colorectal Cancer	84.1699	11	0	1	1	0	1	0	1	0	Altered
P-0010588	Female	80	PD-1/PDL-1	Head and Neck Cancer	4.8936	4	1	0	0	0	0	0	0	0	Unaltered
P-0010603	Male	62	PD-1/PDL-1	Renal Cell Carcinoma	4.8936	12	0	0	0	0	0	0	0	0	Unaltered
P-0010613	Female	75	PD-1/PDL-1	Glioma	8.80848	3	0	0	0	0	0	0	0	0	Unaltered
P-0010614	Female	62	PD-1/PDL-1	Melanoma	1.95744	11	1	0	0	0	0	0	0	0	Unaltered
P-0010636	Male	68	PD-1/PDL-1	Non-Small Cell Lung Cancer	6.85104	16	1	0	0	0	0	0	0	0	Unaltered
P-0010644	Male	40	PD-1/PDL-1	Melanoma	0.97872	10	1	0	0	0	0	0	0	0	Unaltered
P-0010645	Male	53	PD-1/PDL-1	Non-Small Cell Lung Cancer	3.91488	3	1	0	0	0	0	0	0	0	Unaltered
P-0010648	Male	73	PD-1/PDL-1	Non-Small Cell Lung Cancer	1.95744	18	1	0	0	0	0	0	0	0	Unaltered
P-0010669	Female	66	CTLA4	Breast Cancer	3.91488	2	0	0	0	0	0	0	0	0	Unaltered
P-0010670	Male	71	Combo	Melanoma	12.7234	13	0	0	0	0	0	0	0	0	Unaltered
P-0010707	Male	79	PD-1/PDL-1	Head and Neck Cancer	3.91488	15	1	0	0	0	0	0	0	0	Unaltered
P-0010715	Male	67	Combo	Non-Small Cell Lung Cancer	49.9147	15	0	0	0	0	0	1	0	0	Altered
P-0010736	Male	80	PD-1/PDL-1	Non-Small Cell Lung Cancer	25.4467	18	1	1	0	0	0	0	0	0	Altered
P-0010737	Male	56	CTLA4	Melanoma	2.93616	22	1	0	0	0	0	0	0	0	Unaltered
P-0010742	Female	51	PD-1/PDL-1	Colorectal Cancer	4.8936	15	1	0	0	0	0	0	0	0	Unaltered
P-0010744	Female	52	PD-1/PDL-1	Glioma	98.8507	5	0	0	0	1	1	0	0	0	Altered
P-0010755	Male	62	PD-1/PDL-1	Head and Neck Cancer	1.95744	2	1	0	0	0	0	0	0	0	Unaltered
P-0010760	Male	51	PD-1/PDL-1	Non-Small Cell Lung Cancer	4.8936	22	0	0	0	0	0	0	0	0	Unaltered
P-0010791	Male	51	PD-1/PDL-1	Renal Cell Carcinoma	3.91488	24	0	0	0	0	0	0	0	0	Unaltered
P-0010800	Female	64	CTLA4	Breast Cancer	3.91488	10	1	0	0	0	0	0	0	0	Unaltered
P-0010816	Male	51	PD-1/PDL-1	Head and Neck Cancer	7.82976	7	1	0	0	0	0	0	0	0	Unaltered
P-0010818	Male	85	PD-1/PDL-1	Melanoma	15.6595	10	1	0	0	0	0	0	0	0	Unaltered
P-0010825	Male	42	PD-1/PDL-1	Esophagogastric Cancer	0	8	0	0	0	0	0	0	0	0	Unaltered
P-0010826	Male	60	PD-1/PDL-1	Bladder Cancer	3.91488	7	0	0	0	0	0	0	0	0	Unaltered
P-0010840	Female	55	PD-1/PDL-1	Non-Small Cell Lung Cancer	10.7659	2	1	0	0	0	0	0	0	0	Unaltered
P-0010847	Male	59	PD-1/PDL-1	Melanoma	19.5744	22	0	0	0	0	0	0	0	0	Unaltered
P-0010855	Female	74	PD-1/PDL-1	Non-Small Cell Lung Cancer	6.85104	7	1	0	0	0	0	0	0	0	Unaltered
P-0010891	Female	42	Combo	Non-Small Cell Lung Cancer	0.97872	2	1	0	0	0	0	0	0	0	Unaltered
P-0010915	Female	70	PD-1/PDL-1	Melanoma	18.5957	13	1	0	0	0	0	0	0	0	Unaltered
P-0010921	Male	62	PD-1/PDL-1	Bladder Cancer	45.9998	11	1	0	1	0	0	1	0	0	Altered
P-0010937	Male	79	CTLA4	Melanoma	36.2126	12	1	0	1	0	0	0	0	0	Altered
P-0010945	Male	52	PD-1/PDL-1	Non-Small Cell Lung Cancer	0	1	1	0	0	0	0	0	0	0	Unaltered
P-0010963	Male	61	PD-1/PDL-1	Renal Cell Carcinoma	0.97872	3	1	0	0	0	0	0	0	0	Unaltered
P-0010966	Male	48	PD-1/PDL-1	Colorectal Cancer	3.91488	4	0	0	0	0	0	0	0	0	Unaltered
P-0010986	Female	55	PD-1/PDL-1	Non-Small Cell Lung Cancer	7.82976	2	1	1	0	0	0	0	0	0	Altered
P-0010994	Female	52	PD-1/PDL-1	Breast Cancer	3.91488	4	1	0	0	0	0	0	0	0	Unaltered
P-0011012	Male	74	PD-1/PDL-1	Non-Small Cell Lung Cancer	3.91488	3	1	0	0	0	0	0	0	0	Unaltered
P-0011030	Male	70	PD-1/PDL-1	Non-Small Cell Lung Cancer	0.97872	1	1	0	0	0	0	0	0	0	Unaltered
P-0011033	Female	62	PD-1/PDL-1	Non-Small Cell Lung Cancer	1.95744	11	1	0	0	0	0	0	0	0	Unaltered
P-0011036	Male	56	PD-1/PDL-1	Non-Small Cell Lung Cancer	11.7446	4	1	0	0	0	0	0	0	0	Unaltered
P-0011047	Female	81	PD-1/PDL-1	Melanoma	35.2339	18	0	1	1	0	1	0	0	0	Altered
P-0011068	Male	62	PD-1/PDL-1	Colorectal Cancer	43.0637	9	0	0	0	0	1	1	0	0	Altered
P-0011071	Male	60	PD-1/PDL-1	Colorectal Cancer	80.255	2	1	1	1	1	0	1	1	1	Altered
P-0011095	Male	50	PD-1/PDL-1	Renal Cell Carcinoma	0	24	0	0	0	0	0	0	0	0	Unaltered
P-0011097	Male	79	PD-1/PDL-1	Renal Cell Carcinoma	5.87232	17	0	0	0	0	1	0	0	0	Altered
P-0011119	Female	66	PD-1/PDL-1	Glioma	0.97872	20	1	0	0	0	0	0	0	0	Unaltered
P-0011144	Female	26	PD-1/PDL-1	Colorectal Cancer	4.8936	4	1	0	0	0	0	0	0	0	Unaltered
P-0011149	Female	59	PD-1/PDL-1	Cancer of Unknown Primary	11.7446	7	1	0	0	0	0	0	0	0	Unaltered
P-0011162	Male	68	PD-1/PDL-1	Renal Cell Carcinoma	3.91488	12	1	0	0	0	1	0	0	0	Altered
P-0011180	Female	61	PD-1/PDL-1	Non-Small Cell Lung Cancer	1.95744	7	0	0	0	0	0	0	0	0	Unaltered
P-0011187	Male	69	PD-1/PDL-1	Bladder Cancer	8.80848	9	1	0	0	0	0	0	0	0	Unaltered
P-0011192	Female	74	PD-1/PDL-1	Non-Small Cell Lung Cancer	10.7659	2	0	0	0	0	0	0	0	0	Unaltered
P-0011195	Female	38	PD-1/PDL-1	Colorectal Cancer	2.93616	5	1	0	0	0	0	0	0	0	Unaltered
P-0011219	Male	67	PD-1/PDL-1	Glioma	3.91488	13	1	0	0	0	0	0	0	0	Unaltered
P-0011244	Male	77	PD-1/PDL-1	Non-Small Cell Lung Cancer	2.93616	3	1	0	0	0	0	0	0	0	Unaltered
P-0011245	Male	64	PD-1/PDL-1	Bladder Cancer	1.95744	4	1	0	0	0	0	0	0	0	Unaltered
P-0011246	Female	63	Combo	Renal Cell Carcinoma	2.93616	5	0	0	0	0	1	0	0	0	Altered
P-0011288	Female	71	Combo	Colorectal Cancer	10.7659	4	0	0	1	0	0	0	0	0	Altered
P-0011297	Male	46	CTLA4	Melanoma	3.91488	66	0	0	0	0	0	0	0	0	Unaltered
P-0011357	Male	53	PD-1/PDL-1	Colorectal Cancer	199.659	17	0	1	0	0	0	0	0	1	Altered
P-0011378	Male	68	PD-1/PDL-1	Non-Small Cell Lung Cancer	8.80848	2	1	0	0	0	0	0	0	0	Unaltered
P-0011401	Female	53	PD-1/PDL-1	Glioma	2.93616	19	1	0	0	0	0	0	0	0	Unaltered
P-0011418	Male	67	PD-1/PDL-1	Renal Cell Carcinoma	3.91488	22	0	0	0	0	0	0	0	0	Unaltered
P-0011439	Male	76	PD-1/PDL-1	Bladder Cancer	21.5318	3	1	1	0	1	0	0	0	0	Altered
P-0011440	Male	62	PD-1/PDL-1	Bladder Cancer	27.4042	2	1	0	0	0	0	1	0	0	Altered
P-0011453	Male	66	PD-1/PDL-1	Non-Small Cell Lung Cancer	5.87232	1	1	0	0	0	0	0	0	0	Unaltered
P-0011476	Male	49	PD-1/PDL-1	Melanoma	6.85104	16	0	0	0	0	0	1	0	0	Altered
P-0011499	Female	71	PD-1/PDL-1	Non-Small Cell Lung Cancer	7.82976	6	1	0	0	0	0	1	0	0	Altered
P-0011508	Male	62	PD-1/PDL-1	Non-Small Cell Lung Cancer	6.85104	1	1	0	0	0	0	0	0	0	Unaltered
P-0011522	Female	81	PD-1/PDL-1	Renal Cell Carcinoma	6.85104	16	0	0	0	0	1	1	0	0	Altered
P-0011523	Female	64	PD-1/PDL-1	Bladder Cancer	5.87232	21	0	1	0	0	0	0	0	0	Altered
P-0011535	Female	73	PD-1/PDL-1	Non-Small Cell Lung Cancer	2.93616	8	1	0	0	0	0	0	0	0	Unaltered
P-0011538	Male	50	PD-1/PDL-1	Cancer of Unknown Primary	0.97872	3	1	0	0	0	0	0	0	0	Unaltered
P-0011541	Female	77	PD-1/PDL-1	Non-Small Cell Lung Cancer	3.91488	13	0	0	0	0	0	0	0	0	Unaltered
P-0011546	Female	62	PD-1/PDL-1	Non-Small Cell Lung Cancer	9.7872	3	0	0	0	0	0	0	0	0	Unaltered
P-0011552	Female	73	PD-1/PDL-1	Breast Cancer	5.87232	4	1	0	0	0	0	0	0	0	Unaltered
P-0011559	Male	73	PD-1/PDL-1	Non-Small Cell Lung Cancer	3.91488	7	1	0	0	0	0	0	0	0	Unaltered
P-0012037	Male	77	PD-1/PDL-1	Bladder Cancer	4.8936	3	1	0	0	0	0	0	0	0	Unaltered
P-0012040	Male	66	PD-1/PDL-1	Renal Cell Carcinoma	3.91488	5	1	0	0	0	0	0	0	0	Unaltered
P-0012049	Female	68	PD-1/PDL-1	Non-Small Cell Lung Cancer	10.7659	11	0	0	0	0	0	0	0	0	Unaltered
P-0012080	Male	59	CTLA4	Melanoma	24.468	21	0	0	0	0	0	0	0	0	Unaltered
P-0012102	Male	62	PD-1/PDL-1	Renal Cell Carcinoma	3.91488	9	1	0	0	0	1	0	0	0	Altered
P-0012107	Male	66	PD-1/PDL-1	Head and Neck Cancer	11.7446	21	0	1	0	0	0	0	0	0	Altered
P-0012115	Male	49	PD-1/PDL-1	Colorectal Cancer	53.8296	19	0	1	1	1	0	0	0	0	Altered
P-0012133	Male	39	Combo	Colorectal Cancer	3.91488	12	1	0	0	0	0	0	0	0	Unaltered
P-0012137	Female	80	PD-1/PDL-1	Renal Cell Carcinoma	0	4	1	0	0	0	0	0	0	0	Unaltered
P-0012183	Male	77	PD-1/PDL-1	Bladder Cancer	7.82976	16	0	1	0	0	0	0	0	0	Altered
P-0012188	Male	70	PD-1/PDL-1	Cancer of Unknown Primary	20.5531	18	0	0	0	0	0	0	0	0	Unaltered
P-0012189	Female	59	PD-1/PDL-1	Head and Neck Cancer	8.80848	2	1	0	0	0	0	0	0	0	Unaltered
P-0012221	Male	54	PD-1/PDL-1	Renal Cell Carcinoma	3.91488	23	0	0	0	0	1	0	0	0	Altered
P-0012249	Female	64	PD-1/PDL-1	Colorectal Cancer	37.1913	12	0	1	0	0	0	0	0	0	Altered
P-0012256	Male	69	PD-1/PDL-1	Renal Cell Carcinoma	6.85104	24	0	0	0	0	1	0	0	0	Altered
P-0012267	Female	72	Combo	Renal Cell Carcinoma	3.91488	45	0	0	0	0	0	0	0	0	Unaltered
P-0012279	Male	64	PD-1/PDL-1	Renal Cell Carcinoma	8.80848	14	1	0	0	0	1	0	0	0	Altered
P-0012281	Male	39	PD-1/PDL-1	Colorectal Cancer	2.93616	10	0	0	0	0	0	0	0	0	Unaltered
P-0012282	Male	70	CTLA4	Melanoma	9.7872	17	0	0	0	0	0	0	0	0	Unaltered
P-0012315	Female	62	PD-1/PDL-1	Melanoma	11.7446	18	0	0	0	0	0	0	0	0	Unaltered
P-0012323	Female	47	PD-1/PDL-1	Renal Cell Carcinoma	4.8936	5	1	0	0	0	0	0	0	0	Unaltered
P-0012341	Female	72	PD-1/PDL-1	Non-Small Cell Lung Cancer	5.87232	3	1	1	0	0	0	0	0	0	Altered
P-0012361	Male	71	PD-1/PDL-1	Melanoma	45.0211	16	1	0	0	0	0	1	0	0	Altered
P-0012370	Male	68	PD-1/PDL-1	Head and Neck Cancer	0.97872	14	1	0	0	0	0	0	0	0	Unaltered
P-0012408	Male	83	PD-1/PDL-1	Melanoma	14.6808	17	0	0	0	0	0	0	0	0	Unaltered
P-0012420	Male	73	PD-1/PDL-1	Melanoma	10.7659	19	0	0	0	0	0	0	0	0	Unaltered
P-0012427	Male	67	PD-1/PDL-1	Non-Small Cell Lung Cancer	5.87232	7	1	0	0	0	0	0	0	0	Unaltered
P-0012446	Female	45	Combo	Melanoma	25.4467	20	0	0	0	0	0	0	0	0	Unaltered
P-0012516	Male	63	PD-1/PDL-1	Renal Cell Carcinoma	3.91488	22	0	0	0	0	0	0	0	0	Unaltered
P-0012519	Male	61	PD-1/PDL-1	Renal Cell Carcinoma	4.8936	22	0	0	0	0	1	0	0	0	Altered
P-0012529	Male	48	PD-1/PDL-1	Melanoma	10.7659	4	1	0	0	0	0	0	0	0	Unaltered
P-0012550	Female	60	PD-1/PDL-1	Melanoma	57.7445	16	0	1	1	1	0	0	1	0	Altered
P-0012551	Female	61	CTLA4	Melanoma	10.7659	20	0	0	0	0	0	0	0	0	Unaltered
P-0012629	Male	82	PD-1/PDL-1	Non-Small Cell Lung Cancer	2.93616	18	1	0	0	0	0	0	0	0	Unaltered
P-0012678	Male	73	PD-1/PDL-1	Non-Small Cell Lung Cancer	23.4893	20	0	0	0	0	0	0	0	0	Unaltered
P-0012682	Male	59	PD-1/PDL-1	Renal Cell Carcinoma	4.8936	23	0	0	0	0	1	0	0	0	Altered
P-0012687	Male	80	PD-1/PDL-1	Glioma	3.91488	10	1	0	0	0	0	0	0	0	Unaltered
P-0012706	Male	80	PD-1/PDL-1	Bladder Cancer	1.95744	22	0	0	0	0	0	0	0	0	Unaltered
P-0012708	Female	52	Combo	Colorectal Cancer	4.8936	5	0	0	0	0	0	0	0	0	Unaltered
P-0012720	Male	25	Combo	Esophagogastric Cancer	2.93616	1	1	0	0	0	0	0	0	0	Unaltered
P-0012728	Female	61	PD-1/PDL-1	Colorectal Cancer	9.7872	7	1	0	0	0	0	0	0	0	Unaltered
P-0012729	Male	69	PD-1/PDL-1	Non-Small Cell Lung Cancer	6.85104	9	1	0	0	0	0	0	0	0	Unaltered
P-0012780	Female	61	Combo	Melanoma	6.85104	11	1	0	0	0	0	0	0	0	Unaltered
P-0012783	Male	62	Combo	Melanoma	17.617	30	0	0	0	0	0	0	0	0	Unaltered
P-0012803	Female	50	CTLA4	Breast Cancer	4.8936	3	0	0	0	0	0	0	0	0	Unaltered
P-0012817	Male	55	PD-1/PDL-1	Non-Small Cell Lung Cancer	33.2765	18	0	0	0	1	0	0	0	0	Altered
P-0012822	Female	77	Combo	Melanoma	0	2	1	0	0	0	0	0	0	0	Unaltered
P-0012825	Female	37	PD-1/PDL-1	Breast Cancer	0.864698	14	0	0	0	0	0	0	0	0	Unaltered
P-0012840	Male	81	PD-1/PDL-1	Bladder Cancer	5.87232	15	1	1	0	0	0	0	0	0	Altered
P-0012846	Female	59	PD-1/PDL-1	Non-Small Cell Lung Cancer	7.82976	20	0	0	0	0	0	0	0	0	Unaltered
P-0012849	Male	67	PD-1/PDL-1	Non-Small Cell Lung Cancer	9.7872	2	1	0	0	0	0	0	0	0	Unaltered
P-0012856	Male	58	PD-1/PDL-1	Melanoma	38.1701	18	0	0	0	0	1	0	0	0	Altered
P-0012860	Male	85	PD-1/PDL-1	Melanoma	93.9571	10	0	0	0	0	0	1	1	0	Altered
P-0012866	Female	51	PD-1/PDL-1	Non-Small Cell Lung Cancer	5.87232	19	1	0	0	0	0	0	0	0	Unaltered
P-0012869	Female	23	PD-1/PDL-1	Melanoma	4.8936	14	1	0	0	0	0	0	0	0	Unaltered
P-0012870	Male	72	PD-1/PDL-1	Bladder Cancer	8.64698	11	1	1	0	0	0	0	0	0	Altered
P-0012883	Male	63	PD-1/PDL-1	Head and Neck Cancer	15.6595	3	0	0	0	0	0	0	0	0	Unaltered
P-0012905	Male	20	Combo	Cancer of Unknown Primary	1.95744	16	0	0	0	0	0	0	0	0	Unaltered
P-0012908	Male	80	PD-1/PDL-1	Non-Small Cell Lung Cancer	6.85104	13	1	0	1	0	0	1	0	0	Altered
P-0012925	Male	74	PD-1/PDL-1	Non-Small Cell Lung Cancer	5.87232	10	1	0	0	0	0	0	0	0	Unaltered
P-0012931	Male	72	PD-1/PDL-1	Non-Small Cell Lung Cancer	9.7872	2	0	0	0	0	0	0	0	0	Unaltered
P-0012966	Female	57	PD-1/PDL-1	Melanoma	2.93616	12	1	0	0	0	0	0	0	0	Unaltered
P-0012968	Male	61	Combo	Melanoma	9.7872	19	0	0	0	0	0	0	0	0	Unaltered
P-0012993	Male	87	PD-1/PDL-1	Non-Small Cell Lung Cancer	5.87232	4	1	1	0	0	0	0	0	0	Altered
P-0012999	Male	71	Combo	Melanoma	20.5531	13	1	0	0	0	0	0	0	0	Unaltered
P-0013025	Male	60	CTLA4	Melanoma	12.7234	43	0	0	0	0	1	0	0	0	Altered
P-0013029	Male	42	PD-1/PDL-1	Glioma	30.3403	3	1	0	1	0	0	0	0	0	Altered
P-0013035	Female	47	CTLA4	Melanoma	3.91488	55	0	0	0	0	0	0	0	0	Unaltered
P-0013078	Female	42	PD-1/PDL-1	Renal Cell Carcinoma	2.93616	19	0	0	0	0	1	0	0	0	Altered
P-0013087	Male	60	Combo	Colorectal Cancer	6.85104	8	0	0	0	0	0	0	0	0	Unaltered
P-0013089	Female	67	PD-1/PDL-1	Renal Cell Carcinoma	5.87232	9	1	0	0	0	0	0	0	0	Unaltered
P-0013094	Female	73	PD-1/PDL-1	Cancer of Unknown Primary	7.82976	7	1	0	0	0	0	0	0	0	Unaltered
P-0013096	Male	37	PD-1/PDL-1	Colorectal Cancer	2.93616	19	0	0	0	0	0	0	0	0	Unaltered
P-0013106	Male	41	PD-1/PDL-1	Esophagogastric Cancer	14.6808	49	0	0	0	0	0	0	0	0	Unaltered
P-0013111	Male	70	PD-1/PDL-1	Melanoma	19.5744	20	0	1	0	0	0	0	0	0	Altered
P-0013147	Male	89	PD-1/PDL-1	Cancer of Unknown Primary	4.8936	9	1	0	0	0	0	0	0	0	Unaltered
P-0013189	Female	58	PD-1/PDL-1	Non-Small Cell Lung Cancer	1.95744	20	0	0	0	0	0	0	0	0	Unaltered
P-0013200	Female	69	Combo	Melanoma	1.95744	19	0	0	0	0	0	0	0	0	Unaltered
P-0013204	Male	63	PD-1/PDL-1	Glioma	2.93616	15	0	0	0	0	0	0	0	0	Unaltered
P-0013210	Female	59	PD-1/PDL-1	Breast Cancer	2.93616	3	1	0	0	0	0	0	0	0	Unaltered
P-0013232	Male	63	PD-1/PDL-1	Melanoma	46.9785	11	0	0	0	0	0	0	0	0	Unaltered
P-0013233	Female	70	PD-1/PDL-1	Non-Small Cell Lung Cancer	7.82976	13	0	0	0	0	0	0	0	0	Unaltered
P-0013240	Male	56	PD-1/PDL-1	Renal Cell Carcinoma	3.91488	9	1	0	0	0	1	0	0	0	Altered
P-0013243	Female	47	PD-1/PDL-1	Glioma	4.8936	8	1	0	0	1	0	0	0	0	Altered
P-0013259	Female	47	PD-1/PDL-1	Glioma	2.93616	13	1	0	0	0	0	0	0	0	Unaltered
P-0013274	Male	67	PD-1/PDL-1	Melanoma	6.85104	13	1	0	0	0	0	0	0	0	Unaltered
P-0013278	Male	79	PD-1/PDL-1	Head and Neck Cancer	7.82976	33	1	0	0	1	0	0	0	0	Altered
P-0013283	Male	49	PD-1/PDL-1	Bladder Cancer	6.85104	2	1	0	0	0	0	0	0	0	Unaltered
P-0013294	Female	57	PD-1/PDL-1	Glioma	2.93616	4	1	0	0	0	0	0	0	0	Unaltered
P-0013304	Male	72	PD-1/PDL-1	Bladder Cancer	0.97872	5	1	0	0	0	0	0	0	0	Unaltered
P-0013309	Female	83	Combo	Melanoma	0.97872	19	0	0	0	0	0	0	0	0	Unaltered
P-0013313	Male	79	PD-1/PDL-1	Melanoma	5.87232	11	1	0	0	0	0	0	0	0	Unaltered
P-0013314	Female	70	PD-1/PDL-1	Esophagogastric Cancer	0.97872	20	1	0	0	0	0	0	0	0	Unaltered
P-0013318	Male	67	PD-1/PDL-1	Melanoma	6.85104	18	0	0	0	0	0	0	0	0	Unaltered
P-0013335	Male	48	PD-1/PDL-1	Renal Cell Carcinoma	1.95744	6	1	0	0	0	1	0	0	0	Altered
P-0013343	Female	57	CTLA4	Melanoma	19.5744	60	1	0	0	1	0	0	0	0	Altered
P-0013347	Male	55	PD-1/PDL-1	Glioma	5.87232	14	1	0	0	0	0	0	0	0	Unaltered
P-0013354	Female	53	PD-1/PDL-1	Colorectal Cancer	4.8936	2	1	0	0	0	0	0	0	0	Unaltered
P-0013360	Male	51	PD-1/PDL-1	Glioma	4.8936	13	0	0	0	0	0	0	0	0	Unaltered
P-0013368	Male	61	PD-1/PDL-1	Renal Cell Carcinoma	1.95744	20	0	0	0	0	0	0	0	0	Unaltered
P-0013380	Male	58	PD-1/PDL-1	Glioma	1.95744	17	0	0	0	0	0	0	0	0	Unaltered
P-0013383	Female	84	Combo	Melanoma	45.9998	17	0	1	0	0	0	0	0	0	Altered
P-0013389	Male	69	PD-1/PDL-1	Melanoma	5.87232	18	0	0	0	0	0	0	0	0	Unaltered
P-0013412	Male	60	Combo	Melanoma	3.91488	13	0	0	0	0	0	0	0	0	Unaltered
P-0013413	Male	76	CTLA4	Melanoma	24.468	14	1	0	0	0	1	1	0	0	Altered
P-0013448	Male	83	PD-1/PDL-1	Melanoma	12.7234	19	0	0	0	0	0	0	0	0	Unaltered
P-0013451	Female	58	Combo	Melanoma	2.93616	17	0	0	0	0	0	0	0	0	Unaltered
P-0013462	Female	82	PD-1/PDL-1	Colorectal Cancer	43.0637	15	0	1	1	0	0	0	0	0	Altered
P-0013463	Male	60	PD-1/PDL-1	Renal Cell Carcinoma	4.8936	20	0	0	0	0	1	0	0	0	Altered
P-0013506	Female	57	PD-1/PDL-1	Glioma	55.787	8	0	0	0	0	0	1	1	0	Altered
P-0013525	Female	69	CTLA4	Melanoma	9.7872	19	0	0	0	0	0	0	0	0	Unaltered
P-0013544	Male	50	PD-1/PDL-1	Glioma	3.45879	13	1	0	1	0	0	0	0	0	Altered
P-0013596	Male	58	PD-1/PDL-1	Melanoma	9.7872	8	1	0	0	0	0	0	0	0	Unaltered
P-0013603	Male	53	PD-1/PDL-1	Glioma	1.95744	15	1	0	0	0	0	0	0	0	Unaltered
P-0013652	Male	59	PD-1/PDL-1	Head and Neck Cancer	8.80848	3	1	0	0	1	0	0	0	0	Altered
P-0013656	Female	55	PD-1/PDL-1	Non-Small Cell Lung Cancer	3.91488	5	1	0	0	0	0	0	0	0	Unaltered
P-0013659	Male	81	PD-1/PDL-1	Melanoma	9.7872	17	0	0	0	0	0	0	0	0	Unaltered
P-0013728	Male	62	Combo	Renal Cell Carcinoma	1.95744	46	0	0	0	0	0	0	0	0	Unaltered
P-0013765	Male	64	Combo	Melanoma	6.85104	15	0	0	0	0	0	0	0	0	Unaltered
P-0013814	Male	72	PD-1/PDL-1	Glioma	4.8936	15	0	0	0	0	0	0	0	0	Unaltered
P-0013826	Male	90	PD-1/PDL-1	Melanoma	162.467	1	0	0	0	0	1	1	0	0	Altered
P-0013845	Male	63	Combo	Melanoma	1.95744	28	0	0	0	0	0	0	0	0	Unaltered
P-0013854	Male	78	Combo	Melanoma	5.87232	33	1	0	0	0	0	0	0	0	Unaltered
P-0013861	Male	61	PD-1/PDL-1	Bladder Cancer	2.93616	7	0	0	0	0	0	0	0	0	Unaltered
P-0013873	Male	61	PD-1/PDL-1	Bladder Cancer	3.91488	7	1	0	0	0	0	0	0	0	Unaltered
P-0013892	Male	68	PD-1/PDL-1	Head and Neck Cancer	1.95744	16	1	0	0	0	0	0	0	0	Unaltered
P-0013920	Male	70	PD-1/PDL-1	Head and Neck Cancer	8.80848	8	1	0	0	0	0	1	0	0	Altered
P-0013923	Female	64	PD-1/PDL-1	Cancer of Unknown Primary	16.6382	13	0	0	1	0	1	0	0	0	Altered
P-0013938	Male	55	PD-1/PDL-1	Glioma	0.97872	21	1	0	0	0	0	0	0	0	Unaltered
P-0013951	Male	81	Combo	Melanoma	1.95744	10	1	0	0	0	0	0	0	0	Unaltered
P-0013956	Female	44	PD-1/PDL-1	Melanoma	5.87232	8	1	0	0	0	0	0	0	0	Unaltered
P-0013967	Male	60	PD-1/PDL-1	Renal Cell Carcinoma	7.82976	18	0	1	0	0	0	0	0	0	Altered
P-0014006	Male	63	PD-1/PDL-1	Glioma	0.97872	18	1	0	0	0	0	0	0	0	Unaltered
P-0014010	Female	36	PD-1/PDL-1	Colorectal Cancer	6.85104	3	1	0	0	0	0	0	0	0	Unaltered
P-0014015	Male	67	PD-1/PDL-1	Head and Neck Cancer	9.7872	19	0	0	0	0	0	0	0	0	Unaltered
P-0014022	Male	68	PD-1/PDL-1	Head and Neck Cancer	0	9	1	0	0	0	0	0	0	0	Unaltered
P-0014060	Female	66	PD-1/PDL-1	Head and Neck Cancer	5.87232	7	0	0	0	0	0	0	0	0	Unaltered
P-0014064	Male	60	PD-1/PDL-1	Renal Cell Carcinoma	1.95744	20	0	0	0	0	0	0	0	0	Unaltered
P-0014071	Male	66	PD-1/PDL-1	Glioma	4.8936	6	1	0	0	0	0	0	0	0	Unaltered
P-0014099	Female	77	PD-1/PDL-1	Glioma	2.93616	6	1	0	0	0	0	0	0	0	Unaltered
P-0014118	Male	28	Combo	Esophagogastric Cancer	0	2	1	0	0	0	0	0	0	0	Unaltered
P-0014124	Female	54	PD-1/PDL-1	Melanoma	0	13	0	0	0	0	0	0	0	0	Unaltered
P-0014137	Male	78	PD-1/PDL-1	Melanoma	24.468	9	0	0	0	0	0	0	0	0	Unaltered
P-0014147	Male	59	PD-1/PDL-1	Renal Cell Carcinoma	6.85104	10	1	0	0	0	1	0	0	0	Altered
P-0014148	Female	44	CTLA4	Melanoma	45.0211	80	0	1	0	0	0	0	0	0	Altered
P-0014159	Male	61	PD-1/PDL-1	Melanoma	19.5744	2	1	0	0	0	0	1	0	0	Altered
P-0014172	Male	83	PD-1/PDL-1	Non-Small Cell Lung Cancer	17.617	9	1	0	0	0	0	0	0	0	Unaltered
P-0014182	Male	66	PD-1/PDL-1	Colorectal Cancer	7.78228	2	0	1	0	0	0	0	0	0	Altered
P-0014206	Male	55	Combo	Melanoma	22.4822	17	0	0	0	0	0	0	0	0	Unaltered
P-0014207	Male	79	PD-1/PDL-1	Non-Small Cell Lung Cancer	6.91758	4	1	1	0	0	1	0	0	0	Altered
P-0014220	Male	63	PD-1/PDL-1	Glioma	4.32349	14	0	0	0	0	0	0	0	0	Unaltered
P-0014229	Female	45	PD-1/PDL-1	Melanoma	29.3997	16	0	0	0	0	0	1	0	0	Altered
P-0014236	Male	78	Combo	Melanoma	1.7294	17	0	0	0	0	0	0	0	0	Unaltered
P-0014242	Male	60	Combo	Melanoma	25.0762	18	0	0	0	0	1	0	0	0	Altered
P-0014269	Male	75	PD-1/PDL-1	Non-Small Cell Lung Cancer	0.864698	9	1	0	0	0	0	0	0	0	Unaltered
P-0014323	Female	45	PD-1/PDL-1	Cancer of Unknown Primary	13.8352	8	1	0	0	0	0	0	0	0	Unaltered
P-0014328	Female	61	Combo	Non-Small Cell Lung Cancer	4.32349	1	1	0	0	0	0	0	0	0	Unaltered
P-0014379	Male	48	PD-1/PDL-1	Melanoma	0.864698	17	0	0	0	0	0	0	0	0	Unaltered
P-0014402	Female	67	PD-1/PDL-1	Bladder Cancer	8.64698	2	1	0	0	0	0	0	0	0	Unaltered
P-0014418	Male	46	PD-1/PDL-1	Bladder Cancer	13.8352	5	1	1	0	0	0	0	0	0	Altered
P-0014421	Male	83	Combo	Bladder Cancer	4.32349	35	0	1	0	0	0	0	0	0	Altered
P-0014422	Female	74	PD-1/PDL-1	Bladder Cancer	17.294	11	0	0	1	0	0	1	0	0	Altered
P-0014449	Male	67	Combo	Melanoma	1.7294	11	1	0	0	0	0	0	0	0	Unaltered
P-0014451	Female	65	PD-1/PDL-1	Non-Small Cell Lung Cancer	9.51168	8	1	0	0	0	0	0	0	0	Unaltered
P-0014465	Male	34	PD-1/PDL-1	Head and Neck Cancer	7.78228	2	0	1	0	0	0	0	0	0	Altered
P-0014470	Male	80	PD-1/PDL-1	Bladder Cancer	20.7528	16	0	0	0	0	0	0	0	0	Unaltered
P-0014507	Female	56	Combo	Bladder Cancer	7.78228	6	0	1	0	0	0	0	0	0	Altered
P-0014513	Female	69	PD-1/PDL-1	Non-Small Cell Lung Cancer	2.59409	3	0	0	0	0	0	1	0	0	Altered
P-0014529	Female	65	PD-1/PDL-1	Non-Small Cell Lung Cancer	21.6175	16	0	0	0	0	0	0	0	0	Unaltered
P-0014556	Male	83	PD-1/PDL-1	Melanoma	16.4293	5	1	0	0	0	0	0	0	0	Unaltered
P-0014562	Male	71	PD-1/PDL-1	Non-Small Cell Lung Cancer	12.1058	6	0	0	0	0	0	0	0	0	Unaltered
P-0014565	Female	53	PD-1/PDL-1	Colorectal Cancer	6.05289	12	1	0	0	0	0	0	0	0	Unaltered
P-0014594	Male	61	PD-1/PDL-1	Renal Cell Carcinoma	2.59409	16	0	1	0	0	1	0	0	0	Altered
P-0014599	Male	63	PD-1/PDL-1	Non-Small Cell Lung Cancer	14.6999	17	0	0	0	0	0	0	0	0	Unaltered
P-0014600	Male	73	PD-1/PDL-1	Renal Cell Carcinoma	4.32349	1	1	0	0	0	0	1	0	0	Altered
P-0014619	Male	60	PD-1/PDL-1	Renal Cell Carcinoma	2.59409	18	0	0	0	0	0	0	0	0	Unaltered
P-0014648	Male	67	PD-1/PDL-1	Bladder Cancer	5.18819	21	0	0	0	0	0	0	0	0	Unaltered
P-0014666	Female	30	PD-1/PDL-1	Melanoma	0	17	0	0	0	0	0	0	0	0	Unaltered
P-0014677	Male	50	PD-1/PDL-1	Glioma	1.7294	17	0	0	0	0	0	0	0	0	Unaltered
P-0014682	Male	83	PD-1/PDL-1	Melanoma	0.864698	16	0	0	0	0	0	0	0	0	Unaltered
P-0014736	Male	63	PD-1/PDL-1	Non-Small Cell Lung Cancer	5.18819	1	1	0	0	0	0	1	0	0	Altered
P-0014772	Female	74	PD-1/PDL-1	Non-Small Cell Lung Cancer	8.64698	5	1	0	0	0	0	0	0	0	Unaltered
P-0014786	Female	65	PD-1/PDL-1	Non-Small Cell Lung Cancer	11.2411	6	1	1	0	0	1	0	0	0	Altered
P-0014815	Female	61	PD-1/PDL-1	Bladder Cancer	5.18819	7	1	0	0	0	0	0	0	0	Unaltered
P-0014818	Male	83	PD-1/PDL-1	Non-Small Cell Lung Cancer	28.535	12	1	0	0	0	0	0	0	0	Unaltered
P-0014898	Male	53	PD-1/PDL-1	Head and Neck Cancer	5.18819	2	1	0	0	0	0	0	0	0	Unaltered
P-0014909	Male	67	PD-1/PDL-1	Bladder Cancer	5.18819	4	1	0	0	0	0	0	0	0	Unaltered
P-0014910	Male	71	PD-1/PDL-1	Melanoma	32.8585	20	0	0	0	0	1	0	0	0	Altered
P-0014965	Male	53	PD-1/PDL-1	Head and Neck Cancer	1.7294	12	0	0	0	0	0	0	0	0	Unaltered
P-0014966	Male	66	PD-1/PDL-1	Melanoma	5.18819	17	0	0	0	0	0	0	0	0	Unaltered
P-0015007	Male	20	PD-1/PDL-1	Melanoma	6.05289	19	0	0	0	0	0	0	0	0	Unaltered
P-0015010	Male	85	PD-1/PDL-1	Melanoma	1.7294	13	0	0	0	0	0	0	0	0	Unaltered
P-0015047	Female	76	PD-1/PDL-1	Non-Small Cell Lung Cancer	12.9705	15	0	0	0	0	0	0	0	1	Altered
P-0015067	Male	72	PD-1/PDL-1	Bladder Cancer	7.78228	14	0	0	0	0	0	0	0	0	Unaltered
P-0015078	Female	71	PD-1/PDL-1	Non-Small Cell Lung Cancer	7.78228	25	0	1	0	0	0	0	0	0	Altered
P-0015085	Female	49	PD-1/PDL-1	Non-Small Cell Lung Cancer	6.91758	10	1	0	0	0	0	0	0	0	Unaltered
P-0015122	Female	75	PD-1/PDL-1	Melanoma	9.51168	2	0	0	0	0	0	0	0	0	Unaltered
P-0015137	Male	81	PD-1/PDL-1	Bladder Cancer	12.9705	17	1	1	0	0	0	0	0	0	Altered
P-0015177	Male	73	PD-1/PDL-1	Non-Small Cell Lung Cancer	7.78228	1	1	0	0	0	0	0	0	0	Unaltered
P-0015182	Male	83	PD-1/PDL-1	Melanoma	3.45879	17	0	0	0	0	0	0	0	0	Unaltered
P-0015186	Female	76	PD-1/PDL-1	Bladder Cancer	11.2411	3	1	0	0	0	0	0	0	0	Unaltered
P-0015214	Female	74	PD-1/PDL-1	Non-Small Cell Lung Cancer	24.2115	13	1	0	0	0	0	0	0	0	Unaltered
P-0015237	Female	75	PD-1/PDL-1	Colorectal Cancer	51.8819	12	0	0	0	0	1	1	0	0	Altered
P-0015251	Male	66	Combo	Esophagogastric Cancer	8.64698	6	1	0	0	0	0	0	0	0	Unaltered
P-0015257	Female	68	PD-1/PDL-1	Melanoma	58.7995	14	0	1	0	1	0	1	0	0	Altered
P-0015259	Male	88	PD-1/PDL-1	Non-Small Cell Lung Cancer	2.59409	14	0	0	0	0	0	0	0	0	Unaltered
P-0015289	Male	23	PD-1/PDL-1	Glioma	2.59409	16	0	0	0	0	0	0	0	0	Unaltered
P-0015296	Male	69	PD-1/PDL-1	Non-Small Cell Lung Cancer	19.8881	15	0	0	0	0	0	1	0	0	Altered
P-0015331	Male	46	Combo	Esophagogastric Cancer	17.294	1	1	0	0	0	0	0	0	0	Unaltered
P-0015342	Male	61	PD-1/PDL-1	Renal Cell Carcinoma	1.7294	18	0	0	0	0	1	0	0	0	Altered
P-0015344	Male	61	PD-1/PDL-1	Bladder Cancer	56.2054	6	0	1	1	0	1	1	1	0	Altered
P-0015346	Female	45	PD-1/PDL-1	Glioma	1.7294	8	0	0	0	0	0	0	0	0	Unaltered
P-0015348	Male	63	PD-1/PDL-1	Non-Small Cell Lung Cancer	10.3764	15	0	0	0	0	0	0	0	0	Unaltered
P-0015373	Male	34	Combo	Melanoma	29.3997	17	0	0	0	0	0	0	0	0	Unaltered
P-0015407	Male	66	Combo	Melanoma	33.7232	20	0	0	0	0	1	0	0	0	Altered
P-0015415	Male	66	Combo	Melanoma	77.8228	5	1	0	1	0	0	0	0	0	Altered
P-0015433	Male	68	PD-1/PDL-1	Renal Cell Carcinoma	0.864698	13	0	1	0	0	0	0	0	0	Altered
P-0015438	Male	73	Combo	Melanoma	66.5818	15	0	0	0	1	1	1	0	0	Altered
P-0015445	Female	60	PD-1/PDL-1	Breast Cancer	2.59409	2	1	0	0	0	0	0	0	0	Unaltered
P-0015456	Female	43	PD-1/PDL-1	Bladder Cancer	6.05289	10	0	0	0	0	0	0	0	0	Unaltered
P-0015471	Male	70	PD-1/PDL-1	Melanoma	1.7294	13	0	0	0	0	0	0	0	0	Unaltered
P-0015501	Male	69	PD-1/PDL-1	Bladder Cancer	14.6999	14	1	0	0	0	0	0	0	0	Unaltered
P-0015511	Male	33	Combo	Melanoma	12.9705	15	0	0	0	0	0	0	0	0	Unaltered
P-0015512	Male	85	PD-1/PDL-1	Melanoma	96.8462	16	0	0	1	1	0	0	0	0	Altered
P-0015521	Male	54	PD-1/PDL-1	Melanoma	19.0234	15	0	0	0	0	0	0	0	0	Unaltered
P-0015530	Male	54	PD-1/PDL-1	Melanoma	5.18819	15	0	0	0	0	0	0	0	0	Unaltered
P-0015531	Female	54	PD-1/PDL-1	Non-Small Cell Lung Cancer	4.32349	9	1	0	0	0	0	0	0	0	Unaltered
P-0015556	Male	67	PD-1/PDL-1	Non-Small Cell Lung Cancer	4.32349	30	0	0	0	0	0	0	0	0	Unaltered
P-0015573	Male	59	PD-1/PDL-1	Glioma	51.0172	8	0	0	0	1	1	1	0	0	Altered
P-0015591	Male	62	PD-1/PDL-1	Head and Neck Cancer	0	14	1	0	0	0	0	0	0	0	Unaltered
P-0015593	Female	69	PD-1/PDL-1	Non-Small Cell Lung Cancer	4.32349	14	0	0	0	0	0	0	0	0	Unaltered
P-0015600	Female	50	PD-1/PDL-1	Non-Small Cell Lung Cancer	4.32349	13	1	0	0	0	0	0	0	0	Unaltered
P-0015603	Male	64	PD-1/PDL-1	Glioma	3.45879	14	0	0	0	0	0	0	0	0	Unaltered
P-0015612	Female	66	Combo	Melanoma	19.8881	15	0	0	0	0	1	0	0	0	Altered
P-0015615	Male	70	PD-1/PDL-1	Bladder Cancer	2.59409	21	0	0	0	0	0	0	0	0	Unaltered
P-0015644	Female	62	Combo	Bladder Cancer	3.45879	26	0	0	0	0	0	0	0	0	Unaltered
P-0015648	Male	67	PD-1/PDL-1	Non-Small Cell Lung Cancer	4.32349	20	0	0	0	0	0	0	0	0	Unaltered
P-0015649	Male	75	Combo	Bladder Cancer	44.0996	24	1	0	0	1	0	0	0	0	Altered
P-0015660	Male	71	Combo	Bladder Cancer	8.64698	28	1	0	0	0	0	0	0	0	Unaltered
P-0015661	Male	55	PD-1/PDL-1	Bladder Cancer	3.45879	10	0	0	0	0	0	0	0	0	Unaltered
P-0015663	Female	75	Combo	Bladder Cancer	4.32349	5	0	0	1	0	0	0	0	0	Altered
P-0015679	Male	47	Combo	Melanoma	5.18819	18	0	0	0	0	0	0	0	0	Unaltered
P-0015697	Female	69	PD-1/PDL-1	Melanoma	18.1587	14	0	0	0	1	0	0	0	0	Altered
P-0015713	Female	33	PD-1/PDL-1	Breast Cancer	0.864698	9	0	0	0	0	0	0	0	0	Unaltered
P-0015716	Male	76	PD-1/PDL-1	Bladder Cancer	6.05289	15	0	0	0	0	0	0	0	0	Unaltered
P-0015717	Male	56	Combo	Melanoma	1.7294	18	0	0	0	0	0	0	0	0	Unaltered
P-0015745	Male	72	PD-1/PDL-1	Head and Neck Cancer	5.18819	14	0	0	0	0	0	0	0	0	Unaltered
P-0015758	Female	89	PD-1/PDL-1	Non-Small Cell Lung Cancer	5.18819	13	0	0	1	0	0	0	0	0	Altered
P-0015780	Male	53	PD-1/PDL-1	Non-Small Cell Lung Cancer	6.05289	18	0	0	0	0	0	0	0	0	Unaltered
P-0015785	Female	57	PD-1/PDL-1	Non-Small Cell Lung Cancer	22.4822	9	1	0	0	0	1	0	0	0	Altered
P-0015791	Male	65	PD-1/PDL-1	Melanoma	6.91758	58	1	0	0	1	0	0	0	0	Altered
P-0015830	Male	83	PD-1/PDL-1	Melanoma	50.1525	14	0	0	0	1	1	0	0	0	Altered
P-0015851	Male	58	PD-1/PDL-1	Colorectal Cancer	30.2644	5	0	0	0	0	0	0	0	0	Unaltered
P-0015855	Male	54	PD-1/PDL-1	Melanoma	10.3764	16	0	0	1	0	0	0	0	0	Altered
P-0015904	Male	38	Combo	Esophagogastric Cancer	11.2411	6	0	0	0	0	0	0	0	0	Unaltered
P-0015905	Female	52	PD-1/PDL-1	Breast Cancer	4.32349	1	1	0	0	0	0	0	0	0	Unaltered
P-0015920	Male	80	PD-1/PDL-1	Bladder Cancer	41.5055	15	0	0	0	0	0	1	0	0	Altered
P-0015923	Male	82	PD-1/PDL-1	Bladder Cancer	31.1291	38	0	1	0	0	0	0	0	0	Altered
P-0015928	Male	78	Combo	Cancer of Unknown Primary	6.91758	16	0	0	0	0	0	0	0	0	Unaltered
P-0015937	Female	74	PD-1/PDL-1	Non-Small Cell Lung Cancer	10.3764	15	0	0	1	0	0	0	0	0	Altered
P-0015955	Female	75	PD-1/PDL-1	Non-Small Cell Lung Cancer	6.91758	14	1	0	0	1	0	0	0	0	Altered
P-0015965	Female	70	PD-1/PDL-1	Bladder Cancer	2.59409	6	1	0	0	0	0	0	0	0	Unaltered
P-0015966	Male	71	PD-1/PDL-1	Bladder Cancer	22.4822	15	0	0	0	0	0	1	0	0	Altered
P-0015967	Male	61	PD-1/PDL-1	Cancer of Unknown Primary	3.45879	2	0	0	0	0	0	0	0	0	Unaltered
P-0015977	Female	42	Combo	Melanoma	2.59409	17	0	0	0	0	0	0	0	0	Unaltered
P-0015983	Female	66	PD-1/PDL-1	Renal Cell Carcinoma	5.18819	23	0	0	0	0	1	0	0	0	Altered
P-0015984	Female	67	PD-1/PDL-1	Non-Small Cell Lung Cancer	24.2115	6	1	0	0	0	1	0	0	0	Altered
P-0015987	Female	71	PD-1/PDL-1	Non-Small Cell Lung Cancer	7.78228	10	1	0	0	0	0	0	0	0	Unaltered
P-0015989	Male	67	PD-1/PDL-1	Melanoma	2.59409	14	0	0	0	0	0	0	0	0	Unaltered
P-0016025	Female	77	PD-1/PDL-1	Head and Neck Cancer	23.3468	15	0	0	0	0	0	1	0	0	Altered
P-0016028	Female	62	PD-1/PDL-1	Cancer of Unknown Primary	2.59409	5	0	0	0	0	0	0	0	0	Unaltered
P-0016033	Male	73	PD-1/PDL-1	Non-Small Cell Lung Cancer	28.535	15	0	0	0	1	1	0	0	0	Altered
P-0016046	Female	69	PD-1/PDL-1	Non-Small Cell Lung Cancer	5.18819	16	0	1	0	0	0	0	0	0	Altered
P-0016048	Female	25	PD-1/PDL-1	Glioma	4.32349	12	1	0	0	0	0	0	0	0	Unaltered
P-0016062	Male	63	PD-1/PDL-1	Head and Neck Cancer	10.3764	14	0	0	1	0	0	0	0	0	Altered
P-0016063	Male	68	CTLA4	Cancer of Unknown Primary	3.45879	2	1	0	0	0	0	0	0	0	Unaltered
P-0016149	Male	65	Combo	Bladder Cancer	15.5646	7	0	0	0	0	0	0	0	0	Unaltered
P-0016174	Female	73	PD-1/PDL-1	Non-Small Cell Lung Cancer	12.9705	14	0	0	0	0	1	0	0	0	Altered
P-0016175	Female	77	PD-1/PDL-1	Non-Small Cell Lung Cancer	14.6999	1	1	0	0	0	1	0	0	0	Altered
P-0016177	Male	73	PD-1/PDL-1	Melanoma	4.32349	15	0	0	0	0	1	0	0	0	Altered
P-0016181	Female	77	PD-1/PDL-1	Colorectal Cancer	65.7171	67	0	1	0	0	0	1	0	0	Altered
P-0016185	Male	73	PD-1/PDL-1	Non-Small Cell Lung Cancer	6.05289	9	1	0	0	0	0	1	0	0	Altered
P-0016188	Male	72	PD-1/PDL-1	Cancer of Unknown Primary	25.0762	8	0	0	0	0	0	0	0	0	Unaltered
P-0016191	Male	78	PD-1/PDL-1	Head and Neck Cancer	7.78228	7	0	0	0	0	0	0	0	0	Unaltered
P-0016197	Male	83	PD-1/PDL-1	Melanoma	26.8056	3	1	0	0	0	1	0	0	0	Altered
P-0016210	Male	74	PD-1/PDL-1	Head and Neck Cancer	4.32349	14	0	0	0	0	0	0	0	0	Unaltered
P-0016226	Female	54	CTLA4	Breast Cancer	3.45879	22	1	0	0	0	0	0	0	0	Unaltered
P-0016233	Male	82	PD-1/PDL-1	Esophagogastric Cancer	4.32349	3	1	0	0	0	0	0	0	0	Unaltered
P-0016237	Male	70	PD-1/PDL-1	Cancer of Unknown Primary	1.7294	3	1	1	0	0	0	0	0	0	Altered
P-0016238	Male	57	PD-1/PDL-1	Glioma	1.7294	23	0	0	0	0	0	0	0	0	Unaltered
P-0016240	Female	55	PD-1/PDL-1	Head and Neck Cancer	2.59409	10	0	0	0	0	0	0	0	0	Unaltered
P-0016241	Female	59	PD-1/PDL-1	Cancer of Unknown Primary	8.64698	15	0	0	0	0	0	0	0	0	Unaltered
P-0016243	Male	45	PD-1/PDL-1	Head and Neck Cancer	0	3	1	0	0	0	0	0	0	0	Unaltered
P-0016256	Male	55	PD-1/PDL-1	Glioma	3.45879	5	1	0	0	0	0	0	0	0	Unaltered
P-0016258	Female	53	PD-1/PDL-1	Cancer of Unknown Primary	10.3764	1	1	1	0	0	0	0	0	0	Altered
P-0016276	Female	86	PD-1/PDL-1	Melanoma	6.91758	12	0	0	0	0	0	0	0	0	Unaltered
P-0016284	Male	80	PD-1/PDL-1	Non-Small Cell Lung Cancer	0.864698	20	0	0	0	0	0	0	0	0	Unaltered
P-0016287	Male	90	PD-1/PDL-1	Melanoma	5.18819	11	1	0	0	0	0	0	0	0	Unaltered
P-0016289	Male	59	PD-1/PDL-1	Cancer of Unknown Primary	3.45879	8	1	0	0	0	0	0	0	0	Unaltered
P-0016290	Female	83	PD-1/PDL-1	Non-Small Cell Lung Cancer	8.64698	2	1	0	0	0	0	0	0	0	Unaltered
P-0016308	Female	71	PD-1/PDL-1	Non-Small Cell Lung Cancer	14.6999	14	1	0	0	0	0	0	0	0	Unaltered
P-0016311	Male	56	PD-1/PDL-1	Esophagogastric Cancer	3.45879	23	0	0	0	0	0	0	0	0	Unaltered
P-0016314	Female	63	PD-1/PDL-1	Colorectal Cancer	109.817	3	1	1	1	1	0	0	0	0	Altered
P-0016316	Female	68	PD-1/PDL-1	Bladder Cancer	3.45879	22	0	0	0	0	0	0	0	0	Unaltered
P-0016340	Female	35	PD-1/PDL-1	Cancer of Unknown Primary	1.7294	1	1	0	0	0	0	0	0	0	Unaltered
P-0016402	Male	42	PD-1/PDL-1	Bladder Cancer	1.7294	3	1	0	0	0	0	0	0	0	Unaltered
P-0016481	Male	62	PD-1/PDL-1	Non-Small Cell Lung Cancer	19.8881	6	1	1	0	0	0	0	0	0	Altered
P-0016506	Female	46	PD-1/PDL-1	Melanoma	3.45879	14	0	0	0	0	0	0	0	0	Unaltered
P-0016522	Male	59	PD-1/PDL-1	Colorectal Cancer	43.2349	8	0	1	0	0	0	0	0	1	Altered
P-0016531	Male	67	Combo	Melanoma	3.45879	14	0	0	0	0	0	0	0	0	Unaltered
P-0016542	Male	80	PD-1/PDL-1	Non-Small Cell Lung Cancer	19.0234	1	1	0	0	0	1	0	0	0	Altered
P-0016546	Male	73	PD-1/PDL-1	Bladder Cancer	21.6175	11	1	1	0	0	0	1	0	0	Altered
P-0016558	Female	57	PD-1/PDL-1	Cancer of Unknown Primary	1.7294	10	1	0	0	0	0	0	0	0	Unaltered
P-0016562	Male	45	PD-1/PDL-1	Head and Neck Cancer	7.78228	16	0	1	0	0	0	0	0	0	Altered
P-0016614	Female	60	PD-1/PDL-1	Non-Small Cell Lung Cancer	7.78228	4	1	0	0	0	0	1	0	0	Altered
P-0016618	Female	81	PD-1/PDL-1	Bladder Cancer	0.864698	10	0	0	0	0	0	0	0	0	Unaltered
P-0016624	Male	66	PD-1/PDL-1	Bladder Cancer	8.64698	14	0	0	0	0	0	0	0	0	Unaltered
P-0016634	Female	54	PD-1/PDL-1	Cancer of Unknown Primary	8.64698	10	1	0	0	0	0	1	0	0	Altered
P-0016646	Male	77	PD-1/PDL-1	Non-Small Cell Lung Cancer	9.51168	4	1	0	0	0	1	0	0	0	Altered
P-0016648	Male	87	PD-1/PDL-1	Melanoma	1.7294	14	0	0	0	0	0	0	0	0	Unaltered
P-0016691	Male	54	PD-1/PDL-1	Glioma	0.864698	13	0	0	0	0	0	0	0	0	Unaltered
P-0016697	Female	68	PD-1/PDL-1	Melanoma	0.864698	14	0	0	0	0	0	0	0	0	Unaltered
P-0016720	Male	69	PD-1/PDL-1	Bladder Cancer	5.18819	14	0	0	0	0	0	0	0	0	Unaltered
P-0016724	Male	53	PD-1/PDL-1	Cancer of Unknown Primary	2.59409	1	1	1	0	0	0	0	0	1	Altered
P-0016767	Female	53	PD-1/PDL-1	Colorectal Cancer	12.1058	10	0	1	0	0	0	0	0	0	Altered
P-0016775	Female	33	Combo	Cancer of Unknown Primary	1.7294	5	0	0	0	0	0	0	0	0	Unaltered
P-0016782	Female	61	PD-1/PDL-1	Non-Small Cell Lung Cancer	21.6175	3	0	0	0	0	0	1	0	0	Altered
P-0016809	Female	89	PD-1/PDL-1	Cancer of Unknown Primary	3.45879	13	0	0	0	0	0	0	0	0	Unaltered
P-0016835	Female	68	PD-1/PDL-1	Head and Neck Cancer	6.05289	5	0	0	0	0	0	0	0	0	Unaltered
P-0016855	Male	68	PD-1/PDL-1	Bladder Cancer	6.91758	12	0	0	0	0	0	0	0	0	Unaltered
P-0016875	Female	89	PD-1/PDL-1	Non-Small Cell Lung Cancer	5.18819	1	0	0	0	0	0	0	0	0	Unaltered
P-0016910	Female	70	PD-1/PDL-1	Non-Small Cell Lung Cancer	2.59409	13	0	0	0	0	0	0	0	0	Unaltered
P-0016915	Male	79	PD-1/PDL-1	Bladder Cancer	8.64698	7	0	1	0	0	0	0	0	0	Altered
P-0016918	Male	62	PD-1/PDL-1	Cancer of Unknown Primary	12.1058	21	0	0	0	0	0	0	0	0	Unaltered
P-0016925	Male	71	PD-1/PDL-1	Bladder Cancer	23.3468	4	1	1	0	0	0	0	0	0	Altered
P-0016931	Male	61	Combo	Esophagogastric Cancer	6.05289	1	0	0	0	0	0	0	0	0	Unaltered
P-0017044	Male	53	PD-1/PDL-1	Bladder Cancer	5.18819	13	0	0	0	0	0	0	0	0	Unaltered
P-0017159	Female	36	PD-1/PDL-1	Cancer of Unknown Primary	33.7232	4	0	1	1	0	0	1	0	0	Altered
P-0017208	Male	66	PD-1/PDL-1	Bladder Cancer	16.4293	3	1	0	0	0	0	1	0	0	Altered
P-0017241	Male	71	PD-1/PDL-1	Bladder Cancer	4.32349	4	1	1	0	0	0	0	0	0	Altered
P-0017263	Male	74	PD-1/PDL-1	Colorectal Cancer	3.45879	2	0	0	0	0	0	0	0	0	Unaltered
P-0017276	Male	60	PD-1/PDL-1	Bladder Cancer	5.18819	18	1	0	0	0	0	0	0	0	Unaltered
P-0017285	Female	17	PD-1/PDL-1	Cancer of Unknown Primary	0.864698	7	0	0	0	0	0	0	0	0	Unaltered
P-0017313	Male	79	PD-1/PDL-1	Bladder Cancer	3.45879	19	1	0	0	0	0	0	0	0	Unaltered
P-0017370	Male	64	PD-1/PDL-1	Esophagogastric Cancer	37.182	6	0	1	0	0	0	1	1	0	Altered
P-0017414	Male	52	PD-1/PDL-1	Head and Neck Cancer	0	12	0	0	0	0	0	0	0	0	Unaltered
P-0017472	Male	80	PD-1/PDL-1	Bladder Cancer	20.7528	6	0	0	0	0	0	0	0	0	Unaltered
P-0017508	Female	68	PD-1/PDL-1	Head and Neck Cancer	4.32349	2	1	0	0	0	0	0	0	0	Unaltered
P-0017599	Male	72	PD-1/PDL-1	Bladder Cancer	5.87232	7	1	0	0	0	0	0	0	0	Unaltered
P-0017602	Female	43	Combo	Cancer of Unknown Primary	2.93616	1	1	0	0	0	0	0	0	0	Unaltered
P-0017658	Male	76	PD-1/PDL-1	Bladder Cancer	9.7872	3	0	0	0	0	0	0	0	0	Unaltered
P-0017678	Male	47	PD-1/PDL-1	Head and Neck Cancer	9.51168	14	0	0	0	0	0	0	0	0	Unaltered
P-0017687	Female	76	PD-1/PDL-1	Head and Neck Cancer	7.78228	11	0	0	0	0	0	0	0	0	Unaltered
P-0017697	Female	60	PD-1/PDL-1	Colorectal Cancer	89.9286	8	1	1	1	0	0	1	0	1	Altered
P-0017712	Male	70	PD-1/PDL-1	Bladder Cancer	7.78228	2	1	0	0	0	0	0	0	0	Unaltered
P-0017717	Male	66	PD-1/PDL-1	Head and Neck Cancer	4.32349	12	0	0	0	0	0	0	0	0	Unaltered
P-0017755	Female	68	PD-1/PDL-1	Cancer of Unknown Primary	2.59409	3	0	0	0	0	0	0	0	0	Unaltered
P-0017766	Male	66	Combo	Colorectal Cancer	7.78228	6	0	0	0	0	0	0	0	0	Unaltered
P-0017769	Male	39	PD-1/PDL-1	Head and Neck Cancer	6.05289	9	1	0	0	0	0	0	0	0	Unaltered
P-0017986	Female	33	PD-1/PDL-1	Colorectal Cancer	60.5289	2	0	0	0	0	0	0	0	0	Unaltered
P-0018028	Male	72	PD-1/PDL-1	Bladder Cancer	7.78228	3	1	0	0	0	0	0	0	0	Unaltered
P-0018185	Female	49	PD-1/PDL-1	Head and Neck Cancer	4.32349	14	0	0	0	0	0	0	0	0	Unaltered
P-0018188	Female	61	PD-1/PDL-1	Head and Neck Cancer	7.78228	4	1	0	0	0	0	0	0	0	Unaltered
P-0018216	Male	62	PD-1/PDL-1	Bladder Cancer	8.64698	1	0	0	0	0	0	0	0	0	Unaltered
P-0018229	Female	71	PD-1/PDL-1	Bladder Cancer	4.32349	5	0	0	0	0	0	0	0	0	Unaltered
P-0018277	Male	27	Combo	Colorectal Cancer	8.64698	1	0	0	0	0	0	0	0	0	Unaltered
P-0018340	Male	71	PD-1/PDL-1	Esophagogastric Cancer	4.32349	12	0	0	0	0	0	0	0	0	Unaltered
P-0018341	Female	54	PD-1/PDL-1	Cancer of Unknown Primary	3.45879	2	0	0	0	0	0	1	0	0	Altered
P-0018371	Male	73	PD-1/PDL-1	Esophagogastric Cancer	4.32349	13	0	0	0	0	0	0	0	0	Unaltered
P-0018457	Male	51	PD-1/PDL-1	Cancer of Unknown Primary	2.59409	2	1	0	0	0	0	0	0	0	Unaltered
P-0018464	Male	26	PD-1/PDL-1	Esophagogastric Cancer	6.05289	22	0	0	0	0	0	0	0	0	Unaltered
P-0018541	Male	79	PD-1/PDL-1	Bladder Cancer	7.78228	3	0	0	0	0	0	0	0	0	Unaltered
P-0018563	Female	64	PD-1/PDL-1	Cancer of Unknown Primary	16.4293	6	1	0	0	0	0	1	0	0	Altered
P-0018568	Female	65	PD-1/PDL-1	Esophagogastric Cancer	5.18819	12	0	0	0	0	0	0	0	0	Unaltered
P-0018580	Female	41	PD-1/PDL-1	Colorectal Cancer	4.32349	5	1	0	0	0	0	0	0	0	Unaltered
P-0018601	Male	56	PD-1/PDL-1	Cancer of Unknown Primary	6.05289	1	1	0	0	0	0	0	0	0	Unaltered
P-0018665	Male	43	Combo	Cancer of Unknown Primary	7.78228	1	0	0	0	0	0	0	0	0	Unaltered
P-0018671	Male	76	PD-1/PDL-1	Cancer of Unknown Primary	1.7294	15	0	0	0	0	0	0	0	0	Unaltered
P-0018673	Female	78	PD-1/PDL-1	Cancer of Unknown Primary	28.535	14	0	0	0	0	0	0	0	0	Unaltered
P-0018683	Female	63	PD-1/PDL-1	Esophagogastric Cancer	6.05289	9	0	0	0	0	0	0	0	1	Altered
P-0018771	Male	71	PD-1/PDL-1	Esophagogastric Cancer	8.64698	13	0	0	0	0	0	0	0	0	Unaltered
P-0018782	Male	62	Combo	Esophagogastric Cancer	1.7294	10	0	0	0	0	0	0	0	0	Unaltered
P-0018800	Male	49	Combo	Esophagogastric Cancer	8.64698	3	0	0	0	0	0	0	0	0	Unaltered
P-0018925	Male	69	PD-1/PDL-1	Head and Neck Cancer	17.294	2	1	0	0	0	0	1	0	0	Altered
P-0018927	Female	68	Combo	Esophagogastric Cancer	6.91758	13	0	0	0	0	0	0	0	0	Unaltered
P-0018931	Female	66	Combo	Cancer of Unknown Primary	4.32349	1	0	0	0	0	0	0	0	0	Unaltered
P-0018960	Female	60	PD-1/PDL-1	Cancer of Unknown Primary	10.3764	2	1	0	0	0	0	1	0	0	Altered
P-0018986	Female	73	PD-1/PDL-1	Esophagogastric Cancer	10.3764	12	0	1	1	0	0	0	0	0	Altered
P-0019003	Male	81	PD-1/PDL-1	Cancer of Unknown Primary	4.32349	1	0	0	0	0	0	0	0	0	Unaltered
P-0019012	Male	80	PD-1/PDL-1	Cancer of Unknown Primary	1.7294	11	1	0	0	0	0	0	0	0	Unaltered
P-0019027	Female	40	PD-1/PDL-1	Cancer of Unknown Primary	4.32349	5	1	0	0	0	0	0	0	0	Unaltered
P-0019034	Female	61	PD-1/PDL-1	Cancer of Unknown Primary	0	10	0	0	0	0	0	0	0	0	Unaltered
P-0019036	Male	58	PD-1/PDL-1	Bladder Cancer	5.18819	6	0	0	0	0	0	1	0	0	Altered
P-0019101	Female	52	PD-1/PDL-1	Bladder Cancer	15.5646	4	0	0	0	0	0	1	0	0	Altered
P-0019226	Male	29	PD-1/PDL-1	Head and Neck Cancer	3.45879	9	0	0	0	0	0	0	0	0	Unaltered
P-0019240	Male	59	PD-1/PDL-1	Head and Neck Cancer	0.864698	3	1	0	0	0	0	0	0	0	Unaltered
P-0019258	Male	62	PD-1/PDL-1	Head and Neck Cancer	6.91758	3	1	0	0	0	0	0	0	0	Unaltered
P-0019267	Female	50	PD-1/PDL-1	Colorectal Cancer	5.18819	7	0	0	0	0	0	0	0	1	Altered
P-0019271	Male	32	Combo	Esophagogastric Cancer	6.91758	9	0	0	0	0	0	0	0	0	Unaltered
P-0019272	Female	47	PD-1/PDL-1	Esophagogastric Cancer	7.78228	12	0	0	0	0	0	1	0	0	Altered
P-0019297	Female	44	PD-1/PDL-1	Head and Neck Cancer	4.32349	11	0	0	0	0	0	0	0	0	Unaltered
P-0019316	Male	52	PD-1/PDL-1	Head and Neck Cancer	8.64698	10	1	0	0	0	0	0	0	0	Unaltered
P-0019351	Male	62	PD-1/PDL-1	Esophagogastric Cancer	5.18819	10	0	0	0	0	0	0	0	0	Unaltered
P-0019407	Male	77	PD-1/PDL-1	Head and Neck Cancer	12.1058	5	1	0	0	0	0	0	0	0	Unaltered
P-0019413	Male	62	PD-1/PDL-1	Esophagogastric Cancer	6.91758	2	0	1	0	0	0	0	0	0	Altered
P-0019417	Male	75	PD-1/PDL-1	Bladder Cancer	15.5646	14	1	1	0	0	0	0	0	0	Altered
P-0019428	Female	70	PD-1/PDL-1	Colorectal Cancer	44.0996	5	0	1	0	0	0	0	0	0	Altered
P-0019475	Male	47	PD-1/PDL-1	Colorectal Cancer	91.658	1	1	1	0	0	0	1	0	0	Altered
P-0019540	Male	46	PD-1/PDL-1	Head and Neck Cancer	6.05289	2	1	0	0	0	0	0	0	0	Unaltered
P-0019648	Male	67	PD-1/PDL-1	Cancer of Unknown Primary	0.864698	9	0	0	0	0	0	0	0	0	Unaltered
P-0019657	Male	70	PD-1/PDL-1	Esophagogastric Cancer	5.18819	3	1	0	0	0	0	0	0	0	Unaltered
P-0019691	Male	48	PD-1/PDL-1	Esophagogastric Cancer	26.8056	8	0	1	0	0	1	0	1	0	Altered
P-0019710	Male	56	PD-1/PDL-1	Colorectal Cancer	6.05289	7	1	0	0	0	1	0	0	0	Altered
P-0019717	Male	63	PD-1/PDL-1	Bladder Cancer	13.8352	12	0	1	0	0	0	0	0	0	Altered
P-0019754	Male	60	PD-1/PDL-1	Esophagogastric Cancer	5.18819	10	0	0	0	0	0	0	0	0	Unaltered
P-0019771	Female	55	PD-1/PDL-1	Bladder Cancer	6.05289	7	0	0	0	0	0	0	0	0	Unaltered
P-0019916	Female	44	Combo	Esophagogastric Cancer	3.45879	2	0	0	0	0	0	0	0	0	Unaltered
P-0019949	Male	28	PD-1/PDL-1	Colorectal Cancer	37.182	8	0	1	0	0	0	1	0	0	Altered
P-0020040	Male	62	PD-1/PDL-1	Head and Neck Cancer	3.45879	10	1	0	0	0	0	0	0	0	Unaltered
P-0020047	Female	76	PD-1/PDL-1	Bladder Cancer	8.64698	12	0	0	0	0	0	0	0	0	Unaltered
P-0020065	Male	73	PD-1/PDL-1	Bladder Cancer	16.4293	10	0	0	0	1	0	0	0	0	Altered
P-0020086	Female	80	PD-1/PDL-1	Bladder Cancer	16.4293	10	0	1	0	1	0	0	0	0	Altered
P-0020109	Male	66	PD-1/PDL-1	Esophagogastric Cancer	6.05289	3	1	0	0	0	0	0	0	0	Unaltered
P-0020113	Male	51	PD-1/PDL-1	Head and Neck Cancer	2.59409	9	1	0	0	0	0	0	0	0	Unaltered
P-0020121	Female	79	PD-1/PDL-1	Bladder Cancer	15.5646	8	0	1	0	1	0	0	0	0	Altered
P-0020122	Female	64	PD-1/PDL-1	Bladder Cancer	21.6175	9	0	0	0	0	0	0	0	0	Unaltered
P-0020140	Male	73	PD-1/PDL-1	Cancer of Unknown Primary	9.51168	5	1	0	0	0	0	1	0	0	Altered
P-0020146	Female	67	PD-1/PDL-1	Head and Neck Cancer	10.3764	2	1	0	0	0	0	0	0	0	Unaltered
P-0020147	Male	69	PD-1/PDL-1	Head and Neck Cancer	5.18819	9	0	0	0	0	0	0	0	0	Unaltered
P-0020156	Female	67	PD-1/PDL-1	Head and Neck Cancer	17.294	8	0	0	0	1	0	0	0	0	Altered
P-0020167	Male	71	PD-1/PDL-1	Bladder Cancer	4.32349	2	1	0	0	0	1	0	0	0	Altered
P-0020169	Male	59	PD-1/PDL-1	Esophagogastric Cancer	6.05289	4	1	0	0	0	0	1	0	0	Altered
P-0020175	Male	70	PD-1/PDL-1	Esophagogastric Cancer	4.32349	8	0	1	0	0	0	0	0	0	Altered
P-0020226	Male	48	PD-1/PDL-1	Esophagogastric Cancer	0.864698	9	0	0	0	0	0	0	0	0	Unaltered
P-0020252	Female	66	PD-1/PDL-1	Colorectal Cancer	63.123	9	0	1	1	1	0	0	0	0	Altered
P-0020399	Male	62	PD-1/PDL-1	Colorectal Cancer	60.5289	15	0	0	0	0	0	1	0	0	Altered
P-0020422	Female	67	PD-1/PDL-1	Cancer of Unknown Primary	26.8056	3	1	0	1	0	0	0	0	0	Altered
P-0020489	Male	65	PD-1/PDL-1	Cancer of Unknown Primary	8.64698	9	1	0	0	0	0	0	0	0	Unaltered
P-0020542	Male	73	PD-1/PDL-1	Bladder Cancer	4.32349	12	0	0	0	0	0	0	0	0	Unaltered
P-0020591	Male	74	PD-1/PDL-1	Cancer of Unknown Primary	19.8881	3	0	0	0	0	0	0	0	0	Unaltered
P-0020592	Male	75	PD-1/PDL-1	Bladder Cancer	6.05289	9	0	0	1	0	0	0	0	0	Altered
P-0020594	Female	69	PD-1/PDL-1	Cancer of Unknown Primary	5.18819	4	1	0	0	0	0	0	0	0	Unaltered
P-0020649	Male	63	PD-1/PDL-1	Head and Neck Cancer	1.7294	8	0	1	0	0	0	0	0	0	Altered
P-0020714	Female	62	PD-1/PDL-1	Cancer of Unknown Primary	2.59409	1	1	0	0	0	0	0	0	0	Unaltered
P-0020770	Male	66	Combo	Cancer of Unknown Primary	5.18819	4	0	0	0	0	0	0	0	0	Unaltered
P-0020835	Male	65	PD-1/PDL-1	Bladder Cancer	6.91758	8	0	0	0	1	0	0	0	0	Altered
P-0020846	Male	62	PD-1/PDL-1	Head and Neck Cancer	4.32349	3	1	0	0	0	0	0	0	0	Unaltered
P-0020878	Male	46	PD-1/PDL-1	Colorectal Cancer	2.59409	18	0	0	0	0	0	0	0	0	Unaltered
P-0020903	Male	56	PD-1/PDL-1	Esophagogastric Cancer	6.05289	8	0	0	0	0	0	0	0	0	Unaltered
P-0020965	Male	60	PD-1/PDL-1	Head and Neck Cancer	4.32349	4	1	0	0	0	0	0	0	0	Unaltered
P-0020986	Female	76	PD-1/PDL-1	Cancer of Unknown Primary	13.8352	14	0	0	1	0	0	0	0	0	Altered
P-0020995	Male	63	Combo	Bladder Cancer	5.18819	5	1	0	0	0	0	0	0	0	Unaltered
P-0021004	Male	81	PD-1/PDL-1	Bladder Cancer	5.18819	5	0	0	0	0	0	0	0	0	Unaltered
P-0021255	Male	65	PD-1/PDL-1	Bladder Cancer	14.6999	5	0	1	0	0	0	0	0	0	Altered
P-0021266	Female	54	PD-1/PDL-1	Cancer of Unknown Primary	22.4822	6	0	0	0	0	1	0	0	0	Altered
P-0021304	Male	50	PD-1/PDL-1	Colorectal Cancer	83.8757	6	0	1	1	1	0	1	0	0	Altered
P-0021403	Male	72	Combo	Esophagogastric Cancer	6.05289	1	0	0	0	0	0	0	0	0	Unaltered
P-0021454	Female	71	PD-1/PDL-1	Cancer of Unknown Primary	7.78228	7	0	0	0	0	0	0	0	0	Unaltered
P-0021471	Female	66	PD-1/PDL-1	Bladder Cancer	6.05289	6	0	0	0	0	0	0	0	0	Unaltered
P-0021474	Male	68	PD-1/PDL-1	Head and Neck Cancer	2.59409	51	0	0	0	0	0	0	1	0	Altered
P-0021484	Male	65	PD-1/PDL-1	Bladder Cancer	12.1058	9	0	1	0	0	0	0	0	0	Altered
P-0021503	Male	73	PD-1/PDL-1	Bladder Cancer	20.7528	7	1	1	1	0	0	0	0	0	Altered
P-0021507	Male	64	PD-1/PDL-1	Cancer of Unknown Primary	8.64698	1	1	0	0	0	0	0	0	0	Unaltered
P-0021528	Male	86	PD-1/PDL-1	Bladder Cancer	13.8352	11	0	0	0	0	0	1	0	0	Altered
P-0021532	Female	79	PD-1/PDL-1	Bladder Cancer	12.9705	7	0	0	0	0	0	0	0	0	Unaltered
P-0021621	Female	53	PD-1/PDL-1	Head and Neck Cancer	3.45879	19	0	0	0	0	0	0	0	0	Unaltered
P-0021622	Male	74	PD-1/PDL-1	Bladder Cancer	7.78228	8	0	0	0	0	0	0	0	0	Unaltered
P-0021644	Male	84	PD-1/PDL-1	Bladder Cancer	0	9	0	0	0	0	0	0	0	0	Unaltered
P-0021651	Male	76	Combo	Cancer of Unknown Primary	10.3764	2	0	0	0	0	0	0	0	0	Unaltered
P-0021756	Male	53	PD-1/PDL-1	Cancer of Unknown Primary	1.7294	5	0	0	0	0	0	0	0	0	Unaltered
P-0021774	Male	59	PD-1/PDL-1	Cancer of Unknown Primary	88.1992	6	0	1	0	0	1	0	0	0	Altered
P-0021834	Male	64	PD-1/PDL-1	Colorectal Cancer	6.05289	27	0	0	0	0	0	0	0	0	Unaltered
P-0021841	Female	50	PD-1/PDL-1	Cancer of Unknown Primary	5.18819	6	0	0	0	0	0	0	0	0	Unaltered
P-0021848	Male	60	PD-1/PDL-1	Bladder Cancer	4.32349	4	1	0	0	0	0	0	0	0	Unaltered
P-0021911	Female	70	PD-1/PDL-1	Cancer of Unknown Primary	6.91758	4	1	1	0	1	0	0	0	0	Altered
P-0021915	Male	65	PD-1/PDL-1	Head and Neck Cancer	6.91758	7	1	0	0	0	0	1	0	0	Altered
P-0021993	Female	64	PD-1/PDL-1	Esophagogastric Cancer	4.32349	5	0	0	0	0	0	0	0	0	Unaltered
P-0022001	Female	67	PD-1/PDL-1	Cancer of Unknown Primary	2.59409	2	0	0	0	0	0	0	0	0	Unaltered
P-0022034	Male	51	PD-1/PDL-1	Bladder Cancer	0.864698	2	1	0	0	0	0	0	0	0	Unaltered
P-0022068	Female	83	PD-1/PDL-1	Bladder Cancer	6.91758	3	0	0	0	0	0	0	0	0	Unaltered
P-0022154	Male	76	PD-1/PDL-1	Esophagogastric Cancer	2.59409	7	0	0	0	0	0	0	0	0	Unaltered
P-0022441	Female	70	PD-1/PDL-1	Head and Neck Cancer	11.2411	3	0	0	0	0	0	0	0	0	Unaltered
P-0022502	Male	62	PD-1/PDL-1	Head and Neck Cancer	12.1058	6	0	0	0	0	0	0	0	0	Unaltered
P-0022510	Male	71	PD-1/PDL-1	Esophagogastric Cancer	5.18819	6	1	0	0	0	0	0	0	0	Unaltered
P-0022520	Male	48	PD-1/PDL-1	Bladder Cancer	68.3111	6	0	1	1	0	0	0	0	0	Altered
P-0022543	Male	22	PD-1/PDL-1	Cancer of Unknown Primary	4.32349	3	0	0	0	0	0	0	0	0	Unaltered
P-0022688	Male	59	PD-1/PDL-1	Esophagogastric Cancer	3.45879	6	0	0	0	0	0	0	0	0	Unaltered
P-0022703	Male	75	PD-1/PDL-1	Cancer of Unknown Primary	6.05289	6	0	0	0	0	0	0	0	0	Unaltered
P-0022788	Male	54	Combo	Esophagogastric Cancer	8.64698	4	0	0	0	0	0	0	0	0	Unaltered
P-0022847	Male	68	PD-1/PDL-1	Esophagogastric Cancer	5.18819	5	1	0	0	0	0	0	0	0	Unaltered
P-0022952	Male	55	PD-1/PDL-1	Esophagogastric Cancer	6.91758	9	0	0	0	0	0	0	0	0	Unaltered
P-0022977	Female	48	PD-1/PDL-1	Colorectal Cancer	2.59409	5	0	0	0	0	0	0	0	0	Unaltered
P-0022995	Male	62	PD-1/PDL-1	Esophagogastric Cancer	5.18819	7	1	0	0	0	0	0	0	0	Unaltered
P-0023015	Male	75	PD-1/PDL-1	Head and Neck Cancer	6.91758	3	0	1	0	0	0	0	0	0	Altered
P-0023086	Male	56	PD-1/PDL-1	Cancer of Unknown Primary	4.32349	1	0	0	0	0	0	0	0	0	Unaltered
P-0023128	Male	44	PD-1/PDL-1	Colorectal Cancer	12.1058	11	0	0	0	0	0	0	0	0	Unaltered
P-0023138	Male	76	PD-1/PDL-1	Bladder Cancer	10.3764	8	1	0	0	0	0	0	0	0	Unaltered
P-0023194	Male	59	PD-1/PDL-1	Esophagogastric Cancer	2.59409	5	0	0	0	0	0	0	0	0	Unaltered
P-0023425	Male	58	PD-1/PDL-1	Bladder Cancer	11.2411	6	1	1	0	0	1	0	0	0	Altered
P-0023450	Male	83	PD-1/PDL-1	Bladder Cancer	16.4293	2	0	1	0	0	0	0	0	0	Altered
P-0023553	Male	56	PD-1/PDL-1	Esophagogastric Cancer	9.51168	10	0	0	1	0	0	0	0	0	Altered
P-0023557	Male	58	PD-1/PDL-1	Head and Neck Cancer	5.18819	5	0	0	0	0	0	0	0	0	Unaltered
P-0023603	Male	62	PD-1/PDL-1	Esophagogastric Cancer	7.78228	3	1	0	0	0	0	0	0	0	Unaltered
P-0023627	Male	54	PD-1/PDL-1	Esophagogastric Cancer	0	8	0	0	0	0	0	0	0	0	Unaltered
P-0023731	Female	56	PD-1/PDL-1	Colorectal Cancer	6.05289	2	0	0	0	0	0	0	0	0	Unaltered
P-0023749	Male	55	PD-1/PDL-1	Head and Neck Cancer	6.91758	2	0	0	0	0	0	0	0	0	Unaltered
P-0023785	Male	59	PD-1/PDL-1	Cancer of Unknown Primary	16.4293	4	0	0	0	0	0	0	0	0	Unaltered
P-0023790	Female	35	PD-1/PDL-1	Cancer of Unknown Primary	4.32349	4	0	0	0	0	0	0	0	0	Unaltered
P-0023896	Male	71	PD-1/PDL-1	Head and Neck Cancer	3.45879	14	0	0	0	0	0	0	0	0	Unaltered
P-0023948	Male	75	PD-1/PDL-1	Head and Neck Cancer	14.6999	4	0	1	0	0	0	0	0	0	Altered
P-0023963	Female	82	PD-1/PDL-1	Esophagogastric Cancer	24.2115	2	0	0	0	0	0	0	0	0	Unaltered
P-0023966	Male	83	Combo	Cancer of Unknown Primary	20.7528	3	0	0	0	0	0	1	0	0	Altered
P-0024054	Male	67	PD-1/PDL-1	Esophagogastric Cancer	8.64698	4	0	0	0	0	0	0	0	0	Unaltered
P-0024068	Female	70	PD-1/PDL-1	Esophagogastric Cancer	31.9938	1	0	0	0	0	0	0	0	0	Unaltered
P-0024084	Male	74	PD-1/PDL-1	Cancer of Unknown Primary	0.864698	3	0	0	0	0	0	0	0	0	Unaltered
P-0024205	Male	60	PD-1/PDL-1	Esophagogastric Cancer	6.91758	3	0	0	0	0	0	0	0	0	Unaltered
P-0024243	Female	56	PD-1/PDL-1	Esophagogastric Cancer	42.3702	2	0	1	1	0	0	0	0	0	Altered
P-0024263	Male	70	PD-1/PDL-1	Bladder Cancer	6.05289	3	0	1	0	0	0	0	0	0	Altered
P-0024270	Male	50	Combo	Esophagogastric Cancer	4.32349	2	0	0	0	0	0	0	0	0	Unaltered
P-0024386	Male	51	PD-1/PDL-1	Head and Neck Cancer	6.91758	2	0	0	0	0	0	0	0	0	Unaltered
P-0024419	Male	60	PD-1/PDL-1	Esophagogastric Cancer	0	4	0	0	0	0	0	0	0	0	Unaltered
P-0024527	Male	57	Combo	Esophagogastric Cancer	2.59409	7	0	0	0	0	0	0	0	0	Unaltered
P-0024530	Male	64	PD-1/PDL-1	Esophagogastric Cancer	6.05289	4	0	0	0	0	0	0	0	0	Unaltered
P-0024544	Female	79	PD-1/PDL-1	Bladder Cancer	34.5879	16	0	1	1	0	0	0	0	1	Altered
P-0024576	Male	62	PD-1/PDL-1	Head and Neck Cancer	8.64698	3	0	0	0	0	0	0	0	0	Unaltered
P-0024731	Male	78	PD-1/PDL-1	Skin Cancer, Non-Melanoma	63.9877	2	0	1	0	0	0	0	0	0	Altered
P-0024753	Female	21	PD-1/PDL-1	Cancer of Unknown Primary	0.864698	3	0	0	0	0	0	0	0	0	Unaltered
P-0024795	Female	72	PD-1/PDL-1	Bladder Cancer	11.2411	3	0	0	0	0	0	0	0	0	Unaltered
P-0024824	Male	55	PD-1/PDL-1	Colorectal Cancer	10.3764	3	0	0	0	0	0	1	0	0	Altered
P-0024827	Male	74	PD-1/PDL-1	Bladder Cancer	6.91758	1	0	1	0	0	0	0	0	0	Altered
P-0024866	Male	68	PD-1/PDL-1	Head and Neck Cancer	57.9348	3	0	0	0	0	1	0	0	0	Altered
P-0025079	Male	82	PD-1/PDL-1	Bladder Cancer	2.59409	6	0	0	0	0	0	0	0	0	Unaltered
P-0025115	Male	59	PD-1/PDL-1	Cancer of Unknown Primary	12.9705	2	0	0	1	0	0	0	0	0	Altered
P-0025120	Female	59	PD-1/PDL-1	Bladder Cancer	3.45879	4	0	1	0	0	0	0	0	0	Altered
P-0025146	Male	73	PD-1/PDL-1	Esophagogastric Cancer	0.864698	5	0	0	0	0	0	0	0	0	Unaltered
P-0025174	Female	64	PD-1/PDL-1	Bladder Cancer	3.45879	6	0	0	0	0	0	0	0	0	Unaltered
P-0025224	Male	48	PD-1/PDL-1	Esophagogastric Cancer	12.9705	4	0	0	0	0	0	0	0	0	Unaltered
P-0025313	Female	83	PD-1/PDL-1	Bladder Cancer	4.32349	8	0	0	0	0	0	0	0	0	Unaltered
P-0025373	Male	61	PD-1/PDL-1	Head and Neck Cancer	11.2411	1	0	0	0	0	0	0	0	0	Unaltered
P-0025394	Male	73	Combo	Esophagogastric Cancer	6.91758	2	0	0	0	0	0	0	0	0	Unaltered
P-0025471	Male	43	PD-1/PDL-1	Esophagogastric Cancer	3.45879	2	0	0	0	0	0	0	0	0	Unaltered
P-0025532	Female	68	PD-1/PDL-1	Colorectal Cancer	40.6408	3	0	0	1	0	0	1	0	0	Altered
P-0025544	Male	52	PD-1/PDL-1	Head and Neck Cancer	7.78228	3	0	0	0	0	0	0	0	0	Unaltered
P-0025720	Male	61	PD-1/PDL-1	Head and Neck Cancer	6.05289	2	0	0	0	0	0	0	0	0	Unaltered
P-0025766	Male	80	PD-1/PDL-1	Cancer of Unknown Primary	4.32349	2	0	0	0	0	0	0	0	0	Unaltered
P-0025827	Male	71	PD-1/PDL-1	Bladder Cancer	7.78228	4	0	0	0	0	0	0	0	0	Unaltered
P-0025888	Female	80	PD-1/PDL-1	Bladder Cancer	4.32349	8	0	0	0	0	0	0	0	0	Unaltered
P-0026063	Male	81	PD-1/PDL-1	Cancer of Unknown Primary	14.6999	8	0	0	0	0	0	0	0	0	Unaltered
P-0026114	Female	75	PD-1/PDL-1	Esophagogastric Cancer	4.32349	2	0	0	0	0	0	1	0	0	Altered
P-0026160	Male	80	PD-1/PDL-1	Bladder Cancer	1.7294	1	0	0	0	0	0	0	0	0	Unaltered
P-0026250	Female	74	PD-1/PDL-1	Esophagogastric Cancer	3.45879	3	0	1	0	0	0	0	0	0	Altered
P-0026282	Male	67	PD-1/PDL-1	Head and Neck Cancer	2.59409	3	0	0	0	0	0	0	0	0	Unaltered
P-0026298	Male	62	PD-1/PDL-1	Cancer of Unknown Primary	4.32349	1	0	0	0	1	0	0	0	0	Altered
P-0026350	Male	79	Combo	Cancer of Unknown Primary	58.7995	1	0	0	1	0	0	0	0	0	Altered
P-0026723	Male	58	PD-1/PDL-1	Bladder Cancer	6.91758	1	0	0	0	0	0	0	0	0	Unaltered
P-0026892	Male	89	PD-1/PDL-1	Bladder Cancer	6.05289	3	0	0	0	0	0	0	0	0	Unaltered
P-0026970	Male	62	PD-1/PDL-1	Bladder Cancer	25.9409	4	0	1	0	0	0	0	0	0	Altered
P-0027031	Female	32	PD-1/PDL-1	Esophagogastric Cancer	2.59409	5	0	0	0	0	0	0	0	0	Unaltered
P-0027041	Female	68	PD-1/PDL-1	Cancer of Unknown Primary	6.05289	41	0	0	0	0	0	0	0	0	Unaltered
P-0027346	Male	76	PD-1/PDL-1	Bladder Cancer	6.05289	3	0	0	0	0	0	0	0	0	Unaltered

## Sheet: S3 Mixed_Allen_2018
Supplementary Table S3. Clinical information of patients in the Mixed Allen 2018 cohort.
#1: Altered; 0: Unaltered
PATIENT_ID	SEX	AGE	DRUG_TYPE	CANCER_TYPE	TMB_NONSYNONYMOUS	OS_STATUS	OS_MONTHS	RECIST	DPF2#	SMARCC2	ARID1B	PBRM1	BCL11B	ACTL6B	BCL11A	BICRA	ACTB	BICRAL	DPF3	SMARCA2	SMARCA4	ARID2	SS18	DPF1	BRD7	SMARCC1	ARID1A	SMARCD3	SMARCB1	PHF10	SMARCD2	ACTL6A	SMARCE1	BCL7C	BRD9	SMARCD1	SS18L1	BCL7A	BCL7B	SWI/SNF_Alteration(31genes)
CR0095	Male	NA	CTLA4	Melanoma	9.06667	0	68.44	CR	1	0	0	0	0	0	0	0	0	0	0	0	0	0	0	0	0	0	0	0	0	0	0	0	0	0	0	0	0	0	0	Altered
CR04885	Female	NA	CTLA4	Melanoma	66	0	25.21	CR	0	1	1	1	1	1	1	1	0	0	0	0	0	0	0	0	0	0	0	0	0	0	0	0	0	0	0	0	0	0	0	Altered
CR06670	Female	NA	CTLA4	Melanoma	21.0667	1	44.42	CR	0	0	0	1	0	0	0	0	0	0	0	0	0	0	0	0	0	0	0	0	0	0	0	0	0	0	0	0	0	0	0	Altered
CR1509	Female	NA	CTLA4	Melanoma	19.1	0	54.03	CR	0	0	0	0	0	0	0	1	0	0	0	0	0	0	0	0	0	0	0	0	0	0	0	0	0	0	0	0	0	0	0	Altered
CR22640	Male	NA	CTLA4	Melanoma	11.5	0	51.63	CR	0	0	0	0	0	0	0	0	0	0	0	0	0	0	0	0	0	0	0	0	0	0	0	0	0	0	0	0	0	0	0	Unaltered
CR3665	Male	NA	CTLA4	Melanoma	5.16667	0	32.42	CR	0	0	0	0	0	0	0	0	0	0	0	0	0	0	0	0	0	0	0	0	0	0	0	0	0	0	0	0	0	0	0	Unaltered
CR6126	Female	NA	CTLA4	Melanoma	19.1	0	23.26	CR	0	0	1	0	0	0	0	0	1	0	0	0	0	0	0	0	0	0	0	0	0	0	0	0	0	0	0	0	0	0	0	Altered
CR6161	Male	NA	CTLA4	Melanoma	27.9333	1	31.32	CR	0	0	0	0	0	0	0	0	0	0	0	0	0	0	0	0	0	0	0	0	0	0	0	0	0	0	0	0	0	0	0	Unaltered
CR9306	Male	NA	CTLA4	Melanoma	47.6	0	63.63	CR	0	0	0	0	1	0	0	0	0	1	0	0	0	0	0	0	0	0	0	0	0	0	0	0	0	0	0	0	0	0	0	Altered
CR9699	Male	NA	CTLA4	Melanoma	43.1333	0	52.83	CR	0	0	0	0	0	0	0	0	0	0	0	0	0	0	0	0	0	0	0	0	0	0	0	0	0	0	0	0	0	0	0	Unaltered
DFCI_MM_1	Female	NA	PD-1/PDL-1	Melanoma	2.16667	0	19.74	CR	0	0	0	0	0	0	0	0	0	0	0	0	0	0	0	0	0	0	0	0	0	0	0	0	0	0	0	0	0	0	0	Unaltered
DFCI_MM_2	Female	NA	PD-1/PDL-1	Melanoma	38.3667	0	12.01	CR	0	0	0	0	0	0	0	0	0	0	1	0	0	0	0	0	0	0	0	0	0	0	0	0	0	0	0	0	0	0	0	Altered
LSD0167	Male	NA	CTLA4	Melanoma	14.0333	0	32.42	SD	0	0	0	0	0	0	0	0	0	0	0	1	0	0	0	0	0	0	0	0	0	0	0	0	0	0	0	0	0	0	0	Altered
LSD2057	Female	NA	CTLA4	Melanoma	5.86667	0	39.62	SD	0	0	0	0	0	0	0	0	0	0	0	0	0	0	0	0	0	0	0	0	0	0	0	0	0	0	0	0	0	0	0	Unaltered
LSD3484	Male	NA	CTLA4	Melanoma	17.7	0	35.46	SD	0	0	0	0	0	0	0	0	0	0	0	0	0	0	0	0	0	0	0	0	0	0	0	0	0	0	0	0	0	0	0	Unaltered
LSD4744	Male	NA	CTLA4	Melanoma	37.6667	0	25.21	SD	0	0	0	0	0	0	0	0	0	0	0	0	1	0	0	0	0	0	0	0	0	0	0	0	0	0	0	0	0	0	0	Altered
LSD6819	Male	NA	CTLA4	Melanoma	7.1	0	40.82	SD	0	0	0	0	0	0	0	0	0	0	0	0	0	1	0	0	0	0	0	0	0	0	0	0	0	0	0	0	0	0	0	Altered
MEL-582186	Female	NA	Combo	Melanoma	1.93333	0	13.65	PR	0	0	0	0	0	0	0	0	0	0	0	0	0	0	0	0	0	0	0	0	0	0	0	0	0	0	0	0	0	0	0	Unaltered
MEL-587761	Male	NA	Combo	Melanoma	6.26667	0	19.21	SD	0	0	0	0	0	0	0	0	0	0	0	0	0	0	0	0	0	0	0	0	0	0	0	0	0	0	0	0	0	0	0	Unaltered
MEL-650366	Female	NA	Combo	Melanoma	7.33333	0	26.12	PD	0	0	0	0	0	0	0	0	0	0	0	0	0	0	0	0	0	0	0	0	0	0	0	0	0	0	0	0	0	0	0	Unaltered
MEL-682321	Female	NA	Combo	Melanoma	33.3667	0	14.7	PR	0	0	1	0	0	0	0	0	0	0	0	0	0	0	1	0	0	0	0	0	0	0	0	0	0	0	0	0	0	0	0	Altered
NR1867	Male	NA	CTLA4	Melanoma	2.93333	0	18.01	PD	0	0	0	0	0	0	0	0	0	0	0	0	0	0	0	0	0	0	0	0	0	0	0	0	0	0	0	0	0	0	0	Unaltered
NR2137	Male	NA	CTLA4	Melanoma	21.2667	0	9.61	PD	0	0	0	0	0	0	0	0	0	0	0	0	0	0	0	1	0	0	0	0	0	0	0	0	0	0	0	0	0	0	0	Altered
NR3549	Male	NA	CTLA4	Melanoma	13.4333	0	6	PD	0	0	0	0	0	0	0	0	0	0	0	0	0	0	0	0	0	0	0	0	0	0	0	0	0	0	0	0	0	0	0	Unaltered
NR4018	Male	NA	CTLA4	Melanoma	4.76667	0	3.6	PD	0	0	0	0	0	0	0	0	0	0	0	0	0	0	0	0	0	0	0	0	0	0	0	0	0	0	0	0	0	0	0	Unaltered
NR4045	Male	NA	CTLA4	Melanoma	14.6333	0	20.41	PD	0	0	0	0	0	0	0	0	0	0	0	0	0	0	0	0	0	0	0	0	0	0	0	0	0	0	0	0	0	0	0	Unaltered
NR4083	Male	NA	CTLA4	Melanoma	11.0667	0	2.76	PD	0	0	0	0	0	0	0	0	1	0	0	0	0	0	0	0	0	0	0	0	0	0	0	0	0	0	0	0	0	0	0	Altered
NR4631	Male	NA	CTLA4	Melanoma	38.6333	0	6	PD	0	0	0	0	1	0	0	0	0	0	0	0	0	1	0	0	0	0	0	0	0	0	0	0	0	0	0	0	0	0	0	Altered
NR4810	Female	NA	CTLA4	Melanoma	12.6	0	4.8	PD	0	0	0	0	0	0	0	0	0	0	0	0	0	0	0	0	0	0	0	0	0	0	0	0	0	0	0	0	0	0	0	Unaltered
NR4949	Female	NA	CTLA4	Melanoma	19.8	0	8.4	PD	0	0	0	0	0	0	0	0	0	1	0	0	0	0	0	1	0	1	0	0	0	0	0	0	0	0	0	0	0	0	0	Altered
NR8815	Female	NA	CTLA4	Melanoma	56.5667	0	14.41	PD	0	0	0	0	1	0	0	0	0	1	0	0	0	0	0	0	0	0	0	0	0	0	0	0	0	0	0	0	0	0	0	Altered
NR9445	Male	NA	CTLA4	Melanoma	8.66667	0	2.4	PD	0	0	0	0	0	0	0	0	0	0	0	0	0	0	0	0	0	0	0	0	0	0	0	0	0	0	0	0	0	0	0	Unaltered
NR9449	Female	NA	CTLA4	Melanoma	9.7	0	7.2	PD	0	0	0	0	1	0	0	0	0	0	0	0	0	0	0	0	0	0	0	0	0	0	0	0	0	0	0	0	0	0	0	Altered
NR9521	Male	NA	CTLA4	Melanoma	36.1	0	32.42	PD	0	0	0	0	0	0	0	0	0	1	0	0	0	1	0	0	0	0	0	0	0	0	0	0	0	0	0	0	0	0	0	Altered
NR9705	Female	NA	CTLA4	Melanoma	0.9	0	14.41	PD	0	0	0	0	0	0	0	0	0	0	0	0	0	0	0	0	0	0	0	0	0	0	0	0	0	0	0	0	0	0	0	Unaltered
NR9765	Female	NA	CTLA4	Melanoma	2.73333	0	25.21	PD	0	0	0	0	0	0	0	0	0	0	0	0	0	0	0	0	0	0	0	0	0	0	0	0	0	0	0	0	0	0	0	Unaltered
PR12117	Male	NA	CTLA4	Melanoma	37.4	1	19.21	PR	0	0	1	0	0	0	1	1	0	0	0	0	0	1	0	1	0	0	1	0	0	0	0	0	0	0	0	0	0	0	0	Altered
PR4035	Male	NA	CTLA4	Melanoma	17.5667	0	50.43	PR	0	0	0	1	0	1	0	0	0	0	0	0	0	0	0	0	0	0	0	0	0	0	0	0	0	0	0	0	0	0	0	Altered
PR4046	Male	NA	CTLA4	Melanoma	4.46667	0	25.33	PR	0	0	0	0	0	0	0	0	0	0	0	0	0	0	0	0	0	0	0	0	0	0	0	0	0	0	0	0	0	0	0	Unaltered
PR4077	Male	NA	CTLA4	Melanoma	57.2333	0	73.24	PR	0	0	0	0	0	0	1	0	0	0	0	0	0	1	0	0	0	0	1	0	0	0	0	0	0	0	0	0	0	0	0	Altered
PR4091	Female	NA	CTLA4	Melanoma	9.06667	0	72.3	PR	0	0	0	0	0	0	0	0	0	0	0	0	0	0	0	0	0	0	0	0	0	0	0	0	0	0	0	0	0	0	0	Unaltered
PR4092	Female	NA	CTLA4	Melanoma	116.3	0	73.24	PR	0	0	1	1	0	1	0	0	0	0	0	1	1	1	0	0	0	0	0	0	0	0	0	0	0	0	0	0	0	0	0	Altered
Pat02	Female	42	CTLA4	Melanoma	7	0	53.68	SD	0	0	0	0	0	0	0	0	0	0	0	0	0	0	0	0	0	0	0	0	0	0	0	0	0	0	0	0	0	0	0	Unaltered
Pat03	Female	61	CTLA4	Melanoma	14.9	1	3.29	PD	0	0	0	0	0	0	0	0	0	0	0	0	0	0	0	1	1	1	0	0	0	0	0	0	0	0	0	0	0	0	0	Altered
Pat04	Male	71	CTLA4	Melanoma	13.8333	0	32.47	PR	0	0	0	0	0	0	0	0	0	0	0	0	0	0	0	0	0	0	0	0	0	0	0	0	0	0	0	0	0	0	0	Unaltered
Pat06	Male	33	CTLA4	Melanoma	5.06667	1	5.3	PD	0	0	0	0	0	0	0	0	0	0	0	0	0	0	0	0	0	0	0	0	0	0	0	0	0	0	0	0	0	0	0	Unaltered
Pat07	Male	35	CTLA4	Melanoma	5.8	0	34.54	SD	0	0	0	0	0	0	0	0	0	0	0	0	0	0	0	0	0	0	0	0	0	0	0	0	0	0	0	0	0	0	0	Unaltered
Pat08	Male	73	CTLA4	Melanoma	8.7	1	4.61	PD	0	0	0	0	0	0	0	0	0	0	0	0	1	0	0	0	0	0	0	0	0	0	0	0	0	0	0	0	0	0	0	Altered
Pat100	Male	71	CTLA4	Melanoma	18.4	1	11.84	PD	0	0	0	0	0	0	0	0	0	0	0	0	0	1	0	0	0	0	0	0	0	0	0	0	0	0	0	0	0	0	0	Altered
Pat101	Male	75	CTLA4	Melanoma	2.46667	1	9.47	PD	0	0	0	0	0	0	0	0	0	0	0	0	0	0	0	0	0	0	0	0	0	0	0	0	0	0	0	0	0	0	0	Unaltered
Pat103	Male	70	CTLA4	Melanoma	25.3	1	34.47	PR	0	0	0	1	1	0	0	0	0	0	0	0	0	1	0	0	0	0	0	0	0	0	0	0	0	0	0	0	0	0	0	Altered
Pat104	Female	45	CTLA4	Melanoma	1.23333	1	7.8	SD	0	0	0	0	0	0	0	0	0	0	0	0	0	0	0	0	0	0	0	0	0	0	0	0	0	0	0	0	0	0	0	Unaltered
Pat105	Male	41	CTLA4	Melanoma	4.8	0	34.44	PR	0	0	0	0	0	0	0	0	0	0	0	0	0	0	0	0	0	0	0	0	0	0	0	0	0	0	0	0	0	0	0	Unaltered
Pat106	Female	43	CTLA4	Melanoma	0.766667	1	8.22	PD	0	0	0	0	0	0	0	0	0	0	0	0	0	0	0	0	0	0	0	0	0	0	0	0	0	0	0	0	0	0	0	Unaltered
Pat11	Male	67	CTLA4	Melanoma	66.3	0	25.99	PD	0	0	0	0	0	0	0	0	0	0	0	0	0	0	0	0	0	0	1	1	0	0	0	0	0	0	0	0	0	0	0	Altered
Pat110	Male	76	CTLA4	Melanoma	216.733	1	10.53	PD	0	0	0	0	1	0	0	0	0	0	0	0	1	0	0	0	1	0	1	0	1	1	0	0	0	0	0	0	0	0	0	Altered
Pat111	Male	84	CTLA4	Melanoma	46.2	1	20.33	PD	0	0	1	0	0	0	0	0	1	0	0	0	0	1	0	0	0	0	0	0	0	0	0	0	0	0	0	0	0	0	0	Altered
Pat113	Male	68	CTLA4	Melanoma	10.2	1	9.9	PR	0	0	0	0	0	0	0	0	0	0	0	0	0	0	0	0	0	0	0	0	0	0	0	0	0	0	0	0	0	0	0	Unaltered
Pat115	Male	46	CTLA4	Melanoma	2.4	1	4.77	PD	0	0	0	0	0	0	0	0	0	0	0	0	0	1	0	0	0	0	0	0	0	0	0	0	0	0	0	0	0	0	0	Altered
Pat117	Male	74	CTLA4	Melanoma	23.6333	0	30.07	PR	0	0	0	0	0	0	0	0	0	0	0	0	0	1	0	0	0	0	0	0	0	0	0	0	0	0	0	0	0	0	0	Altered
Pat118	Female	43	CTLA4	Melanoma	4.03333	1	10.3	PD	0	0	0	1	0	0	0	0	0	0	0	0	0	0	0	0	0	0	0	0	0	0	0	0	0	0	0	0	0	0	0	Altered
Pat119	Male	61	CTLA4	Melanoma	10.1	0	26.58	PD	0	0	0	0	0	0	0	0	0	0	0	0	0	0	0	0	0	0	0	0	0	0	1	0	0	0	0	0	0	0	0	Altered
Pat12	Male	41	CTLA4	Melanoma	3.36667	1	9.54	PD	0	0	0	0	0	0	0	0	0	0	0	0	0	0	0	0	0	0	0	0	0	0	0	0	0	0	0	0	0	0	0	Unaltered
Pat121	Male	47	CTLA4	Melanoma	3.7	1	4.01	PD	0	0	0	0	0	0	0	0	0	0	0	0	0	0	0	0	0	0	0	0	0	0	0	0	0	0	0	0	0	0	0	Unaltered
Pat123	Female	49	CTLA4	Melanoma	17.7	1	28.06	SD	0	0	0	0	0	0	0	0	0	0	0	0	0	0	0	0	0	0	0	0	0	0	0	0	0	0	0	0	0	0	0	Unaltered
Pat124	Male	78	CTLA4	Melanoma	13.3667	1	4.8	PD	0	0	0	0	0	0	0	0	0	0	0	0	0	0	0	0	0	0	0	0	0	0	0	0	0	0	0	0	0	0	0	Unaltered
Pat126	Male	77	CTLA4	Melanoma	14.2	0	21.09	PR	0	0	0	0	0	0	0	0	0	0	0	0	0	0	0	0	0	0	0	0	0	0	0	0	0	0	0	0	0	0	0	Unaltered
Pat127	Female	24	CTLA4	Melanoma	3.96667	1	10.92	PD	0	0	0	0	0	0	0	0	0	0	0	0	0	0	0	0	0	0	0	0	0	0	0	0	0	0	0	0	0	0	0	Unaltered
Pat128	Male	30	CTLA4	Melanoma	2.76667	1	3.72	PD	0	0	0	0	0	0	0	0	0	0	0	0	0	0	0	0	0	0	0	0	0	0	0	0	0	0	0	0	0	0	0	Unaltered
Pat129	Male	18	CTLA4	Melanoma	3.83333	0	17.73	PD	0	0	0	0	0	0	0	0	0	0	0	0	0	0	0	0	0	0	0	0	0	0	0	0	0	0	0	0	0	0	0	Unaltered
Pat13	Male	78	CTLA4	Melanoma	4.3	1	24.08	PD	0	0	0	0	0	0	0	0	0	0	0	0	0	0	0	0	0	0	0	0	0	0	0	0	0	0	0	0	0	0	0	Unaltered
Pat132	Male	81	CTLA4	Melanoma	76.5	0	22.24	PR	1	1	1	0	0	0	0	0	0	0	0	1	0	1	1	0	0	0	0	0	0	0	0	1	0	0	0	0	0	0	0	Altered
Pat133	Male	75	CTLA4	Melanoma	9.1	1	17.83	PD	0	0	0	0	0	0	0	0	0	0	0	0	0	0	0	0	0	0	1	0	0	0	0	0	0	0	0	0	0	0	0	Altered
Pat134	Male	73	CTLA4	Melanoma	13.1667	1	9.93	PD	0	0	0	0	0	0	0	0	0	0	0	0	0	0	0	0	0	0	0	0	0	0	0	0	0	0	0	0	0	0	0	Unaltered
Pat135	Female	29	CTLA4	Melanoma	6.1	1	2.66	PD	0	0	0	0	0	0	0	0	0	0	0	0	0	0	0	0	0	0	0	0	0	0	0	0	0	0	0	0	0	0	0	Unaltered
Pat138	Female	39	CTLA4	Melanoma	196.633	1	48.62	SD	0	1	1	1	1	1	0	1	0	1	0	0	0	1	0	1	0	0	1	0	0	1	0	1	1	0	0	0	0	0	0	Altered
Pat139	Male	58	CTLA4	Melanoma	46.4667	1	3.26	PD	0	1	1	0	0	1	0	0	0	0	0	0	1	1	0	0	0	0	0	0	0	0	0	0	0	0	0	0	0	0	0	Altered
Pat14	Female	47	CTLA4	Melanoma	1.7	1	5.36	PD	0	0	0	0	0	0	0	0	0	0	0	0	0	0	0	0	0	0	0	0	0	0	0	0	0	0	0	0	0	0	0	Unaltered
Pat140	Male	62	CTLA4	Melanoma	11.0667	1	16.18	PD	0	0	0	0	0	0	0	0	0	0	0	0	0	0	0	0	0	0	0	0	0	0	0	0	0	0	0	0	0	0	0	Unaltered
Pat143	Male	71	CTLA4	Melanoma	31.5667	1	5.03	PD	0	0	0	0	1	0	1	1	0	0	0	0	0	0	0	0	0	0	0	0	0	0	0	0	0	0	0	0	0	0	0	Altered
Pat144	Male	65	CTLA4	Melanoma	9.1	1	28.62	PR	0	0	0	0	0	0	0	0	0	0	0	0	0	0	0	0	0	0	0	0	1	0	0	0	0	0	0	0	0	0	0	Altered
Pat147	Male	63	CTLA4	Melanoma	19.4667	1	7.37	PD	0	0	0	0	0	0	0	0	0	0	0	0	0	0	0	0	0	0	0	0	0	0	0	0	0	0	0	0	0	0	0	Unaltered
Pat148	Female	36	CTLA4	Melanoma	8.53333	1	2.76	PD	0	0	0	0	0	0	0	0	0	0	0	0	0	0	0	0	0	0	0	0	0	0	0	0	0	0	0	0	0	0	0	Unaltered
Pat15	Male	32	CTLA4	Melanoma	8.46667	1	1.64	PD	0	0	0	0	0	0	0	0	0	0	0	1	0	0	0	0	0	0	0	0	0	0	0	0	0	0	0	0	0	0	0	Altered
Pat151	Male	68	CTLA4	Melanoma	86.2333	1	6.71	PD	0	0	0	1	0	0	0	0	1	0	0	0	0	1	0	0	0	0	0	0	0	0	0	0	0	0	0	0	0	0	0	Altered
Pat157	Female	69	CTLA4	Melanoma	4.56667	1	2.83	X	0	0	0	0	0	0	0	0	0	0	0	0	0	0	0	0	0	0	0	0	0	0	0	0	0	0	0	0	0	0	0	Unaltered
Pat159	Male	52	CTLA4	Melanoma	19.3333	0	27.7	PD	1	1	0	0	0	0	0	0	1	0	0	0	0	1	0	0	0	0	1	0	0	0	0	0	0	1	0	0	0	0	0	Altered
Pat16	Female	68	CTLA4	Melanoma	63	1	26.68	PD	0	0	0	0	0	0	0	0	0	1	1	0	1	0	0	0	0	0	0	0	0	0	0	0	0	0	0	0	0	0	0	Altered
Pat160	Male	79	CTLA4	Melanoma	1.8	1	5	PD	0	0	0	0	0	0	0	0	0	0	0	0	0	0	0	0	0	0	0	0	0	0	0	0	0	0	0	0	0	0	0	Unaltered
Pat162	Female	55	CTLA4	Melanoma	2.6	1	6.94	PD	0	0	0	0	0	0	0	0	0	0	0	0	0	0	0	0	0	0	0	0	0	0	0	0	0	0	0	0	0	0	0	Unaltered
Pat163	Male	54	CTLA4	Melanoma	3.8	0	24.64	PD	0	0	0	0	0	0	0	0	0	0	0	0	0	0	0	0	0	0	1	0	0	0	0	0	0	0	0	0	0	0	0	Altered
Pat166	Male	31	CTLA4	Melanoma	1.26667	1	2.53	X	0	0	0	0	0	0	0	0	0	0	0	0	0	0	0	0	0	0	0	0	0	0	0	0	0	0	0	0	0	0	0	Unaltered
Pat167	Male	50	CTLA4	Melanoma	2.03333	1	13.42	PD	0	0	0	0	0	0	0	0	0	0	0	0	0	0	0	0	0	0	0	0	0	0	0	0	0	0	0	0	0	0	0	Unaltered
Pat168	Male	69	CTLA4	Melanoma	8.96667	1	2.2	X	0	0	0	0	0	0	0	0	0	0	0	0	0	0	0	0	0	0	0	0	0	0	0	0	0	0	0	0	0	0	0	Unaltered
Pat17	Male	44	CTLA4	Melanoma	7.16667	1	6.74	PD	0	0	0	0	0	0	0	0	0	0	0	0	0	0	0	0	0	0	0	0	0	0	0	0	0	0	0	0	0	0	0	Unaltered
Pat170	Male	48	CTLA4	Melanoma	7.46667	1	3.55	PD	0	0	0	0	0	0	0	0	0	0	0	0	0	0	0	0	0	0	0	0	0	0	0	0	0	0	0	0	0	0	0	Unaltered
Pat171	Male	66	CTLA4	Melanoma	2.96667	1	15.33	PD	0	0	0	0	0	0	0	0	0	0	0	0	0	0	0	0	0	0	0	0	0	0	0	0	0	0	0	0	0	0	0	Unaltered
Pat174	Female	57	CTLA4	Melanoma	22.1	0	22.63	PR	0	0	1	0	0	0	0	0	0	0	0	0	0	1	0	0	0	0	0	0	0	0	0	0	0	0	0	0	0	0	0	Altered
Pat175	Female	66	CTLA4	Melanoma	3.66667	1	2.96	X	0	0	0	0	0	0	0	0	0	0	0	0	0	0	0	0	0	0	0	0	0	0	0	0	0	0	0	0	0	0	0	Unaltered
Pat18	Female	55	CTLA4	Melanoma	1.3	0	37.3	PD	0	0	0	0	0	0	0	0	0	0	0	0	0	0	0	0	0	0	0	0	0	0	0	0	0	0	0	0	0	0	0	Unaltered
Pat21	Male	81	CTLA4	Melanoma	47.6667	1	22.24	SD	0	0	1	0	0	0	1	0	0	0	1	1	0	0	0	0	0	0	0	0	0	0	1	0	0	0	0	0	0	0	0	Altered
Pat24	Female	74	CTLA4	Melanoma	1.26667	0	31.94	PR	0	0	0	0	0	0	0	0	0	0	0	0	0	0	0	0	0	0	0	0	0	0	0	0	0	0	0	0	0	0	0	Unaltered
Pat27	Male	61	CTLA4	Melanoma	1.56667	0	45.36	PD	0	1	0	0	0	0	0	0	0	0	0	0	0	0	0	0	0	0	0	0	0	0	0	0	0	0	0	0	0	0	0	Altered
Pat32	Male	73	CTLA4	Melanoma	24.0333	1	4.84	PD	0	0	0	0	0	0	0	0	0	0	0	0	0	0	0	0	0	0	0	0	0	0	0	0	0	0	0	0	0	0	0	Unaltered
Pat39	Male	67	CTLA4	Melanoma	2.6	0	48.91	CR	0	0	1	0	0	0	0	0	0	0	0	0	0	0	0	0	0	0	0	0	0	0	0	0	0	0	0	0	0	0	0	Altered
Pat41	Male	64	CTLA4	Melanoma	11.9333	1	4.21	PD	0	0	0	0	0	0	0	0	0	0	0	0	0	0	0	0	0	0	0	0	0	0	0	0	0	0	0	0	0	0	0	Unaltered
Pat43	Female	75	CTLA4	Melanoma	7.36667	1	1.22	PD	0	0	0	0	0	0	0	0	0	0	0	0	0	0	0	0	0	0	0	0	0	0	0	0	0	0	0	0	0	0	0	Unaltered
Pat45	Male	69	CTLA4	Melanoma	30.7333	1	2.93	PD	0	0	0	0	0	0	0	0	0	0	0	0	0	0	0	0	0	0	0	0	0	0	0	0	0	0	0	0	0	0	0	Unaltered
Pat46	Female	37	CTLA4	Melanoma	9.63333	1	5.26	PD	0	0	0	0	0	0	0	0	0	0	0	0	0	0	0	0	0	0	1	0	0	0	0	0	0	0	0	0	0	0	0	Altered
Pat47	Male	78	CTLA4	Melanoma	5.1	0	36.38	CR	0	0	0	0	0	0	0	0	0	0	0	0	0	0	0	0	0	0	0	0	0	0	0	0	0	0	0	0	0	0	0	Unaltered
Pat49	Male	36	CTLA4	Melanoma	22.5333	0	34.01	SD	0	0	0	0	0	0	1	0	0	0	0	0	1	0	0	0	0	0	0	0	0	0	0	0	0	0	0	0	0	0	0	Altered
Pat50	Male	77	CTLA4	Melanoma	14.8	1	2.14	PD	0	0	0	0	0	0	0	0	0	0	0	0	0	0	0	0	0	0	0	0	0	0	0	0	0	0	0	0	0	0	0	Unaltered
Pat52	Male	65	CTLA4	Melanoma	13.1	1	6.22	PD	0	0	0	0	0	0	0	0	0	0	0	0	1	0	0	0	0	0	0	0	0	0	0	0	0	0	0	0	0	0	0	Altered
Pat54	Male	73	CTLA4	Melanoma	29.6	1	6.84	PD	0	0	0	0	0	0	0	0	0	1	0	0	0	0	0	0	0	0	0	0	0	0	0	0	0	0	0	0	0	0	0	Altered
Pat55	Female	71	CTLA4	Melanoma	17.3	1	6.35	PD	0	0	0	0	0	0	0	0	0	0	0	0	0	0	0	0	0	0	0	0	0	0	0	0	0	0	0	0	0	0	0	Unaltered
Pat56	Male	68	CTLA4	Melanoma	1.83333	1	7.73	PD	0	0	0	0	0	0	0	0	0	0	0	0	0	0	0	0	0	0	0	0	0	0	0	0	0	0	0	0	0	0	0	Unaltered
Pat57	Male	69	CTLA4	Melanoma	2.16667	1	8.22	PD	0	0	0	0	0	0	0	0	0	0	0	0	0	0	0	0	0	0	0	0	0	0	0	0	0	0	0	0	0	0	0	Unaltered
Pat58	Female	59	CTLA4	Melanoma	91.0667	1	21.45	PD	1	1	0	0	0	0	0	0	0	0	0	0	0	1	0	0	0	0	0	1	0	1	0	0	0	0	1	0	0	0	0	Altered
Pat59	Male	36	CTLA4	Melanoma	9.06667	1	7.37	PD	0	0	0	0	0	0	0	0	0	0	0	0	0	0	0	0	0	0	0	0	0	0	0	0	0	0	0	0	0	0	0	Unaltered
Pat60	Male	86	CTLA4	Melanoma	25.9333	1	8.95	PD	0	0	0	0	0	0	0	0	0	0	0	0	0	0	0	0	0	0	0	0	0	0	0	0	0	0	0	0	0	0	0	Unaltered
Pat61	Female	78	CTLA4	Melanoma	0.433333	1	3.98	PD	0	0	0	0	0	0	0	0	0	0	0	0	0	0	0	0	0	0	0	0	0	0	0	0	0	0	0	0	0	0	0	Unaltered
Pat62	Male	76	CTLA4	Melanoma	56.7333	1	19.8	PD	0	0	0	0	1	0	0	0	0	0	0	0	0	0	0	0	0	0	1	0	0	0	0	0	0	0	0	1	0	0	0	Altered
Pat64	Male	83	CTLA4	Melanoma	22.4	1	3.49	PD	0	0	0	0	0	0	0	0	0	0	0	0	0	0	0	0	0	0	1	0	0	0	0	0	0	0	0	0	0	0	0	Altered
Pat66	Female	44	CTLA4	Melanoma	10.9	0	21.48	SD	0	0	0	0	0	0	0	0	0	0	0	0	0	1	0	0	0	0	0	0	0	0	0	0	0	0	0	0	1	0	0	Altered
Pat67	Male	40	CTLA4	Melanoma	1	1	2.6	PD	0	0	0	0	0	0	0	0	0	0	0	0	0	0	0	0	0	0	0	0	0	0	0	0	0	0	0	0	0	0	0	Unaltered
Pat71	Male	64	CTLA4	Melanoma	27.4333	1	4.51	PD	0	1	0	0	0	0	0	0	0	0	0	0	0	0	0	0	0	0	0	0	0	0	0	0	0	0	0	0	0	0	0	Altered
Pat73	Male	71	CTLA4	Melanoma	7.73333	1	14.54	PR	0	0	0	0	0	0	0	0	0	0	0	0	0	0	0	0	0	0	0	0	0	0	0	0	0	0	0	0	0	0	0	Unaltered
Pat74	Male	73	CTLA4	Melanoma	17.7	1	6.35	PD	0	0	1	0	0	0	0	0	0	0	0	0	0	0	0	0	0	0	0	0	0	0	0	0	0	0	0	0	0	0	0	Altered
Pat76	Male	74	CTLA4	Melanoma	7.06667	1	4.57	PD	0	0	0	0	1	0	0	0	0	0	0	0	0	0	0	0	0	0	0	0	0	0	0	0	0	0	0	0	0	0	0	Altered
Pat77	Male	22	CTLA4	Melanoma	12.4667	0	33.85	PR	0	1	0	0	0	0	0	0	0	0	0	0	0	0	0	0	0	0	0	0	0	0	0	0	0	0	0	0	0	0	0	Altered
Pat79	Male	69	CTLA4	Melanoma	10.2667	1	26.35	PR	0	0	0	0	0	0	1	0	1	0	0	0	0	0	0	0	0	0	0	0	0	0	0	0	0	0	0	0	0	0	0	Altered
Pat80	Male	47	CTLA4	Melanoma	7.4	1	23.82	SD	0	0	0	0	0	0	0	0	0	0	0	0	0	0	0	0	0	0	0	0	0	0	0	0	0	0	0	0	0	0	0	Unaltered
Pat81	Female	54	CTLA4	Melanoma	3.6	1	20.66	PD	0	0	0	0	0	0	0	0	0	0	0	0	0	0	0	0	0	0	0	0	0	0	0	0	0	0	0	0	0	0	0	Unaltered
Pat82	Female	54	CTLA4	Melanoma	14.5667	1	3.42	PD	0	0	0	0	0	0	0	0	0	0	0	0	0	0	0	0	0	0	0	0	0	0	0	0	0	0	0	0	0	0	0	Unaltered
Pat83	Male	22	CTLA4	Melanoma	1.9	0	33.78	PD	0	0	0	0	0	0	0	0	0	0	0	0	0	0	0	0	0	0	0	0	0	0	0	0	0	0	0	0	0	0	0	Unaltered
Pat85	Male	83	CTLA4	Melanoma	17.7	1	15.07	PD	0	0	0	0	0	0	0	0	0	0	0	0	0	0	0	0	0	0	1	0	0	0	0	0	0	0	0	0	0	0	0	Altered
Pat86	Male	54	CTLA4	Melanoma	2.66667	1	9.64	SD	0	0	0	0	0	0	0	0	0	0	0	0	0	0	0	0	0	0	0	0	0	0	0	0	0	0	0	0	0	0	0	Unaltered
Pat87	Male	47	CTLA4	Melanoma	1.33333	0	35.95	PD	0	0	0	0	0	0	0	0	0	0	0	0	0	0	0	0	0	0	0	0	0	0	0	0	0	0	0	0	0	0	0	Unaltered
Pat90	Male	59	CTLA4	Melanoma	7.5	0	33.06	PR	0	0	0	0	0	0	0	0	0	0	0	1	0	0	0	0	0	0	0	0	0	0	0	0	0	0	0	0	0	0	0	Altered
Pat98	Female	57	CTLA4	Melanoma	2.33333	1	4.61	PD	0	0	0	0	0	0	0	0	0	0	0	0	0	0	0	0	0	0	0	0	0	0	0	0	0	0	0	0	0	0	0	Unaltered
Pat99	Female	36	CTLA4	Melanoma	0.866667	1	11.58	PD	0	0	0	0	0	0	0	0	0	0	0	0	0	0	0	0	0	0	0	0	0	0	0	0	0	0	0	0	0	0	0	Unaltered
SD0346	Female	NA	CTLA4	Melanoma	18.8333	1	34.82	SD	0	0	0	0	0	0	1	0	0	0	0	0	1	1	0	0	0	0	0	0	0	0	0	0	0	0	0	0	0	0	0	Altered
SD1494	Male	NA	CTLA4	Melanoma	30.8	0	24.01	SD	0	0	1	0	0	1	1	0	0	0	0	0	1	0	0	0	0	0	0	0	0	1	0	0	0	0	0	0	0	0	0	Altered
SD2051	Female	NA	CTLA4	Melanoma	1.13333	1	9.61	SD	0	0	0	0	0	0	0	0	0	0	0	0	0	0	0	0	0	0	0	0	0	0	0	0	0	0	0	0	0	0	0	Unaltered
SD2056	Female	NA	CTLA4	Melanoma	5	0	47.89	SD	0	0	0	0	0	0	0	0	0	0	0	1	0	0	0	0	0	0	0	0	0	0	0	0	0	0	0	0	0	0	0	Altered
SD5038	Male	NA	CTLA4	Melanoma	9.33333	1	14.41	SD	0	0	0	0	0	0	0	1	0	0	0	0	0	0	0	0	0	0	0	0	0	0	0	0	0	0	0	0	0	0	0	Altered
SD5118	Female	NA	CTLA4	Melanoma	2.43333	1	32.42	SD	0	0	0	0	0	0	0	0	0	0	0	0	0	0	0	0	0	0	0	0	0	0	0	0	0	0	0	0	0	0	0	Unaltered
SD5934	Male	NA	CTLA4	Melanoma	5.56667	1	19.21	SD	0	0	0	0	0	0	0	0	0	0	0	0	0	0	0	0	0	0	0	0	0	0	0	0	0	0	0	0	0	0	0	Unaltered
SD6336	Male	NA	CTLA4	Melanoma	11.4333	0	83.13	SD	0	0	0	0	0	0	0	0	0	0	0	0	0	0	0	0	0	0	0	0	0	0	0	0	0	0	0	0	0	0	0	Unaltered
SD6494	Female	NA	CTLA4	Melanoma	20.8333	1	8.4	SD	0	0	0	0	1	0	0	0	0	0	0	0	0	0	0	0	0	0	0	0	0	0	0	0	0	0	0	0	0	0	0	Altered
SD7357	Female	NA	CTLA4	Melanoma	40.5667	1	24.01	SD	0	0	1	0	0	0	0	0	0	0	0	0	0	0	0	0	0	0	0	0	0	0	0	0	0	0	0	0	0	0	0	Altered

## Sheet: S4 MEL_DFCI_2019
Supplementary Table S4. Clinical information of patients in the MEL DFCI 2019 cohort.
#1: Altered; 0: Unaltered
PATIENT_ID	SEX	DRUG_TYPE	CANCER_TYPE	M_STAGE	TMB_NONSYNONYMOUS	OS_STATUS	OS_MONTHS	RECIST	BICRA#	SMARCD1	ARID1B	ARID1A	BCL11B	SMARCB1	ARID2	DPF3	PBRM1	SMARCA4	ACTB	SMARCC1	BICRAL	SMARCC2	BCL11A	ACTL6B	BRD7	SMARCE1	BRD9	ACTL6A	BCL7B	SMARCD3	DPF1	SS18	BCL7A	SMARCA2	SS18L1	BCL7C	DPF2	PHF10	SMARCD2	SWI/SNF_Alteration(31genes)
Patient1	Female	PD-1	Melanoma	M1c	0.666667	1	9.43333	PD	0	0	0	0	0	0	0	0	0	0	0	0	0	0	0	0	0	0	0	0	0	0	0	0	0	0	0	0	0	0	0	Unaltered
Patient10	Female	PD-1	Melanoma	M1c	2.36667	1	37.9667	PR	0	0	0	0	0	0	0	0	0	0	0	0	0	0	0	0	0	0	0	0	0	0	0	0	0	0	0	0	0	0	0	Unaltered
Patient100	Female	PD-1	Melanoma	M1c	4.2	1	31.2667	PR	0	0	0	0	0	0	0	0	0	0	0	0	0	0	0	0	0	0	0	0	0	0	0	0	0	0	0	0	0	0	0	Unaltered
Patient102	Male	PD-1	Melanoma	M1c	8.2	0	26.1667	NA	0	0	0	0	0	0	0	0	0	0	0	0	0	0	0	0	0	0	0	0	0	0	0	0	0	0	0	0	0	0	0	Unaltered
Patient104	Female	PD-1	Melanoma	M1c	3.2	0	26.3	PR	1	0	0	0	0	0	0	0	0	0	0	0	0	0	0	0	0	0	0	0	0	0	0	0	0	0	0	0	0	0	0	Altered
Patient105	Female	PD-1	Melanoma	M1c	4.2	1	17.3667	NA	0	0	0	0	0	0	0	0	0	0	0	0	0	0	0	0	0	0	0	0	0	0	0	0	0	0	0	0	0	0	0	Unaltered
Patient106	Female	PD-1	Melanoma	M1c	8.23333	0	26	CR	0	0	0	0	0	0	0	0	0	0	0	0	0	1	0	0	0	0	0	0	0	0	0	0	0	0	0	0	0	0	0	Altered
Patient107	Male	PD-1	Melanoma	M1c	5.3	1	1.56667	PR	0	0	0	0	0	0	0	0	0	0	0	0	0	0	0	0	0	0	0	0	0	0	0	0	0	0	0	0	0	0	0	Unaltered
Patient108	Male	PD-1	Melanoma	M1c	1.46667	1	5.5	PD	0	0	0	0	0	0	0	0	0	0	0	0	0	0	0	0	0	0	0	0	0	0	0	0	0	0	0	0	0	0	0	Unaltered
Patient11	Female	PD-1	Melanoma	M1c	5.66667	1	5.33333	PD	0	0	0	0	0	0	0	0	0	0	0	0	0	0	0	0	0	0	0	0	0	0	0	0	0	1	0	0	0	0	0	Altered
Patient110	Female	PD-1	Melanoma	M1c	33.5	0	16.8667	PD	0	0	0	0	0	0	1	1	0	0	0	0	0	0	0	0	0	0	0	0	0	0	0	0	0	0	0	0	0	0	0	Altered
Patient112	Female	PD-1	Melanoma	M1c	8.03333	1	17.3667	PD	0	0	0	0	0	0	0	0	0	0	0	0	0	0	0	0	0	0	0	0	0	0	0	0	0	0	0	0	0	0	0	Unaltered
Patient116	Female	PD-1	Melanoma	M1c	7.66667	1	3.93333	PD	1	0	0	0	0	0	0	0	0	0	0	0	0	0	0	0	0	0	0	0	0	0	0	0	0	0	0	0	0	0	0	Altered
Patient117	Female	PD-1	Melanoma	M1c	1.13333	1	9.83333	PD	0	0	0	0	0	0	0	0	0	0	0	0	0	0	0	0	0	0	0	0	0	0	0	0	0	0	0	0	0	0	0	Unaltered
Patient118	Female	PD-1	Melanoma	M1c	7.36667	0	43.8667	PR	0	0	0	0	0	0	0	0	0	0	0	0	0	0	0	0	0	0	0	0	0	0	0	0	0	0	0	0	0	0	0	Unaltered
Patient119	Female	PD-1	Melanoma	M1c	2.7	1	8.66667	PD	0	0	0	0	0	0	0	0	0	0	0	0	0	0	0	0	0	0	0	0	0	0	0	0	0	0	0	0	0	0	0	Unaltered
Patient120	Female	PD-1	Melanoma	M1c	36.1667	0	43.7	CR	0	0	0	0	1	0	0	0	0	0	0	0	0	0	0	0	0	0	0	0	0	0	0	0	0	0	0	0	0	0	0	Altered
Patient121	Female	PD-1	Melanoma	M1c	25.5667	0	43.5333	PR	1	0	1	0	0	0	0	0	0	0	1	0	0	1	0	0	0	0	0	0	0	0	0	0	0	0	0	0	0	0	0	Altered
Patient125	Male	PD-1	Melanoma	M1c	1.86667	0	32.6	CR	0	0	0	0	0	0	0	0	0	0	0	0	0	0	0	0	0	0	0	0	0	0	0	0	0	0	0	0	0	0	0	Unaltered
Patient126	Male	PD-1	Melanoma	M1c	21.6667	0	33.0667	PR	0	0	0	0	0	0	0	0	0	0	0	0	0	0	0	0	0	0	0	0	0	0	0	0	0	0	0	0	0	0	0	Unaltered
Patient127	Male	PD-1	Melanoma	M1c	13.7333	0	28.8667	CR	0	0	0	0	0	0	0	0	0	0	0	0	0	0	0	0	0	0	0	0	0	0	0	0	0	0	0	0	0	0	0	Unaltered
Patient13	Male	PD-1	Melanoma	M1c	19.6	1	1.93333	PD	0	0	0	0	0	0	0	0	0	0	0	0	0	0	0	0	0	0	0	0	0	0	0	0	0	0	0	0	0	0	0	Unaltered
Patient130	Female	PD-1	Melanoma	M1c	9.4	1	6.4	PD	0	0	0	0	0	0	0	0	0	1	0	0	0	0	0	0	0	0	0	0	0	0	0	0	0	0	0	0	0	0	0	Altered
Patient131	Male	PD-1	Melanoma	M1b	10.3333	0	27.7667	PR	0	0	0	0	0	0	0	0	0	0	1	0	0	0	0	0	0	0	0	0	0	0	0	0	0	0	0	0	0	0	0	Altered
Patient132	Male	PD-1	Melanoma	M1b	21	0	24.6333	CR	0	0	0	0	0	0	0	0	0	0	0	0	0	0	0	0	0	0	0	0	0	0	0	0	0	0	0	0	0	0	0	Unaltered
Patient133	Male	PD-1	Melanoma	M1c	11.3667	1	12.3333	PD	1	0	0	0	0	0	0	0	0	0	0	0	0	0	0	0	0	0	0	0	0	0	0	0	0	0	0	0	0	0	0	Altered
Patient134	Male	PD-1	Melanoma	M1b	10.9333	1	19.6667	PD	1	0	0	0	0	0	0	1	0	0	0	0	0	0	0	0	0	0	0	0	0	0	0	0	0	0	0	0	0	0	0	Altered
Patient135	Male	PD-1	Melanoma	M1c	12.8	0	20.9333	CR	0	0	0	1	0	0	1	0	0	0	0	0	0	0	0	0	0	0	0	0	0	0	0	0	0	0	0	0	0	0	0	Altered
Patient136	Male	PD-1	Melanoma	M1b	19.0333	0	23.2667	PD	0	0	0	0	0	0	0	0	0	0	0	0	0	0	1	0	0	0	0	0	0	0	0	0	0	0	0	0	0	0	0	Altered
Patient137	Female	PD-1	Melanoma	M1c	28.6	0	25.7333	CR	0	0	0	0	0	0	1	0	0	0	1	0	0	0	0	0	0	0	0	0	0	0	0	0	0	0	0	0	0	0	0	Altered
Patient14	Female	PD-1	Melanoma	M1b	1	1	6.2	PD	0	0	0	0	0	0	0	0	0	0	0	0	0	0	0	0	0	0	0	0	0	0	0	0	0	0	0	0	0	0	0	Unaltered
Patient140	Male	PD-1	Melanoma	M1b	69.2	1	11.7	PD	1	0	0	0	0	0	1	0	0	0	0	0	0	0	1	0	0	0	0	0	0	0	0	0	0	0	0	0	0	0	0	Altered
Patient141	Female	PD-1	Melanoma	M1c	2.03333	0	29.1667	PR	0	0	0	0	0	0	0	0	0	0	0	0	0	0	0	0	0	0	0	0	0	0	0	0	0	0	0	0	0	0	0	Unaltered
Patient142	Female	PD-1	Melanoma	M1a	1.63333	0	33.2	SD	0	0	0	0	0	0	0	0	0	0	0	0	0	0	0	0	0	0	0	0	0	0	0	0	0	0	0	0	0	0	0	Unaltered
Patient143	Male	PD-1	Melanoma	IIIC	11.1	0	21	PD	1	0	0	0	0	1	0	0	1	0	0	0	0	0	0	0	0	0	0	0	0	0	0	0	0	0	0	0	0	0	0	Altered
Patient144	Male	PD-1	Melanoma	M1c	27.4333	0	22.0667	PR	0	0	0	0	0	0	0	0	0	0	0	0	0	0	0	0	0	1	0	0	0	0	0	0	0	0	0	0	0	0	0	Altered
Patient145	Male	PD-1	Melanoma	M1c	9.7	0	27.7667	CR	0	0	0	0	0	0	0	0	0	0	0	0	0	0	0	0	0	0	0	0	0	0	0	0	0	0	0	0	0	0	0	Unaltered
Patient146	Female	PD-1	Melanoma	M1c	12.4	0	20.4	CR	0	0	0	0	1	0	0	0	1	0	0	0	0	0	0	0	0	0	0	0	0	0	0	0	0	0	0	0	0	0	0	Altered
Patient147	Male	PD-1	Melanoma	M1c	18.1	0	32	CR	0	0	0	0	0	0	0	0	0	1	0	0	0	0	0	0	0	0	0	0	0	0	0	0	0	0	0	0	0	0	0	Altered
Patient148	Female	PD-1	Melanoma	M1a	10.8333	0	26.4	PR	0	0	0	0	0	0	0	0	0	0	0	0	0	0	0	0	0	0	0	0	0	0	0	0	0	0	0	0	0	0	0	Unaltered
Patient149	Male	PD-1	Melanoma	M1c	7.33333	1	16.5667	SD	0	0	0	0	0	0	0	0	0	0	0	0	0	0	0	0	0	0	0	0	0	0	0	0	0	0	0	0	0	0	0	Unaltered
Patient15	Female	PD-1	Melanoma	M1c	6	1	4.96667	PR	0	0	0	0	0	0	0	0	0	0	0	0	0	0	0	0	0	0	0	0	0	0	0	0	0	0	0	0	0	0	0	Unaltered
Patient150	Male	PD-1	Melanoma	M1c	0.8	0	22.8333	PR	0	0	0	0	0	0	0	0	0	0	0	0	0	0	0	0	0	0	0	0	0	0	0	0	0	0	0	0	0	0	0	Unaltered
Patient154	Female	PD-1	Melanoma	IIIC	2.36667	0	21.1667	SD	0	0	0	0	0	0	0	0	0	0	0	0	0	0	0	0	0	0	0	0	0	0	0	0	0	0	0	0	0	0	0	Unaltered
Patient155	Male	PD-1	Melanoma	IIIC	8.46667	0	15.8333	PD	0	0	0	0	0	0	0	0	0	0	0	0	0	0	0	0	0	0	0	0	0	0	0	0	0	0	0	0	0	0	0	Unaltered
Patient156	Male	PD-1	Melanoma	M1c	6.73333	1	2.9	PD	0	0	0	0	0	0	0	0	0	0	0	0	0	0	0	0	0	0	0	0	0	0	0	0	0	0	0	0	0	0	0	Unaltered
Patient157	Male	PD-1	Melanoma	M1c	14.6667	0	4.76667	PD	0	0	0	0	0	0	0	0	0	0	0	0	0	0	0	0	0	0	0	0	0	0	0	0	0	0	0	0	0	0	0	Unaltered
Patient158	Male	PD-1	Melanoma	M1c	76.6333	0	6.46667	PR	0	0	0	1	0	0	0	0	1	1	0	0	0	0	0	0	0	0	0	0	1	0	0	0	0	0	0	0	0	0	0	Altered
Patient159	Female	PD-1	Melanoma	M1c	1.63333	0	9.6	SD	0	0	0	0	0	0	0	0	0	0	0	0	0	0	0	0	0	0	0	0	0	0	0	0	0	0	0	0	0	0	0	Unaltered
Patient162	Male	PD-1	Melanoma	M1c	52.2333	1	6.7	PD	0	0	0	0	0	0	1	0	1	1	0	0	0	0	0	0	0	0	1	0	0	0	0	0	0	0	0	0	0	0	0	Altered
Patient163	Male	PD-1	Melanoma	M1c	6.73333	1	5.76667	PD	0	0	0	0	0	0	0	0	0	0	0	0	0	0	0	0	0	0	0	0	0	0	0	0	0	0	0	0	0	0	0	Unaltered
Patient165	Male	PD-1	Melanoma	M1c	21.4667	0	2.5	PD	0	0	0	0	0	0	0	0	0	0	0	0	0	0	0	0	0	0	0	0	0	0	0	0	0	0	0	0	0	0	0	Unaltered
Patient166	Female	PD-1	Melanoma	M1c	0.333333	1	6.83333	PR	0	0	0	0	0	0	0	0	0	0	0	0	0	0	0	0	0	0	0	0	0	0	0	0	0	0	0	0	0	0	0	Unaltered
Patient167	Female	PD-1	Melanoma	M1c	1.4	1	9.4	PD	0	0	0	0	0	0	1	0	0	0	0	0	0	0	0	0	0	0	0	0	0	0	0	0	0	0	0	0	0	0	0	Altered
Patient168	Male	PD-1	Melanoma	M1c	1.06667	0	20.7667	PR	0	0	0	0	0	0	0	0	0	0	0	0	0	0	0	0	0	0	0	0	0	0	0	0	0	0	0	0	0	0	0	Unaltered
Patient169	Male	PD-1	Melanoma	M1c	45.8	0	18.1	PR	0	0	0	0	1	1	1	0	0	0	0	0	0	0	0	0	0	0	0	0	0	0	0	0	0	0	0	0	0	0	0	Altered
Patient17	Male	PD-1	Melanoma	M1c	12.2	1	22.8667	SD	0	0	0	0	0	0	0	0	0	0	0	0	0	0	0	0	0	0	0	0	0	0	0	0	0	0	0	0	0	0	0	Unaltered
Patient170	Male	PD-1	Melanoma	IIIC	1.9	0	11.5667	SD	0	0	1	0	0	0	0	0	0	0	0	0	0	0	0	0	0	0	0	0	0	0	0	0	0	0	0	0	0	0	0	Altered
Patient172	Male	PD-1	Melanoma	IIIC	22.6667	0	9.06667	SD	0	0	0	0	0	0	0	0	0	0	0	1	0	0	0	1	0	0	0	0	0	0	0	0	0	0	0	0	0	0	0	Altered
Patient173	Female	PD-1	Melanoma	M1c	2.4	1	1.4	PD	0	0	0	0	0	0	0	0	0	0	0	0	0	0	0	0	0	0	0	0	0	0	0	0	0	0	0	0	0	0	0	Unaltered
Patient179	Female	PD-1	Melanoma	M1b	15.9333	0	21.7667	PR	0	1	1	0	0	0	0	0	0	0	0	0	0	0	0	0	0	0	0	0	0	0	0	0	0	0	0	0	0	0	0	Altered
Patient18	Male	PD-1	Melanoma	IIIC	11.4	1	4.33333	PD	0	0	0	0	0	0	0	0	0	0	0	0	0	0	0	0	0	0	0	0	0	0	0	0	0	0	0	0	0	0	0	Unaltered
Patient180	Male	PD-1	Melanoma	M1c	19.3667	1	12.6667	SD	0	0	0	0	0	0	1	0	0	0	0	0	0	0	0	0	0	0	0	0	0	0	0	0	0	0	0	0	0	0	0	Altered
Patient181	Female	PD-1	Melanoma	M1c	9.16667	0	15.8667	CR	0	0	0	0	0	0	0	0	1	0	0	0	0	0	0	0	0	0	0	0	0	0	0	0	0	0	0	0	0	0	0	Altered
Patient182	Female	PD-1	Melanoma	M1c	5.73333	1	24.9333	PD	1	0	0	0	0	0	0	0	0	0	0	0	0	0	0	0	0	0	0	0	0	0	0	0	0	0	0	0	0	0	0	Altered
Patient183	Male	PD-1	Melanoma	M1c	10.9	1	19.0667	PD	0	0	0	0	0	0	0	0	0	0	0	0	0	0	0	0	0	0	0	0	0	0	0	0	0	0	0	0	0	0	0	Unaltered
Patient184	Male	PD-1	Melanoma	M1c	66.1	0	17.1	CR	1	0	0	0	0	0	0	0	0	1	1	1	1	1	0	0	0	0	0	0	0	0	0	0	0	0	0	0	0	0	0	Altered
Patient185	Male	PD-1	Melanoma	M1c	5.26667	0	6.76667	SD	0	0	0	0	0	0	0	0	0	0	0	0	0	0	0	0	0	0	0	0	0	0	0	0	0	0	0	0	0	0	0	Unaltered
Patient187	Female	PD-1	Melanoma	M1a	4.43333	0	20.5667	CR	0	0	0	0	0	0	0	0	0	0	0	0	0	0	0	0	0	0	0	0	0	0	0	0	0	0	0	0	0	0	0	Unaltered
Patient188	Male	PD-1	Melanoma	M1a	0.733333	1	2.46667	PD	0	0	0	0	0	0	0	0	0	0	0	0	0	0	0	0	0	0	0	0	0	0	0	0	0	0	0	0	0	0	0	Unaltered
Patient189	Female	PD-1	Melanoma	M1c	1.66667	0	23.9333	PR	0	0	0	0	0	0	0	0	0	0	0	0	0	0	0	0	0	0	0	0	0	0	0	0	0	0	0	0	0	0	0	Unaltered
Patient191	Male	PD-1	Melanoma	M1b	140.633	0	21.9333	PR	0	1	1	1	1	0	1	1	0	0	0	1	0	0	1	0	0	0	0	0	0	0	1	0	0	0	0	0	0	0	0	Altered
Patient192	Female	PD-1	Melanoma	M1c	15.2333	0	9.66667	PR	1	0	0	0	0	0	0	0	0	0	0	0	0	0	0	0	0	0	0	0	0	0	0	0	0	0	0	0	0	0	0	Altered
Patient193	Female	PD-1	Melanoma	IIIC	19.2	0	21.9667	SD	0	0	0	0	0	0	0	1	0	0	0	0	0	0	0	0	1	1	0	0	0	0	0	0	0	0	0	0	0	0	0	Altered
Patient195	Male	PD-1	Melanoma	M1c	65.5	0	29.8333	PR	0	0	0	0	0	0	0	0	0	1	1	0	0	0	0	0	0	0	0	0	0	0	0	0	0	0	0	0	0	0	0	Altered
Patient196	Male	PD-1	Melanoma	M1c	57.7667	1	2.7	PD	1	0	0	0	0	0	1	0	0	0	0	0	0	0	0	0	0	0	0	0	0	0	0	0	1	0	0	0	0	0	0	Altered
Patient197	Female	PD-1	Melanoma	M1c	2	0	32	PR	0	0	0	0	0	0	0	0	0	0	0	0	0	0	0	0	0	0	0	0	0	0	0	0	0	0	0	0	0	0	0	Unaltered
Patient20	Female	PD-1	Melanoma	M1c	13	1	8.06667	PD	0	0	0	0	0	0	0	0	0	0	0	0	0	0	0	0	0	0	0	0	0	0	0	0	0	0	0	0	0	0	0	Unaltered
Patient200	Male	PD-1	Melanoma	M1c	24.3	1	17.0667	PD	0	0	0	0	1	0	1	0	0	1	0	0	0	1	0	0	0	0	0	0	0	0	0	0	0	0	0	0	0	0	0	Altered
Patient201	Male	PD-1	Melanoma	IIIC	2	1	5.56667	PD	0	0	0	0	0	0	0	0	0	0	0	0	0	0	0	0	0	0	0	0	0	0	0	0	0	0	0	0	0	0	0	Unaltered
Patient203	Male	PD-1	Melanoma	M1b	2.36667	1	20.8667	PD	0	0	0	0	0	0	0	0	0	0	0	0	0	0	0	0	0	0	0	0	0	0	0	0	0	0	0	0	0	0	0	Unaltered
Patient204	Male	PD-1	Melanoma	M1a	58.8667	0	27.3	CR	0	0	0	0	0	0	0	0	0	0	0	0	0	0	1	0	0	0	0	0	0	0	0	0	0	0	0	0	0	0	0	Altered
Patient205	Female	PD-1	Melanoma	M1c	18.9	1	13.0667	PD	0	0	0	0	0	0	0	0	0	0	0	0	0	0	0	0	0	0	0	0	0	0	0	1	0	0	0	0	0	0	0	Altered
Patient206	Male	PD-1	Melanoma	M1c	180.3	1	3	PD	0	0	0	1	0	0	0	0	1	1	0	0	0	0	1	0	0	0	0	1	0	0	0	0	0	0	0	0	0	0	0	Altered
Patient21	Female	PD-1	Melanoma	M1c	3.46667	0	30.2	PR	0	1	1	1	0	0	0	0	0	0	0	0	0	0	0	0	0	0	0	0	0	0	0	0	0	0	0	0	0	0	0	Altered
Patient22	Male	PD-1	Melanoma	M1c	1.9	1	8.43333	PD	0	0	0	0	0	0	0	0	0	0	0	0	0	0	0	0	0	0	0	0	0	0	0	0	0	0	0	0	0	0	0	Unaltered
Patient23	Male	PD-1	Melanoma	IIIC	4.36667	0	32.5	PD	0	0	0	0	0	0	0	0	0	0	0	0	0	0	0	0	0	0	0	0	0	0	0	0	0	0	0	0	0	0	0	Unaltered
Patient24	Male	PD-1	Melanoma	M1c	9.23333	1	4.56667	PD	0	0	0	0	0	0	1	0	0	0	0	0	0	0	0	0	0	0	0	0	0	0	0	0	0	0	0	0	0	0	0	Altered
Patient25	Male	PD-1	Melanoma	M1c	10.9	0	36.5333	PR	0	0	0	0	1	0	0	0	0	0	0	0	0	0	0	0	0	0	0	0	0	0	0	0	0	0	0	0	0	0	0	Altered
Patient27	Male	PD-1	Melanoma	M1a	7.33333	1	14.3667	PD	0	0	0	0	0	0	0	0	0	0	0	0	0	0	0	0	0	0	0	0	0	0	0	0	0	0	0	0	0	0	0	Unaltered
Patient30	Female	PD-1	Melanoma	M1c	5.33333	1	7.1	SD	0	0	0	0	0	0	0	0	0	0	0	0	0	0	0	0	0	0	0	0	0	0	0	0	0	0	0	0	0	0	0	Unaltered
Patient31	Male	PD-1	Melanoma	M1c	5.53333	1	14.2	PD	0	0	0	0	0	0	0	0	0	0	0	0	0	0	0	0	0	0	0	0	0	0	0	0	0	0	0	0	0	0	0	Unaltered
Patient32	Female	PD-1	Melanoma	M1c	9.03333	1	1.76667	PD	0	0	1	0	0	0	0	0	0	0	0	0	0	0	0	0	0	0	0	0	0	0	0	0	0	0	0	0	0	0	0	Altered
Patient33	Female	PD-1	Melanoma	M1c	0.3	0	55.9667	PR	1	0	0	0	0	0	0	0	0	0	0	0	0	0	0	0	0	0	0	0	0	0	0	0	0	0	0	0	0	0	0	Altered
Patient34	Male	PD-1	Melanoma	M1b	0.6	0	56.3667	PR	1	0	0	0	0	0	0	0	0	0	0	0	0	0	0	0	0	0	0	0	0	0	0	0	0	0	0	0	0	0	0	Altered
Patient35	Male	PD-1	Melanoma	M1c	1.3	1	32.2667	SD	0	0	0	0	0	0	0	0	0	0	0	0	0	0	0	0	0	0	0	0	0	0	0	0	0	0	0	0	0	0	0	Unaltered
Patient36	Male	PD-1	Melanoma	M1c	6.03333	1	15.0333	PD	0	0	0	0	0	0	0	0	0	1	0	0	0	0	0	0	0	0	0	0	0	0	0	0	0	0	0	0	0	0	0	Altered
Patient37	Male	PD-1	Melanoma	M1c	1.33333	1	9.16667	PD	0	0	0	0	0	1	0	0	0	0	0	0	0	0	0	0	0	0	0	0	0	0	0	0	0	0	0	0	0	0	0	Altered
Patient38	Male	PD-1	Melanoma	M1c	1.26667	1	11.4333	PD	0	0	0	0	0	0	0	0	0	0	0	0	0	0	0	0	0	0	0	0	0	0	0	0	0	0	0	0	0	0	0	Unaltered
Patient39	Male	PD-1	Melanoma	M1a	0.366667	0	31.2333	SD	0	0	0	0	0	0	0	0	0	0	0	0	0	0	0	0	0	0	0	0	0	0	0	0	0	0	0	0	0	0	0	Unaltered
Patient4	Male	PD-1	Melanoma	M1c	12.7667	1	20	CR	0	0	0	0	0	0	0	0	1	0	0	0	0	0	0	0	0	0	0	0	0	0	0	0	0	0	0	0	0	0	0	Altered
Patient40	Female	PD-1	Melanoma	M1c	202.833	1	15.6	PD	1	0	1	1	0	0	0	0	1	1	1	0	1	0	1	0	1	1	1	0	0	0	0	0	0	0	0	0	0	0	0	Altered
Patient41	Male	PD-1	Melanoma	M1b	328.167	0	56.1667	PR	1	0	0	1	1	1	1	1	0	1	0	0	1	0	1	1	0	0	0	0	0	0	0	0	0	1	0	0	0	0	0	Altered
Patient42	Male	PD-1	Melanoma	M1c	16.8667	0	34.2333	CR	0	0	0	0	0	0	1	0	0	0	0	0	0	0	0	0	0	0	0	0	0	0	0	0	0	0	0	0	0	0	0	Altered
Patient43	Male	PD-1	Melanoma	M1c	2.8	0	30.8333	PR	0	0	0	0	0	0	0	0	0	0	0	0	0	0	0	0	0	0	0	0	0	0	0	0	0	0	0	0	0	0	0	Unaltered
Patient44	Male	PD-1	Melanoma	M1c	2.16667	0	30.7333	PR	0	0	0	0	0	0	0	0	0	0	0	0	0	0	0	0	0	0	0	0	0	0	0	0	0	0	0	0	0	0	0	Unaltered
Patient45	Male	PD-1	Melanoma	M1c	9.56667	0	55.5333	PR	0	0	0	0	0	0	0	0	0	0	0	0	0	0	1	0	0	0	0	0	0	0	0	0	0	0	0	0	0	0	0	Altered
Patient46	Male	PD-1	Melanoma	M1c	27.8667	0	29.8667	SD	0	0	0	0	0	0	0	0	0	0	0	0	0	0	0	0	0	0	0	0	0	1	0	0	0	0	0	0	0	0	0	Altered
Patient47	Female	PD-1	Melanoma	M1c	25.2667	0	31.2333	PD	1	0	0	0	0	0	0	0	0	1	0	0	0	0	0	0	0	0	0	0	0	0	0	0	0	0	0	0	0	0	0	Altered
Patient48	Female	PD-1	Melanoma	M1c	0.933333	1	1.76667	PD	0	0	0	0	0	0	0	0	0	0	0	0	0	0	0	0	0	0	0	0	0	0	0	0	0	0	0	0	0	0	0	Unaltered
Patient49	Female	PD-1	Melanoma	M1c	53.8333	0	54.5	PR	0	0	0	0	0	1	0	0	1	1	0	0	1	0	1	1	1	0	0	0	0	0	0	0	0	0	0	0	0	0	0	Altered
Patient50	Female	PD-1	Melanoma	M1c	6.56667	1	5.83333	NA	0	0	0	0	0	0	0	0	0	1	0	0	0	0	0	0	0	0	0	0	0	0	0	0	0	0	0	0	0	0	0	Altered
Patient51	Male	PD-1	Melanoma	M1b	37.7333	0	51.5667	PR	1	0	0	0	0	0	0	0	0	1	0	0	0	0	0	0	0	0	0	0	0	0	0	0	0	0	0	0	0	0	0	Altered
Patient54	Male	PD-1	Melanoma	M1c	9.56667	1	33.9	NA	0	0	0	0	0	0	0	0	0	0	0	0	0	0	0	0	0	0	0	0	0	0	0	0	0	0	0	0	0	0	0	Unaltered
Patient55	Male	PD-1	Melanoma	M1c	15.9667	0	50.1	PR	0	0	0	0	0	0	1	0	0	1	0	1	0	0	0	0	0	0	0	0	0	0	0	0	0	0	1	0	0	0	0	Altered
Patient56	Male	PD-1	Melanoma	M1c	0.566667	1	4.06667	PD	0	0	0	0	0	0	0	0	0	0	0	0	0	0	0	0	0	0	0	0	0	0	0	0	0	0	0	0	0	0	0	Unaltered
Patient58	Male	PD-1	Melanoma	M1c	3.06667	1	10.1	PD	0	0	0	0	0	0	0	0	0	0	0	0	0	0	0	0	0	0	0	0	0	0	0	0	0	0	0	0	0	0	0	Unaltered
Patient59	Male	PD-1	Melanoma	M1c	10.5	1	6.36667	PD	0	0	0	0	0	0	0	0	0	0	0	0	0	0	0	0	0	0	0	0	0	0	0	0	0	0	0	0	0	0	0	Unaltered
Patient6	Female	PD-1	Melanoma	M1b	31	1	22.9	SD	0	0	1	0	0	0	0	0	0	1	0	1	0	0	1	0	0	0	0	0	0	0	0	0	0	0	0	0	0	0	0	Altered
Patient60	Male	PD-1	Melanoma	M1b	13.0333	1	22.0667	SD	0	0	0	0	0	0	0	0	0	0	0	0	0	0	0	0	0	0	0	0	0	0	0	0	0	0	0	0	0	0	0	Unaltered
Patient61	Female	PD-1	Melanoma	M1c	70.4333	0	32.9	SD	0	0	1	0	0	0	0	0	0	0	0	0	0	0	1	0	0	0	0	0	0	0	0	0	0	0	0	0	0	0	0	Altered
Patient62	Female	PD-1	Melanoma	M1c	208.167	0	33.3667	PR	1	0	0	0	1	0	0	0	0	0	0	0	0	0	1	0	0	0	0	1	0	0	0	0	0	0	0	0	0	0	0	Altered
Patient63	Female	PD-1	Melanoma	M1c	2.9	1	5.93333	PD	0	0	0	0	0	0	0	0	0	0	0	0	0	0	0	0	0	0	0	0	0	0	0	0	0	0	0	0	0	0	0	Unaltered
Patient67	Female	PD-1	Melanoma	M1c	2.43333	1	4.53333	PD	0	0	0	0	0	0	0	0	0	0	0	0	0	0	0	0	0	0	0	0	0	0	0	0	0	0	0	0	0	0	0	Unaltered
Patient7	Male	PD-1	Melanoma	M1c	2.53333	1	8.96667	SD	0	0	0	0	0	0	0	0	0	0	0	0	0	0	0	0	0	0	0	0	0	0	0	0	0	0	0	0	0	0	0	Unaltered
Patient72	Male	PD-1	Melanoma	M1a	4.03333	0	13.1667	PD	0	0	0	0	0	0	0	0	0	0	0	0	0	0	0	0	0	0	0	0	0	0	0	0	0	0	0	0	0	0	0	Unaltered
Patient73	Male	PD-1	Melanoma	M1c	3	1	28.2	PD	0	0	0	0	0	0	0	0	0	0	0	0	0	0	0	0	0	0	0	0	0	0	0	0	0	0	0	0	0	0	0	Unaltered
Patient75	Male	PD-1	Melanoma	M1c	24.3333	0	29.7	PR	0	0	0	1	0	0	0	0	0	0	1	0	0	0	0	0	0	0	0	0	0	0	0	0	0	0	0	0	0	0	0	Altered
Patient77	Female	PD-1	Melanoma	M1c	3.03333	1	14.8	PD	0	0	1	0	0	0	0	0	0	0	0	0	0	0	0	0	0	0	0	0	0	0	0	0	0	0	0	0	0	0	0	Altered
Patient78	Female	PD-1	Melanoma	M1b	1.43333	1	11.8667	PD	0	0	0	0	0	0	0	0	0	0	0	0	0	0	0	0	0	0	0	0	0	0	0	0	0	0	0	0	0	0	0	Unaltered
Patient79	Female	PD-1	Melanoma	M1c	6.73333	0	28.3	PD	0	0	0	0	1	0	0	0	0	0	0	0	0	1	0	0	0	0	0	0	0	0	0	0	0	0	0	0	0	0	0	Altered
Patient8	Male	PD-1	Melanoma	M1b	6.36667	1	33.5	SD	0	0	0	0	0	0	1	0	0	0	0	0	0	0	0	0	0	0	0	0	0	0	0	0	0	0	0	0	0	0	0	Altered
Patient80	Male	PD-1	Melanoma	M1b	1.13333	1	16.7333	PD	0	0	0	0	0	0	0	0	0	0	0	0	0	0	0	0	0	0	0	0	0	0	0	0	0	0	0	0	0	0	0	Unaltered
Patient82	Male	PD-1	Melanoma	M1c	49.2667	1	4.36667	PD	1	0	0	0	0	0	0	0	0	0	0	0	0	0	0	0	0	0	0	0	0	0	1	0	0	0	0	0	0	0	0	Altered
Patient83	Male	PD-1	Melanoma	M1c	6.5	1	2.36667	PD	0	0	1	1	0	0	0	0	0	0	0	0	0	0	0	0	0	0	0	0	0	0	0	0	0	0	0	0	0	0	0	Altered
Patient84	Female	PD-1	Melanoma	M1c	1.63333	1	5.46667	PD	0	0	0	0	0	0	0	0	0	0	0	0	0	0	0	0	0	0	0	0	0	0	0	0	0	0	0	0	0	0	0	Unaltered
Patient86	Male	PD-1	Melanoma	M1c	9.23333	0	44.2333	SD	0	0	0	0	0	0	0	0	0	0	0	0	0	0	0	0	0	0	0	0	0	0	0	0	0	0	0	0	0	0	0	Unaltered
Patient87	Female	PD-1	Melanoma	M1c	2.9	0	42.1	PR	0	0	0	0	0	0	0	0	0	0	0	0	0	0	0	0	0	0	0	0	0	0	0	0	0	0	0	0	0	0	0	Unaltered
Patient88	Male	PD-1	Melanoma	M1c	1.23333	1	2.46667	PD	0	0	0	0	0	0	0	0	0	0	0	0	0	0	0	0	0	0	0	0	0	0	0	1	0	0	0	0	0	0	0	Altered
Patient9	Female	PD-1	Melanoma	IIIC	21.8	0	32.1	PD	0	0	0	0	0	0	0	0	0	0	0	0	0	1	0	0	1	0	0	0	0	0	0	0	0	0	0	0	0	0	0	Altered
Patient94	Female	PD-1	Melanoma	M1c	8.9	1	1.33333	PD	0	0	0	0	0	0	0	0	0	0	0	0	0	0	0	0	0	0	0	0	0	0	0	0	0	0	0	0	0	0	0	Unaltered
Patient96	Male	PD-1	Melanoma	M1c	21.4667	0	30.4333	CR	1	0	0	1	0	0	0	0	0	0	0	0	0	0	0	0	0	0	0	0	0	0	0	0	0	0	0	0	0	0	0	Altered
Patient98	Female	PD-1	Melanoma	M1b	10.0667	1	22.7667	PD	0	0	0	0	0	0	0	0	0	0	0	0	0	0	0	0	0	0	0	0	0	0	0	0	0	0	0	0	0	0	0	Unaltered
Patient99	Male	PD-1	Melanoma	M1c	30.2	0	30.7	PR	0	0	1	0	1	0	0	0	0	0	0	0	0	0	0	0	0	0	0	0	0	0	0	0	0	0	0	0	0	0	0	Altered

## Sheet: S5 SKCM_DFCI_2015
Supplementary Table S5. Clinical information of patients in the SKCM DFCI 2015 cohort.
#1: Altered; 0: Unaltered
PATIENT_ID	SEX	AGE	DRUG_TYPE	CANCER_TYPE	M_STAGE	TMB_NONSYNONYMOUS	OS_STATUS	OS_MONTHS	RECIST	BRD7	DPF1	SMARCC1	SMARCA4	ARID2	PBRM1	BRD9	ARID1A	BCL11B	SMARCB1	PHF10	SMARCD2	SMARCD3	DPF2	SMARCC2	SS18	ACTL6A	ARID1B	SMARCA2	ACTL6B	BICRA	BCL11A	BCL7C	ACTB	DPF3	BICRAL	BCL7B	SS18L1	SMARCD1	BCL7A	SMARCE1	SWI/SNF_Alteration(31genes)
Pat02	Female	42	CTLA4	Melanoma	M1c	7.56667	0	54.4	SD	0	0	0	0	0	0	0	0	0	0	0	0	0	0	0	0	0	0	0	0	0	0	0	0	0	0	0	0	0	0	0	Unaltered
Pat03	Female	61	CTLA4	Melanoma	M1c	12.3	1	3.33333	PD	1	1	1	0	0	0	0	0	0	0	0	0	0	0	0	0	0	0	0	0	0	0	0	0	0	0	0	0	0	0	0	Altered
Pat04	Male	71	CTLA4	Melanoma	M1b	10.9333	0	32.9	PR	0	0	0	0	0	0	0	0	0	0	0	0	0	0	0	0	0	0	0	0	0	0	0	0	0	0	0	0	0	0	0	Unaltered
Pat06	Male	33	CTLA4	Melanoma	M1c	5.7	1	5.36667	PD	0	0	0	0	0	0	0	0	0	0	0	0	0	0	0	0	0	0	0	0	0	0	0	0	0	0	0	0	0	0	0	Unaltered
Pat07	Male	36	CTLA4	Melanoma	M0	4.93333	0	35	SD	0	0	0	0	0	0	0	0	0	0	0	0	0	0	0	0	0	0	0	0	0	0	0	0	0	0	0	0	0	0	0	Unaltered
Pat08	Male	73	CTLA4	Melanoma	M1c	8.5	1	4.66667	PD	0	0	0	1	0	0	0	0	0	0	0	0	0	0	0	0	0	0	0	0	0	0	0	0	0	0	0	0	0	0	0	Altered
Pat100	Male	70	CTLA4	Melanoma	M1c	16.8667	1	12	PD	0	0	0	0	1	0	0	0	0	0	0	0	0	0	0	0	0	0	0	0	0	0	0	0	0	0	0	0	0	0	0	Altered
Pat101	Male	75	CTLA4	Melanoma	M1c	1.66667	1	9.6	PD	0	0	0	0	0	0	0	0	0	0	0	0	0	0	0	0	0	0	0	0	0	0	0	0	0	0	0	0	0	0	0	Unaltered
Pat103	Male	70	CTLA4	Melanoma	M1c	20.5333	1	34.9333	PR	0	0	0	0	1	1	0	0	0	0	0	0	0	0	0	0	0	0	0	0	0	0	0	0	0	0	0	0	0	0	0	Altered
Pat104	Female	45	CTLA4	Melanoma	M1c	1.13333	1	7.9	SD	0	0	0	0	0	0	0	0	0	0	0	0	0	0	0	0	0	0	0	0	0	0	0	0	0	0	0	0	0	0	0	Unaltered
Pat105	Male	41	CTLA4	Melanoma	M0	4.06667	0	34.9	PR	0	0	0	0	0	0	0	0	0	0	0	0	0	0	0	0	0	0	0	0	0	0	0	0	0	0	0	0	0	0	0	Unaltered
Pat106	Female	43	CTLA4	Melanoma	M1b	0.966667	1	8.33333	PD	0	0	0	0	0	0	1	0	0	0	0	0	0	0	0	0	0	0	0	0	0	0	0	0	0	0	0	0	0	0	0	Altered
Pat109	Male	69	CTLA4	Melanoma	M1b	9.2	1	2.76667	PD	0	0	0	0	1	0	0	0	0	0	0	0	0	0	0	0	0	0	0	0	0	0	0	0	0	0	0	0	0	0	0	Altered
Pat11	Male	67	CTLA4	Melanoma	M1c	64.5333	0	26.3333	PD	0	0	0	0	0	0	0	1	0	0	0	0	1	0	0	0	0	0	0	0	0	0	0	0	0	0	0	0	0	0	0	Altered
Pat110	Male	76	CTLA4	Melanoma	M1b	205.933	1	10.6667	PD	0	0	0	1	0	0	1	1	1	1	1	0	0	0	0	0	0	0	0	0	0	0	0	0	0	0	0	0	0	0	0	Altered
Pat113	Male	68	CTLA4	Melanoma	M1c	10.5	1	10.0333	PR	0	0	0	0	0	0	0	0	0	0	0	0	0	0	0	0	0	0	0	0	0	0	0	0	0	0	0	0	0	0	0	Unaltered
Pat115	Male	45	CTLA4	Melanoma	M1c	2.4	1	4.83333	PD	0	0	0	0	1	0	0	0	0	0	0	0	0	0	0	0	0	0	0	0	0	0	0	0	0	0	0	0	0	0	0	Altered
Pat117	Male	73	CTLA4	Melanoma	M1c	22.5667	0	30.4667	PR	0	0	0	0	1	0	0	0	0	0	0	0	0	0	0	0	0	0	0	0	0	0	0	0	0	0	0	0	0	0	0	Altered
Pat118	Female	43	CTLA4	Melanoma	M1c	3.66667	1	10.4333	PD	0	0	0	0	0	1	0	0	0	0	0	0	0	0	0	0	0	0	0	0	0	0	0	0	0	0	0	0	0	0	0	Altered
Pat119	Male	61	CTLA4	Melanoma	M0	9.6	0	26.9333	PD	0	0	0	0	0	0	0	0	0	0	0	1	0	0	0	0	0	0	0	0	0	0	0	0	0	0	0	0	0	0	0	Altered
Pat121	Male	46	CTLA4	Melanoma	M1c	2.1	1	4.06667	PD	0	0	0	0	0	0	0	0	0	0	0	0	0	0	0	0	0	0	0	0	0	0	0	0	0	0	0	0	0	0	0	Unaltered
Pat123	Female	50	CTLA4	Melanoma	M1c	15.7	1	28.4333	SD	0	0	0	0	0	0	0	0	0	0	0	0	0	0	0	0	0	0	0	0	0	0	0	0	0	0	0	0	0	0	0	Unaltered
Pat124	Male	78	CTLA4	Melanoma	M1b	14.0667	1	4.86667	PD	0	0	0	0	0	0	0	0	0	0	0	0	0	0	0	0	0	0	0	0	0	0	0	0	0	0	0	0	0	0	0	Unaltered
Pat126	Male	77	CTLA4	Melanoma	M1b	12.8667	0	21.3667	PR	0	0	0	0	0	0	0	0	0	0	0	0	0	0	0	0	0	0	0	0	0	0	0	0	0	0	0	0	0	0	0	Unaltered
Pat127	Female	25	CTLA4	Melanoma	M1c	3.6	1	11.0667	PD	0	0	0	0	0	0	0	0	0	0	0	0	0	0	0	0	0	0	0	0	0	0	0	0	0	0	0	0	0	0	0	Unaltered
Pat128	Male	29	CTLA4	Melanoma	M1c	2.5	1	3.76667	PD	0	0	0	0	0	0	0	0	0	0	0	0	0	0	0	0	0	0	0	0	0	0	0	0	0	0	0	0	0	0	0	Unaltered
Pat129	Male	18	CTLA4	Melanoma	M1b	3.53333	0	17.9667	PD	0	0	0	0	0	0	0	0	0	0	0	0	0	0	0	0	0	0	0	0	0	0	0	0	0	0	0	0	0	0	0	Unaltered
Pat13	Male	78	CTLA4	Melanoma	M0	3.56667	1	24.4	PD	0	0	0	0	0	0	0	0	0	0	0	0	0	0	0	0	0	0	0	0	0	0	0	0	0	0	0	0	0	0	0	Unaltered
Pat130	Male	76	CTLA4	Melanoma	M1c	6.5	1	1.5	PD	0	0	0	0	0	0	0	0	0	0	0	0	0	0	0	0	0	0	0	0	0	0	0	0	0	0	0	0	0	0	0	Unaltered
Pat131	Male	32	CTLA4	Melanoma	M1c	3.33333	1	8.56667	SD	0	0	0	0	0	0	0	0	0	0	0	0	0	0	0	0	0	0	0	0	0	0	0	0	0	0	0	0	0	0	0	Unaltered
Pat132	Male	81	CTLA4	Melanoma	M1c	61.4333	0	22.5333	PR	0	0	0	0	1	0	0	0	0	0	0	0	0	1	1	1	1	1	1	0	0	0	0	0	0	0	0	0	0	0	0	Altered
Pat133	Male	76	CTLA4	Melanoma	M1b	7.46667	1	18.0667	PD	0	0	0	0	0	0	0	1	0	0	0	0	0	0	0	0	0	0	0	0	0	0	0	0	0	0	0	0	0	0	0	Altered
Pat135	Female	29	CTLA4	Melanoma	M1c	7.8	1	2.7	PD	0	0	0	0	0	0	0	0	0	0	0	0	0	0	0	0	0	0	0	0	0	0	0	0	0	0	0	0	0	0	0	Unaltered
Pat138	Female	39	CTLA4	Melanoma	M1c	167.6	1	49.2667	SD	1	1	0	0	1	1	0	1	1	0	1	0	0	0	1	0	1	1	0	0	0	0	0	0	0	0	0	0	0	0	0	Altered
Pat139	Male	58	CTLA4	Melanoma	M1c	46.5	1	3.3	PD	0	0	0	1	1	0	0	0	0	0	0	0	0	0	1	0	0	1	0	1	0	0	0	0	0	0	0	0	0	0	0	Altered
Pat14	Female	48	CTLA4	Melanoma	M1c	1.43333	1	5.43333	PD	0	0	0	0	0	0	0	0	0	0	0	0	0	0	0	0	0	0	0	0	0	0	0	0	0	0	0	0	0	0	0	Unaltered
Pat140	Male	62	CTLA4	Melanoma	M1c	10.5667	1	16.4	PD	0	0	0	0	0	0	0	0	0	0	0	0	0	0	0	0	0	0	0	0	0	0	0	0	0	0	0	0	0	0	0	Unaltered
Pat143	Male	71	CTLA4	Melanoma	M1c	28.9667	1	5.1	PD	0	0	0	0	0	0	0	0	1	0	0	0	0	0	0	0	0	0	0	0	1	1	0	0	0	0	0	0	0	0	0	Altered
Pat147	Male	63	CTLA4	Melanoma	M1a	17.8667	1	7.46667	PD	0	0	0	0	0	0	0	0	0	0	0	0	0	0	0	0	0	0	0	0	0	0	0	0	0	0	0	0	0	0	0	Unaltered
Pat148	Female	35	CTLA4	Melanoma	M1c	7.43333	1	2.8	PD	0	0	0	0	0	0	0	0	0	0	0	0	0	0	0	0	0	0	0	0	0	0	0	0	0	0	0	0	0	0	0	Unaltered
Pat15	Male	32	CTLA4	Melanoma	M1c	7.96667	1	1.66667	PD	0	0	0	0	0	0	0	0	0	0	0	0	0	0	0	0	0	0	1	0	0	0	0	0	0	0	0	0	0	0	0	Altered
Pat151	Male	68	CTLA4	Melanoma	M1c	57.3	1	6.8	PD	0	0	0	0	1	1	0	0	0	0	0	0	0	0	0	0	0	0	0	0	0	0	0	0	0	0	0	0	0	0	0	Altered
Pat157	Female	69	CTLA4	Melanoma	M1c	4.3	1	2.86667	X	0	0	0	0	0	0	0	0	0	0	0	0	0	0	0	0	0	0	0	0	0	0	0	0	0	0	0	0	0	0	0	Unaltered
Pat159	Male	51	CTLA4	Melanoma	M1b	15.4333	0	28.0667	PD	0	0	0	0	0	0	0	0	0	0	0	0	0	1	1	0	0	0	0	0	0	0	1	1	0	0	0	0	0	0	0	Altered
Pat16	Female	68	CTLA4	Melanoma	M1b	61.6	1	27.0333	PD	0	0	0	1	0	0	0	0	0	0	0	0	0	0	0	0	0	0	0	0	0	0	0	0	1	1	0	0	0	0	0	Altered
Pat160	Male	79	CTLA4	Melanoma	M1c	1.7	1	5.06667	PD	0	0	0	0	0	0	0	0	0	0	0	0	0	0	0	0	0	0	0	0	0	0	0	0	0	0	0	0	0	0	0	Unaltered
Pat162	Female	55	CTLA4	Melanoma	M1c	1.73333	1	7.03333	PD	0	0	0	0	0	0	0	0	0	0	0	0	0	0	0	0	0	0	0	0	0	0	0	0	0	0	0	0	0	0	0	Unaltered
Pat163	Male	54	CTLA4	Melanoma	M1c	3.13333	0	24.9667	PD	0	0	0	0	0	0	0	0	0	0	0	0	0	0	0	0	0	0	0	0	0	0	0	0	0	0	0	0	0	0	0	Unaltered
Pat165	Female	50	CTLA4	Melanoma	M1c	2.3	1	3.83333	PD	0	0	0	0	0	0	0	0	0	0	0	0	0	0	0	0	0	0	0	0	0	0	0	0	0	0	0	0	0	0	0	Unaltered
Pat166	Male	31	CTLA4	Melanoma	M1c	1.83333	1	2.56667	X	0	0	0	0	0	0	0	0	0	0	0	0	0	0	0	0	0	0	0	0	0	0	0	0	0	0	0	0	0	0	0	Unaltered
Pat167	Male	50	CTLA4	Melanoma	M1c	1.1	1	13.6	PD	0	0	0	0	0	0	0	0	0	0	0	0	0	0	0	0	0	0	0	0	0	0	0	0	0	0	0	0	0	0	0	Unaltered
Pat168	Male	68	CTLA4	Melanoma	M1c	8.1	1	2.23333	X	0	0	0	0	0	0	0	0	0	0	0	0	0	0	0	0	0	0	0	0	0	0	0	0	0	0	0	0	0	0	0	Unaltered
Pat17	Male	44	CTLA4	Melanoma	M1c	7.16667	1	6.83333	PD	0	0	0	0	0	0	0	0	0	0	0	0	0	0	0	0	0	0	0	0	0	0	0	0	0	0	0	0	0	0	0	Unaltered
Pat170	Male	48	CTLA4	Melanoma	M1c	7.6	1	3.6	PD	0	0	0	0	0	0	0	0	0	0	0	0	0	0	0	0	0	0	0	0	0	0	0	0	0	0	0	0	0	0	0	Unaltered
Pat171	Male	66	CTLA4	Melanoma	M1a	3.23333	1	15.5333	PD	0	0	0	0	0	0	0	0	0	0	0	0	0	0	0	0	0	0	0	0	0	0	0	0	0	0	0	0	0	0	0	Unaltered
Pat174	Female	57	CTLA4	Melanoma	M1a	21.8333	0	22.9333	PR	0	0	0	0	1	0	0	0	0	0	0	0	0	0	0	0	0	1	0	0	0	0	0	0	0	0	0	0	0	0	0	Altered
Pat175	Female	67	CTLA4	Melanoma	M1a	2.9	1	3	X	0	0	0	0	0	0	0	0	0	0	0	0	0	0	0	0	0	0	0	0	0	0	0	0	0	0	0	0	0	0	0	Unaltered
Pat18	Female	55	CTLA4	Melanoma	M0	1.06667	0	26.6	PD	0	0	0	0	0	0	0	0	0	0	0	0	0	0	0	0	0	0	0	0	0	0	0	0	0	0	0	0	0	0	0	Unaltered
Pat19	Male	59	CTLA4	Melanoma	M1c	15.2333	1	5.83333	PD	0	0	0	1	0	0	0	0	0	0	0	0	0	0	0	0	0	0	0	0	0	0	0	0	0	0	0	0	0	0	0	Altered
Pat21	Male	81	CTLA4	Melanoma	M1c	44.9333	1	22.5333	SD	0	0	0	0	0	0	0	0	0	0	0	1	0	0	0	0	0	1	1	0	0	1	0	0	1	0	0	0	0	0	0	Altered
Pat24	Female	74	CTLA4	Melanoma	M1b	1.1	0	32.3667	PR	0	0	0	0	0	0	0	0	0	0	0	0	0	0	0	0	0	0	0	0	0	0	0	0	0	0	0	0	0	0	0	Unaltered
Pat25	Male	69	CTLA4	Melanoma	M1c	1.63333	1	10.8333	PD	0	0	0	0	0	0	0	0	0	0	0	0	0	0	0	0	0	0	0	0	0	0	0	0	0	0	0	0	0	0	0	Unaltered
Pat27	Male	61	CTLA4	Melanoma	M1c	1	0	45.9667	PD	0	0	0	0	0	0	0	0	0	0	0	0	0	0	0	0	0	0	0	0	0	0	0	0	0	0	0	0	0	0	0	Unaltered
Pat28	Male	77	CTLA4	Melanoma	M1c	24.6667	1	39.4667	PD	0	0	1	1	0	0	0	0	0	0	0	0	0	0	1	0	0	0	0	0	0	0	0	0	0	0	1	0	0	0	0	Altered
Pat29	Male	82	CTLA4	Melanoma	M1c	1.16667	0	44.2	X	0	0	0	0	0	0	0	0	0	0	0	0	0	0	0	0	0	0	1	0	0	0	0	0	0	0	0	0	0	0	0	Altered
Pat32	Male	72	CTLA4	Melanoma	M1c	23.3667	1	4.9	PD	0	0	0	0	0	0	0	0	0	0	0	0	0	0	0	0	0	0	0	0	0	0	0	0	0	0	0	0	0	0	0	Unaltered
Pat33	Male	65	CTLA4	Melanoma	M1c	0.433333	1	7.03333	PD	0	0	0	0	0	0	0	0	0	0	0	0	0	0	0	0	0	0	0	0	0	0	0	0	0	0	0	0	0	0	0	Unaltered
Pat36	Female	52	CTLA4	Melanoma	M1c	0.366667	1	1.8	PD	0	0	0	0	0	0	0	0	0	0	0	0	0	0	0	0	0	0	0	0	0	0	0	0	0	0	0	0	0	0	0	Unaltered
Pat37	Female	47	CTLA4	Melanoma	M1c	3.4	1	2.33333	PD	0	0	0	0	0	0	0	1	0	0	0	0	0	0	0	0	0	0	0	0	0	0	0	0	0	0	0	0	0	0	0	Altered
Pat38	Male	45	CTLA4	Melanoma	M1c	78.4667	0	51.3	PR	0	0	0	0	0	1	0	1	0	0	0	0	0	0	0	0	0	0	0	0	0	0	1	0	0	1	1	0	0	0	0	Altered
Pat39	Male	67	CTLA4	Melanoma	M1b	2.43333	0	49.5667	CR	0	0	0	0	0	0	0	0	0	0	0	0	0	0	0	0	0	1	0	0	0	0	0	0	0	0	0	0	0	0	0	Altered
Pat40	Male	74	CTLA4	Melanoma	M1c	3.5	1	1.13333	PD	0	0	0	0	0	0	0	0	0	0	0	0	0	0	0	0	0	0	0	0	0	0	0	0	0	0	0	0	0	0	0	Unaltered
Pat41	Male	64	CTLA4	Melanoma	M1c	11.3	1	4.26667	PD	0	0	0	0	0	0	0	0	0	0	0	0	0	0	0	0	0	0	0	0	0	0	0	0	0	0	0	0	0	0	0	Unaltered
Pat43	Female	75	CTLA4	Melanoma	M1b	5.46667	1	1.23333	PD	0	0	0	0	0	0	0	0	0	0	0	0	0	0	0	0	0	0	0	0	0	0	0	0	0	0	0	0	0	0	0	Unaltered
Pat44	Female	57	CTLA4	Melanoma	M1c	1.03333	1	9.03333	PD	0	0	0	0	0	0	0	0	0	0	0	0	0	0	0	0	0	0	0	0	0	0	0	0	0	0	0	0	0	0	0	Unaltered
Pat45	Male	68	CTLA4	Melanoma	M1c	30.2333	1	2.96667	PD	0	0	0	0	0	0	0	0	0	0	0	0	0	0	0	0	0	0	0	0	0	0	0	0	0	0	0	0	0	0	0	Unaltered
Pat46	Female	36	CTLA4	Melanoma	M1b	7.83333	1	5.33333	PD	0	0	0	0	0	0	0	1	0	0	0	0	0	0	0	0	0	0	0	0	0	0	0	0	0	0	0	0	0	0	0	Altered
Pat47	Male	78	CTLA4	Melanoma	M1c	4.5	0	36.8667	CR	0	0	0	0	0	0	0	0	0	0	0	0	0	0	0	0	0	0	0	0	0	0	0	0	0	0	0	0	0	0	0	Unaltered
Pat49	Male	36	CTLA4	Melanoma	M1c	21.8333	0	34.4667	SD	0	0	0	0	0	0	0	0	0	0	0	0	0	0	0	0	0	0	0	0	0	0	0	0	0	0	0	0	0	0	0	Unaltered
Pat50	Male	77	CTLA4	Melanoma	M1c	14.5	1	2.16667	PD	0	0	0	0	0	0	0	0	0	0	0	0	0	0	0	0	0	0	0	0	0	0	0	0	0	0	0	0	0	0	0	Unaltered
Pat54	Male	73	CTLA4	Melanoma	M1c	28	1	6.93333	PD	0	0	0	0	0	0	0	0	0	0	0	0	0	0	0	0	0	0	0	0	0	0	0	0	0	1	0	0	0	0	0	Altered
Pat55	Female	71	CTLA4	Melanoma	M1c	15.8	1	6.43333	PD	0	0	0	0	0	0	0	0	0	0	0	0	0	0	0	0	0	0	0	0	0	0	0	0	0	0	0	0	0	0	0	Unaltered
Pat56	Male	68	CTLA4	Melanoma	M1c	1.43333	1	7.83333	PD	0	0	0	0	0	0	0	0	0	0	0	0	0	0	0	0	0	0	0	0	0	0	0	0	0	0	0	0	0	0	0	Unaltered
Pat57	Male	69	CTLA4	Melanoma	M0	1.83333	1	8.33333	PD	0	0	0	0	0	0	0	0	0	0	0	0	0	0	0	0	0	0	0	0	0	0	0	0	0	0	0	0	0	0	0	Unaltered
Pat58	Female	59	CTLA4	Melanoma	M0	63.2667	1	21.7333	PD	0	0	0	0	1	0	1	1	0	0	1	0	1	1	1	0	0	0	0	0	0	0	0	0	0	0	0	0	0	0	0	Altered
Pat59	Male	36	CTLA4	Melanoma	M1b	8.8	1	7.46667	PD	0	0	0	0	0	0	0	0	0	0	0	0	0	0	0	0	0	0	0	0	0	0	0	0	0	0	0	0	0	0	0	Unaltered
Pat60	Male	86	CTLA4	Melanoma	M1c	24.2333	1	9.06667	PD	0	0	0	0	0	0	0	0	0	0	0	0	0	0	0	0	0	0	0	0	0	0	0	0	0	0	0	0	0	0	0	Unaltered
Pat62	Male	76	CTLA4	Melanoma	M1c	45.1	1	20.0667	PD	0	0	0	0	0	0	0	1	0	0	0	0	0	0	0	0	0	0	0	0	0	0	0	0	0	0	0	0	0	0	0	Altered
Pat63	Male	65	CTLA4	Melanoma	M0	6.93333	0	34.6333	CR	0	0	0	0	0	0	0	0	0	0	0	0	0	0	0	0	0	0	0	0	0	0	0	0	0	0	0	0	0	0	0	Unaltered
Pat64	Male	83	CTLA4	Melanoma	M1c	21.4667	1	3.53333	PD	0	0	0	0	0	0	0	1	0	0	0	0	0	0	0	0	0	0	0	0	0	0	0	0	0	0	0	0	0	0	0	Altered
Pat66	Female	44	CTLA4	Melanoma	M0	10.7333	0	21.7667	SD	0	0	0	0	1	0	0	0	0	0	0	0	0	0	0	0	0	0	0	0	0	0	0	0	0	0	0	1	0	0	0	Altered
Pat67	Male	39	CTLA4	Melanoma	M1c	0.866667	1	2.63333	PD	0	0	0	0	0	0	0	0	0	0	0	0	0	0	0	0	0	0	0	0	0	0	0	0	0	0	0	0	0	0	0	Unaltered
Pat70	Male	38	CTLA4	Melanoma	M1c	2.53333	1	17.7333	PD	0	0	0	0	0	0	0	0	0	0	0	0	0	0	0	0	0	0	0	0	0	0	0	0	0	0	0	0	0	0	0	Unaltered
Pat71	Male	63	CTLA4	Melanoma	M1c	23.5333	1	4.56667	PD	0	0	0	0	0	0	0	0	0	0	0	0	0	0	1	0	0	0	0	0	0	0	0	0	0	0	0	0	0	0	0	Altered
Pat73	Male	71	CTLA4	Melanoma	M1c	7.86667	1	14.7333	PR	0	0	0	0	0	0	0	0	0	0	0	0	0	0	0	0	0	0	0	0	0	0	0	0	0	0	0	0	0	0	0	Unaltered
Pat74	Male	73	CTLA4	Melanoma	M1c	16.6333	1	6.43333	PD	0	0	0	0	0	0	0	0	0	0	0	0	0	0	0	0	0	1	0	0	0	0	0	0	0	0	0	0	0	0	0	Altered
Pat76	Male	74	CTLA4	Melanoma	M1c	6.4	1	4.63333	PD	0	0	0	0	0	0	0	0	1	0	0	0	0	0	0	0	0	0	0	0	0	0	0	0	0	0	0	0	0	0	0	Altered
Pat77	Male	21	CTLA4	Melanoma	M0	12.1	0	34.3	PR	0	0	0	0	0	0	0	0	0	0	0	0	0	0	1	0	0	0	0	0	0	0	0	0	0	0	0	0	0	0	0	Altered
Pat78	Female	71	CTLA4	Melanoma	M1c	5.1	1	1.26667	PD	0	0	0	0	1	0	0	0	0	0	0	0	0	0	0	0	0	0	0	0	0	0	0	0	0	1	0	0	0	0	0	Altered
Pat79	Male	69	CTLA4	Melanoma	M1b	10.5	1	26.7	PR	0	0	0	0	0	0	0	0	0	0	0	0	0	0	0	0	0	0	0	0	0	1	0	1	0	0	0	0	0	0	0	Altered
Pat80	Male	48	CTLA4	Melanoma	M1c	6.3	1	24.1333	SD	0	0	0	0	0	0	0	0	0	0	0	0	0	0	0	0	0	0	0	0	0	0	0	0	0	0	0	0	0	0	0	Unaltered
Pat81	Female	54	CTLA4	Melanoma	M1a	3.66667	1	20.9333	PD	0	0	0	0	0	0	0	0	0	0	0	0	0	0	0	0	0	0	0	0	0	0	0	0	0	0	0	0	0	0	0	Unaltered
Pat82	Female	54	CTLA4	Melanoma	M1c	13.2333	1	3.46667	PD	0	0	0	0	0	0	0	0	0	0	0	0	0	0	0	0	0	0	0	0	0	0	0	0	0	0	0	0	0	0	0	Unaltered
Pat83	Male	22	CTLA4	Melanoma	M1c	1.23333	0	34.2333	PD	0	0	0	0	0	0	0	0	0	0	0	0	0	0	0	0	0	0	0	0	0	0	0	0	0	0	0	0	0	0	0	Unaltered
Pat85	Male	83	CTLA4	Melanoma	M1c	13.4333	1	15.2667	PD	0	0	0	0	0	0	0	0	0	0	0	0	0	0	0	0	0	0	0	0	0	0	0	0	0	0	0	0	0	0	0	Unaltered
Pat86	Male	55	CTLA4	Melanoma	M1a	2	1	9.76667	SD	0	0	0	0	0	0	0	0	0	0	0	0	0	0	0	0	0	0	0	0	0	0	0	0	0	0	0	0	0	0	0	Unaltered
Pat88	Female	60	CTLA4	Melanoma	M1c	51.9333	0	32.9667	SD	0	0	0	0	0	1	0	0	0	0	0	0	0	0	0	0	0	0	0	0	0	0	0	0	0	0	0	0	1	0	0	Altered
Pat90	Male	59	CTLA4	Melanoma	M1c	6.73333	0	33.5	PR	0	0	0	0	0	0	0	0	0	0	0	0	0	0	0	0	0	0	0	0	0	0	0	0	0	0	0	0	0	0	0	Unaltered
Pat92	Male	49	CTLA4	Melanoma	M1c	1.26667	1	4.1	PD	0	0	0	0	0	0	0	0	0	0	0	0	0	0	0	0	0	0	0	0	0	0	0	0	0	0	0	0	0	0	0	Unaltered
Pat98	Female	57	CTLA4	Melanoma	M1c	1.1	1	4.66667	PD	0	0	0	0	0	0	0	0	0	0	0	0	0	0	0	0	0	0	0	0	0	0	0	0	0	0	0	0	0	0	0	Unaltered

## Sheet: S6 ccRCC_DFCI_2020
Supplementary Table S6. Clinical information of patients in the ccRCC DFCI 2020 cohort.
#1: Altered; 0: Unaltered
PATIENT_ID	SEX	AGE	DRUG_TYPE	CANCER_TYPE	Total_mutation	OS_STATUS	OS_MONTHS	BENEFIT	PBRM1#	SMARCB1	SMARCA4	BICRA	BCL11A	SMARCC2	DPF3	SMARCA2	DPF2	BCL7A	BRD7	ARID1A	ARID1B	BRD9	ARID2	BCL11B	SMARCD2	ACTL6A	SMARCD3	BCL7C	DPF1	SMARCC1	SS18L1	PHF10	BCL7B	BICRAL	ACTB	ACTL6B	SMARCD1	SMARCE1	SS18	SWI/SNF_Alteration(31genes)
RP-1458_RCCBMS-00097-T_v4_Exome_OnPrem	Female	67	PD-1	Clear cell renal cell carcinoma	45	1	36.526	DCB	1	0	0	0	0	0	0	0	0	0	0	0	0	0	0	0	0	0	0	0	0	0	0	0	0	0	0	0	0	0	0	Altered
RP-1458_RCCBMS-00141-T_v1_Exome_OnPrem	Female	62	PD-1	Clear cell renal cell carcinoma	23	0	68.5479	DCB	0	0	0	0	0	0	0	0	0	0	0	0	0	0	0	0	0	0	0	0	0	0	0	0	0	0	0	0	0	0	0	Unaltered
RP-1458_RCCBMS-00146-T_v1_Exome_OnPrem	Female	65	PD-1	Clear cell renal cell carcinoma	44	1	50.5973	DCB	1	0	0	0	0	0	0	0	0	0	0	0	0	0	0	0	0	0	0	0	0	0	0	0	0	0	0	0	0	0	0	Altered
RP-1458_RCCBMS-00163-T_v1_Exome_OnPrem	Male	76	PD-1	Clear cell renal cell carcinoma	48	0	63.9781	DCB	1	0	0	0	0	0	0	0	0	0	0	0	0	0	0	0	0	0	0	0	0	0	0	0	0	0	0	0	0	0	0	Altered
RP-1458_RCCBMS-00052-T_v1_Exome_OnPrem	Female	59	PD-1	Clear cell renal cell carcinoma	49	1	13.5452	DCB	0	0	0	0	0	0	0	0	0	0	0	0	0	0	0	0	0	0	0	0	0	0	0	0	0	0	0	0	0	0	0	Unaltered
RP-1458_RCCBMS-00094-T_v1_Exome_OnPrem	Male	61	PD-1	Clear cell renal cell carcinoma	43	1	30.5753	DCB	0	0	0	0	0	0	0	0	0	0	0	0	0	0	0	0	0	0	0	0	0	0	0	0	0	0	0	0	0	0	0	Unaltered
RP-1458_RCCBMS-00136-T_v1_Exome_OnPrem	Male	64	PD-1	Clear cell renal cell carcinoma	242	1	35.5726	DCB	1	0	0	0	0	0	0	0	0	1	0	0	0	0	0	0	0	0	0	0	0	0	0	0	0	0	0	0	0	0	0	Altered
RP-1458_RCCBMS-00108-T_v2_Exome_OnPrem	Male	65	PD-1	Clear cell renal cell carcinoma	76	1	32.0219	NCB	0	0	0	0	0	0	0	0	0	0	0	0	0	0	0	0	0	0	0	0	0	0	0	0	0	0	0	0	0	0	0	Unaltered
RP-1458_RCCBMS-00147-T_v1_Exome_OnPrem	Male	57	PD-1	Clear cell renal cell carcinoma	44	1	1.9726	NCB	0	0	0	0	0	0	0	0	0	0	0	0	0	0	0	0	0	0	0	0	0	0	0	0	0	0	0	0	0	0	0	Unaltered
RP-1458_RCCBMS-00044-T_v2_Exome_OnPrem	Female	56	PD-1	Clear cell renal cell carcinoma	20	1	4.53699	NCB	1	0	0	0	0	0	0	0	0	0	0	0	0	0	0	0	0	0	0	0	0	0	0	0	0	0	0	0	0	0	0	Altered
RP-1458_RCCBMS-00084-T_v2_Exome_OnPrem	Female	60	PD-1	Clear cell renal cell carcinoma	31	1	56.7123	NCB	0	0	0	0	0	0	0	0	0	0	0	0	0	0	0	0	0	0	0	0	0	0	0	0	0	0	0	0	0	0	0	Unaltered
RP-1458_RCCBMS-00093-T_v2_Exome_OnPrem	Male	46	PD-1	Clear cell renal cell carcinoma	4	1	5.12877	NCB	0	0	0	0	0	0	0	0	0	0	0	0	0	0	0	0	0	0	0	0	0	0	0	0	0	0	0	0	0	0	0	Unaltered
RP-1458_RCCBMS-00153-T_v4_Exome_OnPrem	Male	71	PD-1	Clear cell renal cell carcinoma	58	1	17.8849	DCB	0	0	0	0	0	0	0	0	0	0	0	0	0	0	0	0	0	0	0	0	0	0	0	0	0	0	0	0	0	0	0	Unaltered
RP-1458_RCCBMS-00154-T_v4_Exome_OnPrem	Male	66	PD-1	Clear cell renal cell carcinoma	42	1	46.2575	DCB	1	0	0	0	0	0	0	0	0	0	0	0	0	0	0	0	0	0	0	0	0	0	0	0	0	0	0	0	0	0	0	Altered
RP-1458_RCCBMS-00028-T_v4_Exome_OnPrem	Female	51	PD-1	Clear cell renal cell carcinoma	127	1	18.5753	DCB	0	0	0	0	0	0	0	0	0	0	0	0	0	0	0	0	0	0	0	0	0	0	0	0	0	0	0	0	0	0	0	Unaltered
RP-1458_RCCBMS-00037-T_v4_Exome_OnPrem	Male	60	PD-1	Clear cell renal cell carcinoma	67	1	2.26849	DCB	1	0	0	0	0	0	0	0	0	0	0	0	0	0	0	0	0	0	0	0	0	0	0	0	0	0	0	0	0	0	0	Altered
RP-1458_RCCBMS-00054-T_v4_Exome_OnPrem	Male	59	PD-1	Clear cell renal cell carcinoma	36	1	20.2849	DCB	0	0	0	0	0	0	0	0	0	0	0	0	0	0	0	0	0	0	0	0	0	0	0	0	0	0	0	0	0	0	0	Unaltered
RP-1458_RCCBMS-00074-T_v4_Exome_OnPrem	Female	59	PD-1	Clear cell renal cell carcinoma	50	1	24.9205	DCB	0	0	0	0	0	0	0	0	1	0	0	0	0	0	0	0	0	0	0	0	0	0	0	0	0	0	0	0	0	0	0	Altered
RP-1458_RCCBMS-00178-T_v2_Exome_OnPrem	Male	55	PD-1	Clear cell renal cell carcinoma	25	1	8.21918	DCB	0	0	0	0	0	0	0	0	0	0	0	0	0	0	0	0	0	0	0	0	0	0	0	0	0	0	0	0	0	0	0	Unaltered
RP-1458_RCCBMS-00068-T_v2_Exome_OnPrem	Female	60	PD-1	Clear cell renal cell carcinoma	21	1	4.17534	NCB	1	0	0	0	0	0	0	0	0	0	0	0	0	0	0	0	0	0	0	0	0	0	0	0	0	0	0	0	0	0	0	Altered
RP-1458_RCCBMS-00035-T_v2_Exome_OnPrem	Male	67	PD-1	Clear cell renal cell carcinoma	4	1	2.9589	NCB	0	0	0	0	0	0	0	0	0	0	0	0	0	0	0	0	0	0	0	0	0	0	0	0	0	0	0	0	0	0	0	Unaltered
RP-1458_RCCBMS-00005-T_v2_Exome_OnPrem	Male	46	PD-1	Clear cell renal cell carcinoma	20	1	16.7342	DCB	0	0	0	0	0	0	0	0	0	0	0	0	0	0	0	0	0	0	0	0	0	0	0	0	0	0	0	0	0	0	0	Unaltered
RP-1458_RCCBMS-00009-T_v2_Exome_OnPrem	Male	47	PD-1	Clear cell renal cell carcinoma	23	0	72.0658	DCB	0	0	0	0	0	0	0	0	0	0	0	0	0	0	0	0	0	0	0	0	0	0	0	0	0	0	0	0	0	0	0	Unaltered
RP-1458_RCCBMS-00114-T_v1_Exome_OnPrem	Male	61	PD-1	Clear cell renal cell carcinoma	52	1	15.8795	DCB	0	0	0	0	0	0	0	0	0	0	0	0	0	0	0	0	0	0	0	0	0	0	0	0	0	0	0	0	0	0	0	Unaltered
RP-1458_RCCBMS-00119-T_v2_Exome_OnPrem	Male	70	PD-1	Clear cell renal cell carcinoma	45	1	1.11781	NCB	1	0	0	0	0	0	0	0	0	0	0	0	0	0	0	0	0	0	0	0	0	0	0	0	0	0	0	0	0	0	0	Altered
RP-1458_RCCBMS-00125-T_v2_Exome_OnPrem	Female	59	PD-1	Clear cell renal cell carcinoma	34	0	69.9945	NCB	1	0	0	0	0	0	0	0	0	0	0	0	0	0	0	0	0	0	0	0	0	0	0	0	0	0	0	0	0	0	0	Altered
RP-1458_RCCBMS-00092-T_v2_Exome_OnPrem	Male	50	PD-1	Clear cell renal cell carcinoma	24	1	25.3151	NCB	0	0	0	0	0	0	0	0	0	0	0	0	0	0	0	0	0	0	0	0	0	0	0	0	0	0	0	0	0	0	0	Unaltered
RP-1458_RCCBMS-00011-T_v2_Exome_OnPrem	Female	51	PD-1	Clear cell renal cell carcinoma	28	0	68.9096	DCB	0	0	0	0	0	0	0	0	0	0	0	0	0	0	0	0	0	0	0	0	0	0	0	0	0	0	0	0	0	0	0	Unaltered
RP-1458_RCCBMS-00090-T_v4_Exome_OnPrem	Male	50	PD-1	Clear cell renal cell carcinoma	47	1	22.7178	DCB	0	0	0	0	0	0	0	0	0	0	0	0	0	0	0	0	0	0	0	0	0	0	0	0	0	0	0	0	0	0	0	Unaltered
RP-1458_RCCBMS-00076-T_v4_Exome_OnPrem	Male	54	PD-1	Clear cell renal cell carcinoma	58	1	28.2082	DCB	0	0	0	0	0	0	0	0	0	0	0	0	0	0	0	0	0	0	0	0	0	0	0	0	0	0	0	0	0	0	0	Unaltered
RP-1458_RCCBMS-00098-T_v4_Exome_OnPrem	Female	69	PD-1	Clear cell renal cell carcinoma	46	1	39.1562	DCB	0	0	0	0	0	0	0	0	0	0	0	0	0	0	0	0	0	0	0	0	0	0	0	0	0	0	0	0	0	0	0	Unaltered
RP-1458_RCCBMS-00103-T_v2_Exome_OnPrem	Male	63	PD-1	Clear cell renal cell carcinoma	63	0	13.2164	DCB	1	0	0	0	0	0	0	0	0	0	0	0	0	0	0	0	0	0	0	0	0	0	0	0	0	0	0	0	0	0	0	Altered
RP-1458_RCCBMS-00137-T_v2_Exome_OnPrem	Male	60	PD-1	Clear cell renal cell carcinoma	36	1	22.8493	DCB	0	0	0	0	0	0	0	0	0	0	0	0	0	0	0	0	0	0	0	0	0	0	0	0	0	0	0	0	0	0	0	Unaltered
RP-1458_RCCBMS-00150-T_v1_Exome_OnPrem	Male	74	PD-1	Clear cell renal cell carcinoma	58	1	7.95616	NCB	0	0	0	0	0	0	0	0	0	0	0	0	0	0	0	0	0	0	0	0	0	0	0	0	0	0	0	0	0	0	0	Unaltered
RP-1458_RCCBMS-00169-T_v1_Exome_OnPrem	Female	70	PD-1	Clear cell renal cell carcinoma	73	0	61.8411	DCB	1	0	0	0	0	0	0	0	0	0	0	0	0	0	0	0	0	0	0	0	0	0	0	0	0	0	0	0	0	0	0	Altered
RP-1458_RCCBMS-00049-T_v1_Exome_OnPrem	Male	77	PD-1	Clear cell renal cell carcinoma	30	1	5.2274	DCB	0	0	0	0	0	0	0	0	0	0	0	0	0	0	0	0	0	0	0	0	0	0	0	0	0	0	0	0	0	0	0	Unaltered
RP-1458_RCCBMS-00025-T_v1_Exome_OnPrem	Male	69	PD-1	Clear cell renal cell carcinoma	99	1	31.2658	DCB	1	0	0	0	0	0	0	0	0	0	0	0	0	0	0	0	0	0	0	0	0	0	0	0	0	0	0	0	0	0	0	Altered
EA700069	Female	78	PD-1	Clear cell renal cell carcinoma	72	1	5.65092	DCB	0	0	0	0	0	0	0	0	0	0	0	0	0	0	0	0	0	0	0	0	0	0	0	0	0	0	0	0	0	0	0	Unaltered
EA700515	Male	61	PD-1	Clear cell renal cell carcinoma	51	1	23.9507	NCB	0	0	0	0	0	0	0	0	0	0	0	0	0	0	0	0	0	0	0	0	0	0	0	0	0	0	0	0	0	0	0	Unaltered
EA700375	Female	64	PD-1	Clear cell renal cell carcinoma	56	1	20.5667	DCB	0	0	0	0	0	0	0	0	0	0	0	0	0	0	0	0	0	0	0	0	0	0	0	0	0	0	0	0	0	0	0	Unaltered
EA698450	Female	37	PD-1	Clear cell renal cell carcinoma	18	1	10.8747	NCB	0	0	0	0	0	0	0	0	0	0	0	0	0	0	0	0	0	0	0	0	0	0	0	0	0	0	0	0	0	0	0	Unaltered
EA698449	Female	66	PD-1	Clear cell renal cell carcinoma	105	1	20.271	NCB	0	0	0	0	0	0	0	0	0	0	0	0	0	0	0	0	0	0	0	0	0	0	0	0	0	0	0	0	0	0	0	Unaltered
EA699821	Female	78	PD-1	Clear cell renal cell carcinoma	84	1	16.46	NCB	0	0	0	0	0	0	0	0	0	0	0	0	0	0	0	0	0	0	0	0	0	0	0	0	0	0	0	0	0	0	0	Unaltered
EA700348	Male	62	PD-1	Clear cell renal cell carcinoma	59	1	50.037	DCB	1	0	0	0	0	0	0	0	0	0	0	0	0	0	0	0	0	0	0	0	0	0	0	1	0	0	0	0	0	0	0	Altered
EA699629	Male	48	PD-1	Clear cell renal cell carcinoma	48	1	2.56263	NCB	0	0	0	0	0	0	0	0	0	0	0	0	0	0	1	0	0	0	0	0	0	0	0	0	0	0	0	0	0	0	0	Altered
EA700265	Female	53	PD-1	Clear cell renal cell carcinoma	17	1	15.3758	NCB	0	0	0	0	0	0	0	0	0	0	0	0	0	0	0	0	0	0	0	0	0	0	0	0	0	0	0	0	0	0	0	Unaltered
EA699836	Male	64	PD-1	Clear cell renal cell carcinoma	72	0	63.3429	DCB	0	0	0	0	0	0	0	0	0	0	0	0	0	0	0	0	0	0	0	0	0	0	0	0	0	0	0	0	0	0	0	Unaltered
EA699650	Male	64	PD-1	Clear cell renal cell carcinoma	81	1	20.5339	NCB	0	0	0	0	0	0	0	0	0	0	0	0	0	0	0	0	0	0	0	0	0	0	0	0	0	0	0	0	0	0	0	Unaltered
EA699977	Male	56	PD-1	Clear cell renal cell carcinoma	83	1	11.729	DCB	0	0	0	0	0	0	0	0	0	0	0	0	0	0	0	0	0	0	0	0	0	0	0	0	0	0	0	0	0	0	0	Unaltered
EA699624	Male	59	PD-1	Clear cell renal cell carcinoma	54	1	38.5708	DCB	0	0	0	0	0	0	0	0	0	0	0	0	0	0	0	0	0	0	0	0	0	0	0	0	0	0	0	0	0	0	0	Unaltered
EA700251	Male	51	PD-1	Clear cell renal cell carcinoma	78	1	38.768	DCB	0	0	0	0	0	0	0	0	0	0	0	0	0	0	0	0	0	0	0	0	0	0	0	0	0	0	0	0	0	0	0	Unaltered
EA700463	Male	43	PD-1	Clear cell renal cell carcinoma	59	0	57.1006	DCB	0	0	0	0	0	0	0	0	0	0	0	0	0	0	0	0	0	0	0	0	0	0	0	0	0	0	0	0	0	0	0	Unaltered
EA699825	Female	NA	PD-1	Clear cell renal cell carcinoma	134	1	27.8932	DCB	1	0	0	0	0	0	0	0	0	0	0	1	0	0	0	0	0	0	0	0	0	0	0	0	0	0	0	0	0	0	0	Altered
EA698339	Male	NA	PD-1	Clear cell renal cell carcinoma	25	1	6.6037	DCB	0	0	0	0	0	0	0	0	0	0	0	0	0	0	0	0	0	0	0	0	0	0	0	0	0	0	0	0	0	0	0	Unaltered
EA700460	Male	64	PD-1	Clear cell renal cell carcinoma	69	1	19.7782	DCB	0	0	0	0	0	0	0	0	0	0	0	0	1	0	0	0	0	0	0	0	0	0	0	0	0	0	0	0	0	0	0	Altered
EA700245	Female	59	PD-1	Clear cell renal cell carcinoma	80	0	61.1745	NCB	1	0	0	0	0	0	0	0	0	0	0	0	0	0	0	0	0	0	0	0	0	0	0	0	0	0	0	0	0	0	0	Altered
EA698458	Female	NA	PD-1	Clear cell renal cell carcinoma	36	1	34.3326	DCB	0	0	0	0	0	0	0	0	0	0	0	0	0	0	0	0	0	0	0	0	0	0	0	0	0	0	0	0	0	0	0	Unaltered
EA699902	Male	54	PD-1	Clear cell renal cell carcinoma	44	1	12.7146	NCB	0	0	0	0	0	0	0	0	0	0	0	0	0	0	0	0	0	0	0	0	0	0	0	0	0	0	0	0	0	0	0	Unaltered
EA699640	Male	60	PD-1	Clear cell renal cell carcinoma	49	1	28.0575	DCB	0	0	0	0	0	0	0	0	0	0	0	0	0	0	0	0	0	0	0	0	0	0	0	0	0	0	0	0	0	0	0	Unaltered
EA700290	Male	NA	PD-1	Clear cell renal cell carcinoma	134	1	21.3881	NCB	0	0	0	1	0	0	0	0	0	0	0	0	0	0	0	0	0	0	0	0	0	0	0	0	0	0	0	0	0	0	0	Altered
EA699721	Female	NA	PD-1	Clear cell renal cell carcinoma	63	0	65.9055	DCB	0	0	0	0	0	0	0	0	0	0	0	0	0	0	0	0	0	0	0	0	0	0	0	0	0	0	0	0	0	0	0	Unaltered
EA700340	Male	61	PD-1	Clear cell renal cell carcinoma	66	0	62.2259	DCB	1	0	0	0	0	0	0	0	0	0	0	0	0	0	0	0	0	0	0	0	0	0	0	0	0	0	0	0	0	0	0	Altered
EA698477	Male	75	PD-1	Clear cell renal cell carcinoma	118	0	47.2115	NCB	0	0	0	0	0	0	0	0	0	0	0	0	0	1	0	0	0	0	0	0	0	0	0	0	0	0	0	0	0	0	0	Altered
EA700199	Male	48	PD-1	Clear cell renal cell carcinoma	39	0	3.67967	DCB	0	0	0	0	0	0	0	0	0	0	0	0	0	0	0	0	0	0	0	0	0	0	0	0	0	0	0	0	0	0	0	Unaltered
EA699731	Male	52	PD-1	Clear cell renal cell carcinoma	55	1	10.152	NCB	0	0	0	0	0	0	0	0	0	0	0	0	0	0	0	0	0	0	0	0	0	0	0	0	0	0	0	0	0	0	0	Unaltered
EA700606	Male	60	PD-1	Clear cell renal cell carcinoma	43	1	28.2546	DCB	0	0	0	0	0	0	0	0	0	0	0	0	0	0	0	0	0	0	0	0	0	0	0	0	0	0	0	0	0	0	0	Unaltered
EA699806	Male	73	PD-1	Clear cell renal cell carcinoma	138	1	16.7228	DCB	1	0	0	0	0	0	0	0	0	0	0	0	0	0	0	0	0	0	0	0	0	0	0	0	0	0	0	0	0	0	0	Altered
EA700001	Male	66	PD-1	Clear cell renal cell carcinoma	100	0	51.2197	DCB	1	0	0	0	0	0	0	0	0	0	0	0	0	0	0	0	0	0	0	0	1	0	0	0	0	0	0	0	0	0	0	Altered
EA698882	Male	69	PD-1	Clear cell renal cell carcinoma	41	1	2.46407	DCB	0	0	0	0	0	0	0	0	0	0	0	0	0	0	0	0	0	0	0	0	0	0	0	0	0	0	0	0	0	0	0	Unaltered
EA700073	Male	56	PD-1	Clear cell renal cell carcinoma	38	1	47.1786	DCB	1	0	0	0	0	0	0	0	0	0	0	0	0	0	0	0	0	0	0	0	0	0	0	0	0	0	0	0	0	0	0	Altered
EA700349	Male	45	PD-1	Clear cell renal cell carcinoma	75	1	23.2279	NCB	0	0	0	0	0	0	0	0	0	0	0	0	0	0	0	0	1	0	0	0	0	0	0	0	0	0	0	0	0	0	0	Altered
EA698332	Male	56	PD-1	Clear cell renal cell carcinoma	114	1	24.1807	DCB	0	0	0	0	0	0	0	0	0	0	0	0	0	0	0	0	0	0	0	0	0	0	0	0	0	0	0	0	0	0	0	Unaltered
EA700084	Male	85	PD-1	Clear cell renal cell carcinoma	88	1	20.3696	DCB	1	0	0	0	0	0	0	0	0	0	0	0	0	0	0	0	0	0	0	0	0	0	0	0	0	0	0	0	0	0	0	Altered
EA699745	Male	57	PD-1	Clear cell renal cell carcinoma	29	1	22.4394	DCB	0	0	0	0	0	0	0	0	0	0	0	0	0	0	0	0	0	0	0	0	0	0	0	0	0	0	0	0	0	0	0	Unaltered
EA699979	Male	53	PD-1	Clear cell renal cell carcinoma	26	1	22.8665	DCB	0	0	0	0	0	0	0	0	0	0	0	0	0	0	0	0	0	0	0	0	0	0	0	0	0	0	0	0	0	0	0	Unaltered
EA699824	Male	64	PD-1	Clear cell renal cell carcinoma	53	1	21.7495	NCB	0	0	0	0	0	0	0	0	0	0	0	0	0	0	0	0	0	1	1	0	0	0	0	0	0	0	0	0	0	0	0	Altered
EA699975	Male	53	PD-1	Clear cell renal cell carcinoma	54	0	55.885	DCB	1	0	0	0	0	0	0	0	0	0	0	0	0	0	0	0	0	0	0	0	0	0	0	0	0	0	0	0	0	0	0	Altered
EA698471	Male	66	PD-1	Clear cell renal cell carcinoma	56	1	5.0924	DCB	0	0	0	0	0	0	0	0	0	0	0	0	0	0	0	0	0	0	0	0	0	0	0	0	0	0	0	0	0	0	0	Unaltered
EA700176	Male	53	PD-1	Clear cell renal cell carcinoma	41	0	51.1869	DCB	0	0	0	0	0	0	0	0	0	0	0	0	0	0	0	0	0	0	0	0	0	0	0	0	0	0	0	0	0	0	0	Unaltered
EA699893	Female	60	PD-1	Clear cell renal cell carcinoma	34	1	25.6263	DCB	0	0	0	0	0	0	0	0	0	0	0	0	0	0	0	0	0	0	0	0	0	0	0	0	0	0	0	0	0	0	0	Unaltered
EA700376	Male	47	PD-1	Clear cell renal cell carcinoma	83	1	30.3244	DCB	0	0	0	0	0	0	0	0	0	0	0	0	0	0	0	0	0	0	0	0	0	0	0	0	0	0	0	0	0	0	0	Unaltered
EA699818	Female	63	PD-1	Clear cell renal cell carcinoma	61	1	27.8275	DCB	0	0	0	0	0	0	0	0	0	0	0	0	0	0	0	0	0	0	0	0	0	0	0	0	0	0	0	0	0	0	0	Unaltered
EA700000	Male	62	PD-1	Clear cell renal cell carcinoma	49	0	0.952772	DCB	1	0	0	1	0	0	0	0	0	0	0	0	0	0	0	0	0	0	0	0	0	0	0	0	0	0	0	0	0	0	0	Altered
EA698485	Female	75	PD-1	Clear cell renal cell carcinoma	64	0	63.2115	DCB	0	0	0	0	0	0	0	0	0	0	0	0	0	0	0	0	0	0	0	0	0	0	0	0	0	0	0	0	0	0	0	Unaltered
EA700520	Male	NA	PD-1	Clear cell renal cell carcinoma	88	1	0.887064	DCB	0	0	0	0	0	0	0	0	0	0	0	0	0	0	0	0	0	0	0	0	0	0	0	0	0	0	0	0	0	0	0	Unaltered
EA700089	Male	63	PD-1	Clear cell renal cell carcinoma	107	1	6.04517	DCB	1	0	0	0	1	0	0	0	0	0	0	0	0	0	0	0	0	0	0	0	0	0	0	0	0	0	0	0	0	0	0	Altered
EA699827	Male	43	PD-1	Clear cell renal cell carcinoma	21	0	54.308	NCB	0	0	0	0	0	0	0	0	0	0	0	0	0	0	0	0	0	0	0	0	0	0	0	0	0	0	0	0	0	0	0	Unaltered
EA700536	Male	53	PD-1	Clear cell renal cell carcinoma	96	1	23.1951	DCB	1	0	0	0	0	0	0	0	0	0	0	0	0	0	0	0	0	0	0	0	0	0	0	0	0	0	0	0	0	0	0	Altered
EA700094	Male	31	PD-1	Clear cell renal cell carcinoma	147	1	21.9138	NCB	0	0	0	0	0	1	0	0	0	0	0	0	0	0	0	0	0	0	0	0	0	0	0	0	0	0	0	0	0	0	0	Altered
EA700261	Male	36	PD-1	Clear cell renal cell carcinoma	130	1	10.4476	DCB	0	0	0	0	0	0	0	0	0	0	0	0	0	0	0	0	0	0	0	0	0	0	0	0	0	0	0	0	0	0	0	Unaltered
EA698893	Female	52	PD-1	Clear cell renal cell carcinoma	40	1	12.4517	NCB	0	0	0	0	0	0	0	0	0	0	0	0	0	0	0	0	0	0	0	0	0	0	0	0	0	0	0	0	0	0	0	Unaltered
EA700537	Female	71	PD-1	Clear cell renal cell carcinoma	66	1	20.8953	NCB	0	0	0	0	0	0	0	0	0	0	0	1	0	0	0	0	0	0	0	0	0	0	0	0	0	0	0	0	0	0	0	Altered
EA700367	Male	29	PD-1	Clear cell renal cell carcinoma	40	0	59.0062	DCB	0	0	0	0	0	0	0	0	0	0	0	0	0	0	0	0	0	0	0	0	0	0	0	0	0	0	0	0	0	0	0	Unaltered
EA700202	Male	38	PD-1	Clear cell renal cell carcinoma	37	1	40.0164	NCB	0	0	0	0	0	0	0	0	0	0	0	0	0	0	0	0	0	0	0	0	0	0	0	0	0	0	0	0	0	0	0	Unaltered
EA698887	Female	48	PD-1	Clear cell renal cell carcinoma	61	1	20.4025	DCB	0	0	0	0	0	0	0	0	0	0	0	0	0	0	0	0	0	0	0	0	0	0	0	0	0	0	0	0	0	0	0	Unaltered
EA699914	Male	45	PD-1	Clear cell renal cell carcinoma	43	1	31.1786	NCB	0	0	0	0	0	0	0	0	0	0	0	0	0	0	0	0	0	0	0	0	0	0	0	0	0	0	0	0	0	0	0	Unaltered
EA700529	Male	64	PD-1	Clear cell renal cell carcinoma	82	0	50.8583	DCB	1	0	0	0	0	0	0	0	0	0	0	0	0	0	0	0	0	0	0	0	0	0	0	0	0	0	0	0	0	0	0	Altered
EA699911	Female	88	PD-1	Clear cell renal cell carcinoma	109	0	63.2772	DCB	1	0	0	0	0	0	0	0	0	0	0	0	0	0	0	0	0	0	0	0	0	0	0	0	0	0	0	0	0	0	0	Altered
EA698366	Male	43	PD-1	Clear cell renal cell carcinoma	51	1	5.25667	NCB	0	0	0	0	0	0	0	0	0	0	0	1	0	0	0	0	0	0	0	0	0	0	0	0	0	0	0	0	0	0	0	Altered
EA700177	Male	64	PD-1	Clear cell renal cell carcinoma	59	1	12.7474	NCB	1	0	0	0	0	0	0	0	0	0	0	0	0	0	0	0	0	0	0	0	0	0	0	0	0	0	0	0	0	0	0	Altered
EA700252	Male	83	PD-1	Clear cell renal cell carcinoma	155	1	47.7043	DCB	0	0	0	1	0	0	0	0	0	0	0	0	0	0	0	0	0	0	0	0	0	0	0	0	0	0	0	0	0	0	0	Altered
EA699978	Male	48	PD-1	Clear cell renal cell carcinoma	38	1	36.961	DCB	0	0	0	0	0	0	0	0	0	0	0	0	0	0	0	0	0	0	0	0	0	0	0	0	0	0	0	0	0	0	0	Unaltered
EA700547	Male	54	PD-1	Clear cell renal cell carcinoma	67	1	9.72485	NCB	0	0	0	0	0	0	0	1	0	0	0	0	0	0	0	0	0	0	0	0	0	0	0	0	0	0	0	0	0	0	0	Altered
EA699993	Female	69	PD-1	Clear cell renal cell carcinoma	61	0	34.2669	NCB	0	0	0	0	0	0	0	0	0	0	0	0	0	0	0	0	0	0	0	0	0	0	0	0	0	0	0	0	0	0	0	Unaltered
EA700378	Female	59	PD-1	Clear cell renal cell carcinoma	49	0	36.6653	NCB	0	0	0	0	0	0	0	0	0	0	0	0	0	0	0	0	0	0	0	0	0	0	0	0	0	0	0	0	0	0	0	Unaltered
EA700100	Male	65	PD-1	Clear cell renal cell carcinoma	61	1	25.9877	DCB	1	0	0	0	0	0	0	0	0	0	0	0	0	0	0	0	0	0	0	0	0	0	0	0	0	0	0	0	0	0	0	Altered
EA698489	Male	55	PD-1	Clear cell renal cell carcinoma	55	0	50.8583	NCB	1	0	0	0	0	0	0	0	0	0	0	0	0	0	0	0	0	0	0	0	0	0	0	0	0	0	0	0	0	0	0	Altered
EA700338	Female	61	PD-1	Clear cell renal cell carcinoma	67	1	3.31828	NCB	1	0	0	0	0	0	0	0	0	0	0	0	0	0	0	0	0	0	0	0	0	0	0	0	0	0	0	0	0	0	0	Altered
EA700248	Male	55	PD-1	Clear cell renal cell carcinoma	52	1	18.2998	NCB	0	0	0	0	0	0	0	0	0	0	0	0	0	0	0	0	0	0	0	0	0	0	0	0	0	0	0	0	0	0	0	Unaltered
EA699804	Male	68	PD-1	Clear cell renal cell carcinoma	73	1	9.23203	NCB	0	0	0	0	0	0	0	0	0	0	0	0	0	0	0	0	0	0	0	0	0	0	0	0	0	0	0	0	0	0	0	Unaltered
EA700019	Female	50	PD-1	Clear cell renal cell carcinoma	57	1	19.8768	DCB	1	0	0	0	0	0	0	0	0	0	0	0	0	0	0	0	0	0	0	0	0	0	0	0	0	0	0	0	0	0	0	Altered
EA700448	Female	52	PD-1	Clear cell renal cell carcinoma	41	0	40.3121	DCB	1	0	0	0	0	0	0	0	0	0	0	0	0	0	0	0	0	0	0	0	0	0	0	0	0	0	0	0	0	0	0	Altered
EA700191	Female	74	PD-1	Clear cell renal cell carcinoma	54	1	18.5298	DCB	0	0	0	0	0	0	0	0	0	0	0	0	0	0	0	0	0	0	0	0	0	0	0	0	0	0	0	0	0	0	0	Unaltered
EA700434	Female	64	PD-1	Clear cell renal cell carcinoma	69	0	53.2238	DCB	1	0	0	0	0	0	0	0	0	0	0	0	0	0	0	0	0	0	0	0	0	0	0	0	0	0	0	0	0	0	0	Altered
EA700011	Male	45	PD-1	Clear cell renal cell carcinoma	52	1	24.7721	NCB	0	0	0	0	0	0	0	0	0	0	0	0	0	0	0	0	0	0	0	0	0	0	0	0	0	0	0	0	0	0	0	Unaltered
EA700610	Female	66	PD-1	Clear cell renal cell carcinoma	73	1	43.3347	NCB	0	0	0	0	0	0	0	0	0	0	0	0	0	0	0	0	0	0	0	0	0	0	0	0	0	0	0	0	0	0	0	Unaltered
EA700647	Male	82	PD-1	Clear cell renal cell carcinoma	56	1	1.77413	NCB	0	0	0	0	0	0	0	0	0	0	0	0	0	0	0	0	0	0	0	0	0	0	0	0	0	0	0	0	0	0	0	Unaltered
EA700002	Female	60	PD-1	Clear cell renal cell carcinoma	49	1	13.963	DCB	0	0	0	0	0	0	0	0	0	0	0	0	0	0	0	0	0	0	0	0	0	0	0	0	0	0	0	0	0	0	0	Unaltered
EA700542	Male	77	PD-1	Clear cell renal cell carcinoma	94	1	13.1745	DCB	1	0	0	0	0	0	0	0	0	0	0	0	0	0	0	0	0	0	0	0	0	0	0	0	0	0	0	0	0	0	0	Altered
EA700070	Male	46	PD-1	Clear cell renal cell carcinoma	62	0	12.4846	NCB	1	0	0	1	0	0	0	0	0	0	0	0	0	0	0	0	0	0	0	0	0	0	0	0	0	0	0	0	0	0	0	Altered
EA698371	Male	58	PD-1	Clear cell renal cell carcinoma	31	1	22.1109	DCB	0	0	0	0	0	0	0	0	0	0	0	0	0	0	0	0	0	0	0	0	0	0	0	0	0	0	0	0	0	0	0	Unaltered
EA699803	Male	63	PD-1	Clear cell renal cell carcinoma	67	0	53.4209	DCB	1	0	0	0	0	0	0	0	0	0	0	0	0	0	0	0	0	0	0	0	0	0	0	0	0	0	0	0	0	0	0	Altered
EA700266	Male	44	PD-1	Clear cell renal cell carcinoma	77	1	27.6961	DCB	1	0	0	0	0	0	0	0	0	0	0	0	0	0	0	0	0	0	0	0	0	0	0	0	0	0	0	0	0	0	0	Altered
EA700074	Male	75	PD-1	Clear cell renal cell carcinoma	64	1	9.42916	DCB	0	0	0	0	0	0	0	0	0	0	0	0	0	0	1	0	0	0	0	0	0	0	0	0	0	0	0	0	0	0	0	Altered
EA698880	Male	56	PD-1	Clear cell renal cell carcinoma	54	1	12.0903	NCB	0	0	0	0	0	0	0	0	0	0	0	0	0	0	0	0	0	0	0	0	0	0	0	0	0	0	0	0	0	0	0	Unaltered
EA699892	Male	58	PD-1	Clear cell renal cell carcinoma	39	1	34.5298	DCB	0	0	0	0	0	0	0	0	0	0	0	0	0	0	0	0	0	0	0	0	0	0	0	0	0	0	0	0	0	0	0	Unaltered
EA700519	Male	56	PD-1	Clear cell renal cell carcinoma	146	1	7.65503	NCB	0	0	0	0	0	0	0	0	0	0	0	0	0	0	0	0	0	0	0	0	0	0	0	0	0	0	0	0	0	0	0	Unaltered
EA700609	Male	85	PD-1	Clear cell renal cell carcinoma	57	1	10.2177	DCB	1	0	0	0	0	0	0	0	0	0	0	0	0	0	0	0	0	0	0	0	0	0	0	0	0	0	0	0	0	0	0	Altered
EA700649	Male	52	PD-1	Clear cell renal cell carcinoma	53	0	58.9076	DCB	1	0	0	0	0	0	0	0	0	0	0	0	0	0	0	0	0	0	0	0	0	0	0	0	0	0	0	0	0	0	0	Altered
EA700615	Male	51	PD-1	Clear cell renal cell carcinoma	19	1	10.6448	NCB	1	0	0	0	0	0	0	0	0	0	0	0	0	0	0	0	0	0	0	0	0	0	0	0	0	0	0	0	0	0	0	Altered
EA700646	Male	66	PD-1	Clear cell renal cell carcinoma	28	1	17.1499	DCB	0	0	0	0	0	0	0	0	0	0	0	0	0	0	0	0	0	0	0	0	0	0	0	0	0	0	0	0	0	0	0	Unaltered
EA700525	Male	74	PD-1	Clear cell renal cell carcinoma	75	1	8.70637	NCB	1	0	0	0	0	0	0	0	0	0	0	0	0	0	0	0	0	0	0	0	0	0	0	0	0	0	0	0	0	0	0	Altered
EA699653	Male	60	PD-1	Clear cell renal cell carcinoma	78	0	53.0267	DCB	1	0	0	0	0	0	0	0	0	0	0	0	0	0	0	0	0	0	0	0	0	0	0	0	0	0	0	0	0	0	0	Altered
EA699916	Male	65	PD-1	Clear cell renal cell carcinoma	42	0	50.5955	DCB	0	0	0	0	0	0	0	0	0	0	0	0	0	0	0	0	0	0	0	0	0	0	0	0	0	0	0	0	0	0	0	Unaltered
EA698486	Male	65	PD-1	Clear cell renal cell carcinoma	52	1	18.2341	DCB	0	0	0	0	0	0	0	0	0	0	0	0	0	0	0	0	0	0	0	0	0	0	0	0	0	0	0	0	0	0	0	Unaltered
EA700442	Male	48	PD-1	Clear cell renal cell carcinoma	47	1	8.6078	NCB	0	0	0	0	0	0	0	0	0	0	0	0	0	0	0	0	0	0	0	0	0	0	0	0	0	0	0	0	0	0	0	Unaltered
EA700344	Male	59	PD-1	Clear cell renal cell carcinoma	47	0	53.9795	NCB	0	0	0	0	0	0	0	0	0	0	0	0	0	0	0	0	0	0	0	0	0	0	0	0	0	0	0	0	0	0	0	Unaltered
EA699974	Male	68	PD-1	Clear cell renal cell carcinoma	56	1	14.423	DCB	0	0	0	0	0	0	0	0	0	0	0	0	0	0	0	0	0	0	0	0	0	0	0	0	0	0	0	0	0	0	0	Unaltered
EA699901	Male	64	PD-1	Clear cell renal cell carcinoma	41	1	7.06366	NCB	0	0	0	0	0	0	0	0	0	0	0	0	0	0	0	0	0	0	0	0	0	0	0	0	0	0	0	0	0	0	0	Unaltered
EA698908	Male	65	PD-1	Clear cell renal cell carcinoma	131	1	44.0575	DCB	0	0	0	0	0	0	0	0	0	0	0	0	0	0	0	0	0	0	0	0	0	0	0	0	0	0	0	0	0	0	0	Unaltered
EA698348	Female	62	PD-1	Clear cell renal cell carcinoma	82	1	9.52772	DCB	0	0	0	1	0	0	0	0	0	0	0	0	0	0	0	0	0	0	0	0	0	0	0	0	0	0	0	0	0	0	0	Altered
EA700614	Male	80	PD-1	Clear cell renal cell carcinoma	177	1	38.8008	NCB	0	0	0	0	0	0	0	0	0	0	0	0	0	0	0	0	0	0	0	0	0	0	0	0	0	0	0	0	0	0	0	Unaltered
EA699652	Female	30	PD-1	Clear cell renal cell carcinoma	53	1	20.6982	DCB	0	0	0	0	0	0	0	0	0	0	0	0	0	0	0	0	0	0	0	0	0	0	0	0	0	0	0	0	0	0	0	Unaltered
EA700253	Male	66	PD-1	Clear cell renal cell carcinoma	40	1	9.98768	NCB	1	0	0	0	0	0	0	0	0	0	0	0	0	0	0	0	0	0	0	0	0	0	0	0	0	0	0	0	0	0	0	Altered
EA698898	Male	50	PD-1	Clear cell renal cell carcinoma	69	0	56.4107	DCB	0	0	0	0	0	0	0	0	0	0	0	0	0	0	0	0	0	0	0	0	0	0	0	0	0	0	0	0	0	0	0	Unaltered
EA700453	Male	54	PD-1	Clear cell renal cell carcinoma	76	1	1.74127	NCB	1	0	0	1	0	0	0	0	0	0	0	0	0	0	0	0	0	0	0	0	0	0	0	0	0	0	0	0	0	0	0	Altered
EA698473	Male	57	PD-1	Clear cell renal cell carcinoma	85	1	36.4025	DCB	1	0	0	0	0	0	0	0	0	0	0	0	0	0	0	0	0	0	0	0	0	0	0	0	0	0	0	0	0	0	0	Altered
EA699986	Female	64	PD-1	Clear cell renal cell carcinoma	28	0	57.3963	DCB	0	0	0	0	0	0	0	0	0	0	0	0	0	0	0	0	0	0	0	0	0	0	0	0	0	0	0	0	0	0	0	Unaltered
EA700165	Male	68	PD-1	Clear cell renal cell carcinoma	68	1	11.6632	DCB	1	0	0	0	0	0	0	0	0	0	0	0	0	0	0	0	0	0	0	0	0	0	0	0	0	0	0	0	0	0	0	Altered
EA700009	Male	56	PD-1	Clear cell renal cell carcinoma	137	0	62.4887	DCB	1	0	0	0	0	0	0	0	0	0	0	0	0	0	0	1	0	0	0	0	0	0	0	0	0	0	0	0	0	0	0	Altered
EA698494	Male	53	PD-1	Clear cell renal cell carcinoma	67	1	14.3244	DCB	0	0	0	0	0	0	0	0	0	0	0	0	1	0	0	0	0	0	0	0	0	0	0	0	0	0	0	0	0	0	0	Altered
EA699897	Male	62	PD-1	Clear cell renal cell carcinoma	83	0	65.9384	DCB	0	0	0	0	0	0	0	0	0	0	0	0	0	0	0	0	0	1	0	0	0	0	0	0	0	0	0	0	0	0	0	Altered
EA698866	Male	49	PD-1	Clear cell renal cell carcinoma	66	1	1.577	NCB	1	0	0	0	0	0	0	0	0	0	0	0	0	0	0	0	0	0	0	0	0	0	0	0	0	0	0	0	0	0	0	Altered
EA700184	Male	51	PD-1	Clear cell renal cell carcinoma	40	1	6.47228	NCB	0	0	0	0	0	0	0	0	0	0	0	0	0	0	0	0	0	0	0	0	0	0	0	0	0	0	0	0	0	0	0	Unaltered
EA698478	Male	57	PD-1	Clear cell renal cell carcinoma	64	0	53.1581	DCB	0	0	0	1	0	0	0	0	0	0	0	0	0	0	0	0	0	0	0	0	0	0	0	0	0	0	0	0	0	0	0	Altered
EA700517	Male	52	PD-1	Clear cell renal cell carcinoma	85	1	6.53799	NCB	0	0	0	0	0	0	0	0	0	0	0	0	0	0	0	0	0	0	0	0	0	0	0	0	0	0	0	0	0	0	0	Unaltered
EA698353	Male	70	PD-1	Clear cell renal cell carcinoma	105	1	13.1088	NCB	1	0	0	0	0	0	0	0	0	0	0	0	0	0	0	0	0	0	0	0	0	0	0	0	0	0	0	0	0	0	0	Altered
EA698905	Male	59	PD-1	Clear cell renal cell carcinoma	30	1	23.3593	DCB	0	0	0	0	0	0	0	0	0	0	0	0	0	0	0	0	0	0	0	0	0	0	0	0	0	0	0	0	0	0	0	Unaltered
EA699743	Female	53	PD-1	Clear cell renal cell carcinoma	70	1	10.152	DCB	1	0	0	0	0	0	0	0	0	0	0	0	0	0	0	0	0	0	0	0	0	0	0	0	0	0	0	0	0	0	0	Altered
EA700381	Male	44	PD-1	Clear cell renal cell carcinoma	69	0	22.9651	DCB	0	0	0	0	0	0	0	0	0	0	0	0	0	0	1	0	0	0	0	0	0	0	0	0	0	0	0	0	0	0	0	Altered
EA699904	Male	67	PD-1	Clear cell renal cell carcinoma	68	0	22.0123	DCB	0	0	0	0	0	0	0	0	0	0	0	0	0	0	0	0	0	0	0	0	0	0	0	0	0	0	0	0	0	0	0	Unaltered
EA698870	Male	56	PD-1	Clear cell renal cell carcinoma	41	0	57.232	DCB	1	0	0	0	0	0	0	0	0	0	0	0	0	0	0	0	0	0	0	0	0	0	0	0	0	0	0	0	0	0	0	Altered
EA700430	Male	70	PD-1	Clear cell renal cell carcinoma	55	1	26.3162	DCB	0	0	0	0	0	0	0	0	0	0	0	0	0	0	0	0	0	0	0	0	0	0	0	0	0	0	0	0	0	0	0	Unaltered
EA700556	Female	54	PD-1	Clear cell renal cell carcinoma	90	0	53.5195	DCB	1	0	0	0	0	0	0	0	0	0	0	0	0	0	0	0	0	0	0	0	0	0	0	0	0	0	0	0	0	0	0	Altered
EA700541	Male	74	PD-1	Clear cell renal cell carcinoma	101	1	15.8357	DCB	1	0	0	0	0	0	0	0	0	0	0	0	0	0	0	0	0	0	0	0	0	0	0	0	0	0	0	0	0	0	0	Altered
EA700271	Male	52	PD-1	Clear cell renal cell carcinoma	77	1	15.8357	NCB	0	0	0	0	0	1	0	0	0	0	0	0	0	0	0	0	0	0	0	0	0	0	0	0	0	0	0	0	0	0	0	Altered
EA700082	Male	66	PD-1	Clear cell renal cell carcinoma	175	1	12.8131	DCB	1	0	0	0	0	0	0	0	0	0	0	0	0	0	0	0	0	0	0	0	0	0	0	0	0	0	0	0	0	0	0	Altered
EA699646	Male	61	PD-1	Clear cell renal cell carcinoma	105	1	3.54825	NCB	1	0	0	0	0	0	0	0	0	0	0	0	1	0	0	0	0	0	0	0	0	0	0	0	0	0	0	0	0	0	0	Altered
EA699620	Male	64	PD-1	Clear cell renal cell carcinoma	53	1	10.4805	DCB	0	0	0	0	0	0	0	0	0	0	0	0	0	0	0	0	0	0	0	0	0	0	0	0	0	0	0	0	0	0	0	Unaltered
EA699717	Male	62	PD-1	Clear cell renal cell carcinoma	70	1	56.5421	NCB	1	0	0	0	0	0	0	0	0	0	0	0	0	0	0	0	0	0	0	0	0	0	0	0	0	0	0	0	0	0	0	Altered
EA700623	Male	75	PD-1	Clear cell renal cell carcinoma	61	1	41.5277	DCB	1	0	0	0	0	0	0	0	0	0	0	0	0	0	0	0	0	0	0	0	0	0	0	0	0	0	0	0	0	0	0	Altered
EA700097	Female	39	PD-1	Clear cell renal cell carcinoma	78	1	13.3388	NCB	0	0	0	0	0	0	0	0	0	0	0	0	0	0	0	0	0	0	0	0	0	0	0	0	0	0	0	0	0	0	0	Unaltered
EA699906	Female	41	PD-1	Clear cell renal cell carcinoma	51	1	0.525667	DCB	1	0	0	0	0	0	0	0	0	0	0	0	0	0	0	0	0	0	0	0	0	0	0	0	0	0	0	0	0	0	0	Altered
EA698469	Male	40	PD-1	Clear cell renal cell carcinoma	52	1	4.73101	NCB	0	0	0	0	0	0	0	0	0	0	0	0	0	0	0	0	0	0	0	0	0	0	0	0	0	0	0	0	0	0	0	Unaltered
EA700545	Male	37	PD-1	Clear cell renal cell carcinoma	34	0	55.6879	DCB	0	0	0	0	0	0	0	0	0	0	0	0	0	0	1	0	0	0	0	0	0	0	0	0	0	0	0	0	0	0	0	Altered
EA700543	Female	65	PD-1	Clear cell renal cell carcinoma	57	1	16.9528	NCB	0	0	0	0	0	0	0	0	0	0	0	0	0	0	0	0	0	0	0	0	0	0	0	0	0	0	0	0	0	0	0	Unaltered
EA700091	Male	85	PD-1	Clear cell renal cell carcinoma	89	1	15.3758	DCB	0	0	0	0	0	0	0	0	0	0	0	0	0	0	0	0	0	0	0	0	0	0	0	0	0	0	0	0	0	0	0	Unaltered
EA700619	Female	78	PD-1	Clear cell renal cell carcinoma	44	1	1.18275	DCB	0	0	0	0	0	0	0	0	0	0	0	0	0	0	0	0	0	0	0	0	0	0	0	0	0	0	0	0	0	0	0	Unaltered
EA700337	Male	66	PD-1	Clear cell renal cell carcinoma	67	1	13.4374	NCB	0	0	0	0	0	0	0	0	0	0	0	1	0	0	0	0	0	0	0	0	0	0	0	0	0	0	0	0	0	0	0	Altered
EA700010	Female	55	PD-1	Clear cell renal cell carcinoma	157	1	12.5175	DCB	0	0	0	0	0	0	0	0	0	0	0	0	0	0	0	0	0	0	0	0	0	0	0	0	0	0	0	0	0	0	0	Unaltered
EA700380	Male	72	PD-1	Clear cell renal cell carcinoma	60	1	30.7844	DCB	1	0	0	0	0	0	0	0	0	0	0	0	0	0	0	0	0	0	0	0	0	0	0	0	0	0	0	0	0	0	0	Altered
EA698346	Male	71	PD-1	Clear cell renal cell carcinoma	86	1	20.7967	DCB	0	0	0	0	0	0	0	0	0	0	0	0	0	0	0	0	0	0	0	0	0	0	0	0	0	0	0	0	0	0	0	Unaltered
EA700544	Female	45	PD-1	Clear cell renal cell carcinoma	57	0	59.8275	DCB	0	0	0	0	0	0	0	0	0	0	0	0	0	0	0	0	0	0	0	0	0	0	0	0	0	0	0	0	0	0	0	Unaltered
EA700377	Male	66	PD-1	Clear cell renal cell carcinoma	103	1	12.1232	NCB	1	0	0	0	0	0	0	0	0	0	0	0	0	0	0	0	0	0	0	0	0	0	0	0	0	0	0	0	0	0	0	Altered
EA700090	Male	63	PD-1	Clear cell renal cell carcinoma	164	1	23.1622	NCB	1	0	0	0	0	0	0	0	0	0	0	0	0	0	0	0	0	0	0	0	0	0	0	0	0	0	0	0	0	0	0	Altered
EA698329	Male	71	PD-1	Clear cell renal cell carcinoma	80	1	42.3819	DCB	0	0	0	0	0	0	0	0	0	0	0	0	0	0	0	0	0	0	0	0	0	0	0	0	0	0	0	0	0	0	0	Unaltered
EA700459	Female	78	PD-1	Clear cell renal cell carcinoma	95	1	3.94251	DCB	0	0	0	0	0	0	0	0	0	0	0	0	0	0	0	0	0	0	0	0	0	0	0	0	0	0	0	0	0	0	0	Unaltered
EA699655	Male	59	PD-1	Clear cell renal cell carcinoma	93	1	19.6468	DCB	1	0	0	0	0	0	0	0	0	0	0	0	0	0	0	0	0	0	0	0	0	0	0	0	0	0	0	0	0	0	0	Altered
EA699737	Male	60	PD-1	Clear cell renal cell carcinoma	101	1	11.2361	DCB	0	0	0	0	0	0	0	0	0	0	0	0	0	0	1	0	0	0	0	0	0	0	0	0	0	0	0	0	0	0	0	Altered
EA698479	Male	77	PD-1	Clear cell renal cell carcinoma	138	1	25.5277	DCB	0	0	0	0	0	0	0	0	0	0	0	0	0	0	1	0	0	0	0	0	0	0	0	0	0	0	0	0	0	0	0	Altered
EA700373	Male	64	PD-1	Clear cell renal cell carcinoma	42	1	46.3573	DCB	0	0	0	0	0	0	0	0	0	0	0	0	0	0	0	0	0	0	0	0	0	0	0	0	0	0	0	0	0	0	0	Unaltered
EA700259	Male	67	PD-1	Clear cell renal cell carcinoma	116	1	13.7988	NCB	0	0	0	0	0	0	0	0	0	0	0	0	0	0	0	0	0	0	0	0	0	0	0	0	0	0	0	0	0	0	0	Unaltered
EA699708	Female	70	PD-1	Clear cell renal cell carcinoma	41	1	21.3552	DCB	0	0	0	0	0	0	0	0	0	0	0	0	0	0	0	0	0	0	0	0	0	0	0	0	0	0	0	0	0	0	0	Unaltered
EA699614	Male	63	PD-1	Clear cell renal cell carcinoma	82	1	42.1848	DCB	1	0	0	0	0	0	0	0	0	0	0	0	0	0	0	0	0	0	0	0	0	0	0	0	0	0	0	0	0	0	0	Altered
EA698448	Male	36	PD-1	Clear cell renal cell carcinoma	46	1	15.1129	NCB	0	0	0	0	0	0	0	0	0	0	0	0	0	0	0	0	0	0	0	0	0	0	0	0	0	0	0	0	0	0	0	Unaltered
EA700458	Male	75	PD-1	Clear cell renal cell carcinoma	91	1	44.5832	DCB	0	0	0	0	0	0	0	0	0	0	0	0	0	0	0	0	0	0	0	0	0	0	0	0	0	0	0	0	0	0	0	Unaltered
EA698460	Male	67	PD-1	Clear cell renal cell carcinoma	181	0	17.8398	DCB	1	0	0	0	0	0	0	0	0	0	0	0	1	0	0	0	0	0	0	0	0	0	0	0	0	0	0	0	0	0	0	Altered
EA700255	Male	73	PD-1	Clear cell renal cell carcinoma	86	1	44.386	DCB	0	0	0	0	0	0	0	0	0	0	0	0	0	0	0	0	0	0	0	0	0	0	0	0	0	0	0	0	0	0	0	Unaltered
EA700624	Male	69	PD-1	Clear cell renal cell carcinoma	64	1	37.8152	DCB	0	0	0	0	0	0	0	0	0	0	0	0	0	0	0	0	0	0	0	0	0	0	0	0	0	0	0	0	0	0	0	Unaltered
EA700279	Male	63	PD-1	Clear cell renal cell carcinoma	70	1	19.5811	DCB	0	0	0	0	0	0	0	0	0	0	0	0	0	0	0	0	0	0	0	0	0	0	0	0	0	0	0	0	0	0	0	Unaltered
EA699809	Male	58	PD-1	Clear cell renal cell carcinoma	76	1	16.9199	DCB	0	0	1	0	0	0	0	0	0	0	0	0	0	0	0	0	0	0	0	0	0	0	0	0	0	0	0	0	0	0	0	Altered
EA699642	Female	59	PD-1	Clear cell renal cell carcinoma	84	1	25.9877	DCB	1	0	0	0	0	0	0	0	0	0	0	0	0	0	0	0	0	0	0	0	0	0	0	0	0	0	0	0	0	0	0	Altered
EA700455	Female	56	PD-1	Clear cell renal cell carcinoma	123	1	4.36961	NCB	1	1	0	0	0	0	0	0	0	0	0	0	0	0	0	0	0	0	0	0	0	0	0	0	0	0	0	0	0	0	0	Altered
EA698867	Female	61	PD-1	Clear cell renal cell carcinoma	55	1	2.39836	DCB	0	0	0	0	0	0	0	0	0	0	0	0	0	0	0	0	0	0	0	0	0	0	0	0	0	0	0	0	0	0	0	Unaltered
EA698474	Female	59	PD-1	Clear cell renal cell carcinoma	70	0	61.9959	DCB	1	0	0	0	0	0	0	0	0	0	0	0	0	0	0	0	0	0	0	0	0	0	0	0	0	0	0	0	0	0	0	Altered
EA700468	Male	63	PD-1	Clear cell renal cell carcinoma	49	1	5.02669	NCB	0	0	0	0	0	0	0	0	0	0	0	0	0	0	0	0	0	0	0	0	0	0	0	0	0	0	0	0	0	0	0	Unaltered
EA699823	Male	62	PD-1	Clear cell renal cell carcinoma	27	1	4.20534	NCB	0	0	0	0	0	0	0	0	0	0	0	1	0	0	0	0	0	0	0	0	0	0	0	0	0	0	0	0	0	0	0	Altered
EA699622	Female	47	PD-1	Clear cell renal cell carcinoma	52	1	16.7885	NCB	1	0	0	0	0	0	0	0	0	0	0	0	0	0	0	0	0	0	0	0	0	0	0	0	0	0	0	0	0	0	0	Altered
EA698881	Male	50	PD-1	Clear cell renal cell carcinoma	132	0	5.51951	NCB	0	0	0	0	0	0	0	0	0	0	0	0	0	0	0	0	0	0	0	0	0	0	0	0	0	0	0	0	0	0	0	Unaltered
EA700552	Male	72	PD-1	Clear cell renal cell carcinoma	130	1	19.0554	DCB	0	0	0	0	0	0	0	0	0	0	0	0	0	0	0	0	0	0	0	0	0	0	0	0	0	0	0	0	0	0	0	Unaltered
EA699797	Male	71	PD-1	Clear cell renal cell carcinoma	79	0	52.9938	DCB	0	0	0	0	0	0	0	0	0	0	0	0	0	0	0	0	0	0	0	0	0	0	0	0	0	0	0	0	0	0	0	Unaltered
EA698341	Male	58	PD-1	Clear cell renal cell carcinoma	103	1	13.3388	NCB	0	0	0	1	0	0	0	0	0	0	0	0	0	0	0	0	0	0	0	0	0	0	0	0	0	0	0	0	0	0	0	Altered
EA700521	Female	68	PD-1	Clear cell renal cell carcinoma	73	1	14.883	NCB	0	0	0	0	0	0	0	0	0	0	0	0	0	0	0	0	0	0	0	0	0	0	0	0	0	0	0	0	0	0	0	Unaltered
EA699811	Male	57	PD-1	Clear cell renal cell carcinoma	66	0	51.5154	DCB	1	0	0	0	0	0	0	0	0	0	0	0	0	0	0	0	0	0	0	0	0	0	0	0	0	0	0	0	0	0	0	Altered
EA699888	Male	56	PD-1	Clear cell renal cell carcinoma	92	0	57.2649	NCB	0	0	0	0	0	0	0	0	0	0	0	0	1	0	0	0	0	0	0	0	0	0	0	0	0	0	0	0	0	0	0	Altered
EA698886	Male	71	PD-1	Clear cell renal cell carcinoma	59	1	34.037	NCB	1	0	0	0	0	0	0	0	0	0	0	0	0	0	0	0	0	0	0	0	0	0	0	0	0	0	0	0	0	0	0	Altered
EA699651	Male	63	PD-1	Clear cell renal cell carcinoma	70	0	55.3593	DCB	1	0	0	0	0	0	0	0	0	0	0	0	0	0	0	0	0	0	0	0	0	0	0	0	0	0	0	0	0	0	0	Altered
EA700361	Male	73	PD-1	Clear cell renal cell carcinoma	78	0	55.2936	DCB	1	0	1	0	0	0	0	0	0	0	0	0	0	0	1	0	0	0	0	0	0	0	0	0	0	0	0	0	0	0	0	Altered
EA699613	Male	67	PD-1	Clear cell renal cell carcinoma	58	0	55.1294	DCB	0	0	0	0	0	0	0	1	0	0	0	0	0	0	0	0	0	0	0	0	0	0	0	0	0	0	0	0	0	0	0	Altered
EA700640	Female	63	PD-1	Clear cell renal cell carcinoma	34	0	63.5072	NCB	0	0	0	0	0	0	0	0	0	0	0	0	0	0	0	0	0	0	0	0	0	0	0	0	0	0	0	0	0	0	0	Unaltered
EA700539	Female	60	PD-1	Clear cell renal cell carcinoma	39	1	8.87064	NCB	0	1	0	0	0	0	0	0	0	0	0	0	0	0	0	0	0	0	0	0	0	0	0	0	0	0	0	0	0	0	0	Altered
EA700548	Female	74	PD-1	Clear cell renal cell carcinoma	95	1	9.59343	DCB	1	0	0	0	0	0	0	0	0	0	0	0	0	0	0	0	0	0	0	0	0	0	0	0	0	0	0	0	0	0	0	Altered
EA698468	Female	66	PD-1	Clear cell renal cell carcinoma	51	1	13.8645	DCB	1	0	0	0	0	0	0	0	0	0	0	0	0	0	0	0	0	0	0	0	0	0	0	0	0	0	0	0	0	0	0	Altered
EA700457	Male	52	PD-1	Clear cell renal cell carcinoma	47	0	54.8008	NCB	1	0	0	0	0	0	0	0	0	0	0	0	0	0	0	0	0	0	0	0	0	0	0	0	0	0	0	0	0	0	0	Altered
EA699981	Male	53	PD-1	Clear cell renal cell carcinoma	260	0	62.0945	NCB	0	0	0	0	0	0	0	0	0	0	0	0	0	1	0	1	0	0	0	0	0	0	0	0	0	0	0	0	0	0	0	Altered
EA699800	Female	74	PD-1	Clear cell renal cell carcinoma	123	1	46.1602	DCB	0	0	0	0	0	0	0	0	0	0	0	0	0	0	0	0	0	0	0	0	0	0	0	0	0	0	0	0	0	0	0	Unaltered
RCC_1-Tumor-SM-A46EX	Female	49	PD-1	Clear cell renal cell carcinoma	59	0	1.4137	NCB	0	0	0	0	0	0	0	1	0	0	0	0	0	0	0	0	0	0	0	0	0	0	0	0	0	0	0	0	0	0	0	Altered
RCC_10-Tumor-SM-A46EN	Female	64	PD-1	Clear cell renal cell carcinoma	81	0	34.7836	DCB	1	0	0	0	0	0	0	0	0	0	0	0	0	0	0	0	0	0	0	0	0	0	0	0	0	0	0	0	0	0	0	Altered
RCC_102-Tumor-SM-A46FM	Female	64	PD-1	Clear cell renal cell carcinoma	111	0	5.42466	DCB	1	0	0	0	0	0	1	0	0	0	0	0	0	0	0	0	0	0	0	0	0	0	0	0	0	0	0	0	0	0	0	Altered
RCC_105-Tumor-SM-A46FA	Female	64	PD-1	Clear cell renal cell carcinoma	99	1	3.87945	NCB	0	0	0	0	0	0	0	0	0	0	0	0	0	0	0	0	0	0	0	0	0	0	0	0	0	0	0	0	0	0	0	Unaltered
RCC_106-Tumor-SM-A46FT	Female	61	PD-1	Clear cell renal cell carcinoma	71	0	28.6027	DCB	1	0	0	0	0	0	0	0	0	0	0	0	0	0	0	0	0	0	0	0	0	0	0	0	0	0	0	0	0	0	0	Altered
RCC_11-Tumor-SM-A46F1	Female	50	PD-1	Clear cell renal cell carcinoma	59	0	33.6658	DCB	0	0	0	0	1	1	0	0	0	0	0	0	0	0	0	0	0	0	0	0	0	0	0	0	0	0	0	0	0	0	0	Altered
RCC_114-Tumor-SM-A46FO	Female	57	PD-1	Clear cell renal cell carcinoma	57	0	11.1781	DCB	1	0	0	0	0	0	0	0	0	0	0	0	0	0	0	0	0	0	0	0	0	0	0	0	0	0	0	0	0	0	0	Altered
RCC_115-Tumor-SM-A46FY	Female	60	PD-1	Clear cell renal cell carcinoma	62	0	12.0329	DCB	0	0	0	0	0	0	0	0	0	0	0	0	0	0	0	0	0	0	0	0	0	0	0	0	0	0	0	0	0	0	0	Unaltered
RCC_117-Tumor-SM-A46FP	Female	58	PD-1	Clear cell renal cell carcinoma	61	0	2.10411	DCB	1	0	0	0	0	0	0	0	0	0	0	0	0	0	0	0	0	0	0	0	0	0	0	0	0	0	0	0	0	0	0	Altered
RCC_119-Tumor-SM-A46FX	Female	72	PD-1	Clear cell renal cell carcinoma	60	0	25.4137	DCB	1	0	0	0	0	0	0	0	0	0	0	0	0	0	0	0	0	0	0	0	0	0	0	0	0	0	0	0	0	0	0	Altered
RCC_14-Tumor-SM-A46F5	Female	59	PD-1	Clear cell renal cell carcinoma	84	0	33.6986	DCB	1	0	0	0	0	0	0	0	0	0	0	0	0	0	0	0	0	0	0	0	0	0	0	0	0	0	0	0	0	0	0	Altered
RCC_15-Tumor-SM-A46EE	Female	73	PD-1	Clear cell renal cell carcinoma	72	1	33.3041	DCB	1	0	0	0	0	0	0	0	0	0	0	0	0	0	0	0	0	0	0	0	0	0	0	0	0	0	0	0	0	0	0	Altered
RCC_18-Tumor-SM-A46EL	Female	68	PD-1	Clear cell renal cell carcinoma	60	0	3.64932	NCB	1	0	0	0	0	0	0	0	0	0	0	0	0	0	0	0	0	0	0	0	0	0	0	0	0	0	0	0	0	0	0	Altered
RCC_20-Tumor-SM-A46EG	Female	76	PD-1	Clear cell renal cell carcinoma	48	0	35.0137	DCB	1	1	0	0	0	0	0	0	0	0	0	0	0	0	0	0	0	0	0	0	0	0	0	0	0	0	0	0	0	0	0	Altered
RCC_21-Tumor-SM-A46FB	Female	64	PD-1	Clear cell renal cell carcinoma	81	0	11.474	DCB	1	0	0	0	0	0	0	0	0	0	0	0	0	0	0	0	0	0	0	0	0	0	0	0	0	0	0	0	0	0	0	Altered
RCC_25-Tumor-SM-A46EF	Female	72	PD-1	Clear cell renal cell carcinoma	111	1	5.49041	NCB	0	0	0	0	0	0	0	0	0	0	0	0	0	0	0	0	0	0	0	0	0	0	0	0	0	0	0	0	0	0	0	Unaltered
RCC_27-Tumor-SM-A46ES	Female	59	PD-1	Clear cell renal cell carcinoma	95	0	31.8247	NCB	1	0	1	0	0	0	0	0	0	0	0	0	0	0	0	0	0	0	0	0	0	0	0	0	0	0	0	0	0	0	0	Altered
RCC_32-Tumor-SM-A46FH	Female	65	PD-1	Clear cell renal cell carcinoma	83	1	7.89041	DCB	0	0	1	0	0	0	0	0	0	0	0	0	0	0	0	0	0	0	0	0	0	0	0	0	0	0	0	0	0	0	0	Altered
RCC_39-Tumor-SM-A46EP	Female	72	PD-1	Clear cell renal cell carcinoma	83	1	10.0603	NCB	0	0	0	0	0	0	0	0	0	0	0	0	0	0	0	0	0	0	0	0	0	0	0	0	0	0	0	0	0	0	0	Unaltered
RCC_41-Tumor-SM-A46FE	Female	66	PD-1	Clear cell renal cell carcinoma	71	0	6.41096	NCB	0	0	0	0	0	0	0	0	0	0	0	0	0	0	0	0	0	0	0	0	0	0	0	0	0	0	0	0	0	0	0	Unaltered
RCC_50-Tumor-SM-A46EK	Female	63	PD-1	Clear cell renal cell carcinoma	125	0	32.2849	DCB	1	0	0	0	0	0	0	0	0	0	0	0	0	0	0	0	0	0	0	0	0	0	0	0	0	0	0	0	0	0	0	Altered
RCC_52-Tumor-SM-A46EU	Female	63	PD-1	Clear cell renal cell carcinoma	89	0	32.7123	DCB	1	0	0	0	0	0	0	0	0	0	0	0	0	0	0	0	0	0	0	0	0	0	0	0	0	0	0	0	0	0	0	Altered
RCC_56-Tumor-SM-A46EJ	Female	62	PD-1	Clear cell renal cell carcinoma	97	0	32.6137	DCB	0	0	0	0	0	0	0	0	0	0	0	0	0	0	0	0	0	0	0	0	0	0	0	0	0	0	0	0	0	0	0	Unaltered
RCC_58-Tumor-SM-A46FJ	Female	55	PD-1	Clear cell renal cell carcinoma	60	0	32.4822	DCB	0	0	0	0	0	0	0	0	0	0	0	0	0	0	0	0	0	0	0	0	0	0	0	0	0	0	0	0	0	0	0	Unaltered
RCC_62-Tumor-SM-A46FI	Female	48	PD-1	Clear cell renal cell carcinoma	79	0	3.48493	DCB	1	0	0	1	0	0	0	0	0	0	0	0	0	0	0	0	0	0	0	0	0	0	0	0	0	0	0	0	0	0	0	Altered
RCC_68-Tumor-SM-A46FC	Female	69	PD-1	Clear cell renal cell carcinoma	101	1	24.3288	NCB	0	0	0	0	0	0	0	0	0	0	0	0	0	0	0	0	0	0	0	0	0	0	0	0	0	0	0	0	0	0	0	Unaltered
RCC_73-Tumor-SM-A46FG	Female	77	PD-1	Clear cell renal cell carcinoma	44	1	5.85205	NCB	0	0	0	0	0	0	0	0	0	0	0	0	0	0	0	0	0	0	0	0	0	0	0	0	0	0	0	0	0	0	0	Unaltered
RCC_79-Tumor-SM-A46ER	Female	61	PD-1	Clear cell renal cell carcinoma	52	0	28.7014	DCB	1	0	0	0	0	0	0	0	0	0	0	0	0	0	0	0	0	0	0	0	0	0	0	0	0	0	0	0	0	0	0	Altered
RCC_84-Tumor-SM-A46FL	Female	55	PD-1	Clear cell renal cell carcinoma	84	1	22.3562	DCB	1	0	0	0	0	0	0	0	0	0	0	0	0	0	0	0	0	0	0	0	0	0	0	0	0	0	0	0	0	0	0	Altered
RCC_85-Tumor-SM-A46EQ	Female	36	PD-1	Clear cell renal cell carcinoma	51	1	23.4082	DCB	0	0	0	0	0	0	0	0	0	0	0	0	0	0	0	0	0	0	0	0	0	0	0	0	0	0	0	0	0	0	0	Unaltered
RCC_90-Tumor-SM-A46F3	Female	54	PD-1	Clear cell renal cell carcinoma	100	1	16.4055	NCB	0	0	0	0	0	0	0	0	0	0	0	0	0	0	0	0	0	0	0	0	0	0	0	0	0	0	0	0	0	0	0	Unaltered
RCC_93-Tumor-SM-A46F8	Female	64	PD-1	Clear cell renal cell carcinoma	87	1	22.4877	DCB	1	0	0	0	0	0	0	0	0	0	0	0	0	0	0	0	0	0	0	0	0	0	0	0	0	0	0	0	0	0	0	Altered
RCC_96-Tumor-SM-A46FW	Female	75	PD-1	Clear cell renal cell carcinoma	150	0	19.1342	NCB	1	0	0	0	0	0	0	0	0	0	0	0	0	0	0	0	0	0	0	0	0	0	0	0	0	0	0	0	0	0	0	Altered
RCC_97-Tumor-SM-A46EW	Female	54	PD-1	Clear cell renal cell carcinoma	78	0	28.6356	NCB	1	0	0	0	0	0	0	0	0	0	0	0	0	0	0	0	0	0	0	0	0	0	0	0	0	0	0	0	0	0	0	Altered
RCC_99-Tumor-SM-A46F7	Female	50	PD-1	Clear cell renal cell carcinoma	99	1	1.34795	NCB	0	0	0	0	0	0	0	0	0	0	0	0	0	0	0	0	0	0	0	0	0	0	0	0	0	0	0	0	0	0	0	Unaltered

## Sheet: S7 GIC_PUCH_2021
Supplementary Table S7. Clinical information of patients in the GIC PUCH 2021 cohort.
#1: Altered; 0: Unaltered
PATIENT_ID	SEX	AGE	DRUG_TYPE	CANCER_TYPE	TMB_NONSYNONYMOUS	OS_STATUS	OS_MONTHS	BENEFIT	ARID1A#	ARID2	SMARCC2	BCL11A	ARID1B	SMARCE1	BICRA	SMARCB1	DPF2	PBRM1	SMARCD3	SMARCD1	ACTB	SMARCA4	DPF1	PHF10	SMARCA2	SMARCD2	ACTL6B	BCL7C	BICRAL	BCL11B	ACTL6A	SS18	SMARCC1	BRD9	BCL7B	BCL7A	DPF3	SS18L1	BRD7	SWI/SNF_Alteration(31genes)
P100	Male	72	High	PD-1/PDL-1	46.8557	0	11.2333	DCB	1	1	1	1	1	0	0	0	0	0	0	0	0	0	0	0	0	0	0	0	0	0	0	0	0	0	0	0	0	0	0	Altered
P101	Female	50	Low	Combo	4.9189	0	7.43333	NDB	1	0	0	0	0	1	0	0	0	0	0	0	0	0	0	0	0	0	0	0	0	0	0	0	0	0	0	0	0	0	0	Altered
P102	Male	54	Low	Combo	5.2372	0	7.7	DCB	0	0	0	0	0	0	0	0	0	0	0	0	0	0	0	0	0	0	0	0	0	0	0	0	0	0	0	0	0	0	0	Unaltered
P103	Female	71	Low	PD-1/PDL-1	4.3374	0	4.73333	DCB	0	0	1	0	0	0	0	0	0	0	0	0	0	0	0	0	0	0	0	0	0	0	0	0	0	0	0	0	0	0	0	Altered
P104	Female	75	Low	PD-1/PDL-1	7.0611	0	6.73333	DCB	0	0	0	0	0	0	0	0	0	0	0	0	0	0	0	0	0	0	0	0	0	0	0	0	0	0	0	0	0	0	0	Unaltered
P105	Male	58	Low	PD-1/PDL-1	7.2567	1	2.06667	DCB	0	0	0	0	0	0	0	0	0	0	0	0	0	0	0	0	0	0	0	0	0	0	0	0	0	0	0	0	0	0	0	Unaltered
P106	Male	31	High	PD-1/PDL-1	117.919	0	4.16667	DCB	0	0	1	0	0	0	0	0	0	0	0	0	0	0	0	0	0	0	0	0	0	0	0	0	0	0	0	0	0	0	0	Altered
P107	Male	69	Low	PD-1/PDL-1	2.5655	1	5.23333	DCB	0	0	0	0	0	0	0	0	0	0	0	0	0	0	0	0	0	0	0	0	0	0	0	0	0	0	0	0	0	0	0	Unaltered
P108	Male	76	Low	Combo	1.1542	0	4.23333	DCB	1	0	0	0	0	0	0	0	0	0	0	0	0	0	0	0	0	0	0	0	0	0	0	0	0	0	0	0	0	0	0	Altered
P109	Male	57	Low	PD-1/PDL-1	1.1755	1	2.4	NDB	0	0	0	0	0	0	0	0	0	0	0	0	0	0	0	0	0	0	0	0	0	0	0	0	0	0	0	0	0	0	0	Unaltered
P11	Female	60	Low	PD-1/PDL-1	3.1222	0	6.23333	NDB	0	0	0	0	0	0	0	0	0	0	0	0	0	0	0	0	0	0	0	0	0	0	0	0	0	0	0	0	0	0	0	Unaltered
P110	Male	48	High	Combo	39.2826	0	3.73333	DCB	1	1	0	0	0	0	1	1	0	0	0	0	0	0	0	0	0	0	0	0	0	0	0	0	0	0	0	0	0	0	0	Altered
P111	Male	52	Low	PD-1/PDL-1	8.6049	0	2.2	DCB	0	0	0	0	0	0	0	0	0	0	0	0	0	0	0	0	0	0	0	0	0	0	0	0	0	0	0	0	0	0	0	Unaltered
P112	Male	64	Low	PD-1/PDL-1	4.381	0	2.13333	DCB	0	0	1	0	0	0	0	0	0	0	0	0	0	0	0	0	0	0	0	0	0	0	0	0	0	0	0	0	0	0	0	Altered
P113	Male	57	Low	PD-1/PDL-1	4.1025	0	1.43333	DCB	0	0	0	0	0	0	0	0	1	0	0	0	0	0	0	0	0	0	0	0	0	0	0	0	0	0	0	0	0	0	0	Altered
P114	Male	64	High	PD-1/PDL-1	57.7256	0	4.2	DCB	1	0	1	0	0	0	0	0	1	1	1	0	0	0	0	0	0	0	0	0	0	0	0	0	0	0	0	0	0	0	0	Altered
P115	Female	72	Low	PD-1/PDL-1	4.7138	0	2.76667	DCB	0	0	0	0	0	0	0	0	0	0	0	0	0	0	0	0	0	0	0	0	0	0	0	0	0	0	0	0	0	0	0	Unaltered
P116	Male	70	High	PD-1/PDL-1	17.4606	0	3.26667	DCB	0	0	0	1	0	0	0	0	0	0	0	1	0	0	0	0	0	0	0	0	0	0	0	0	0	0	0	0	0	0	0	Altered
P117	Female	75	Low	PD-1/PDL-1	5.7712	0	3.6	NDB	0	0	0	0	0	0	0	0	0	0	0	0	1	0	0	0	0	0	0	0	0	0	0	0	0	0	0	0	0	0	0	Altered
P118	Male	65	Low	PD-1/PDL-1	2.2574	1	2.73333	NDB	0	0	0	0	0	0	0	0	0	0	0	0	0	1	0	0	0	0	0	0	0	0	0	0	0	0	0	0	0	0	0	Altered
P120	Male	68	Low	Combo	5.0083	0	8.7	DCB	0	0	0	0	0	0	0	0	0	0	0	0	0	0	0	0	0	0	0	0	0	0	0	0	0	0	0	0	0	0	0	Unaltered
P122	Male	54	Low	PD-1/PDL-1	9.2057	0	8.23333	NDB	0	0	0	0	0	0	1	0	0	0	0	0	0	0	0	0	0	0	0	0	0	0	0	0	0	0	0	0	0	0	0	Altered
P124	Female	56	Low	PD-1/PDL-1	0.5361	1	0.6	NDB	0	0	0	0	0	0	0	0	0	0	0	0	0	0	0	0	0	0	0	0	0	0	0	0	0	0	0	0	0	0	0	Unaltered
P125	Male	63	Low	PD-1/PDL-1	3.8956	1	0.833333	NDB	0	0	0	0	0	0	0	0	0	0	0	0	0	0	0	0	0	0	0	0	0	0	0	0	0	0	0	0	0	0	0	Unaltered
P126	Male	62	Low	PD-1/PDL-1	12.4561	0	20.1	DCB	1	0	0	0	0	0	0	0	0	0	0	0	0	0	0	0	0	0	0	0	0	0	0	0	0	0	0	0	0	0	0	Altered
P13	Male	51	Low	PD-1/PDL-1	1.2055	1	2.26667	NDB	0	0	0	0	0	0	0	0	0	0	0	0	0	0	0	0	0	0	0	0	0	0	0	0	0	0	0	0	0	0	0	Unaltered
P14	Male	65	Low	PD-1/PDL-1	7.4449	1	5.57	NDB	0	0	0	0	0	0	0	0	0	0	0	0	0	0	0	0	0	0	0	0	0	0	0	0	0	0	0	0	0	0	0	Unaltered
P15	Male	48	Low	PD-1/PDL-1	1.9858	1	7.63	NDB	0	0	0	0	0	0	0	0	0	0	0	0	0	0	0	0	0	0	0	0	0	0	0	0	0	0	0	0	0	0	0	Unaltered
P18	Female	67	Low	PD-1/PDL-1	5.3614	0	14.5	DCB	1	0	0	0	0	0	0	0	0	0	0	0	0	0	0	0	0	0	0	0	0	0	0	0	0	0	0	0	0	0	0	Altered
P2	Male	41	High	PD-1/PDL-1	31.0107	1	1.26667	NDB	0	0	0	0	0	0	0	0	0	0	0	0	0	0	0	0	0	0	0	0	0	0	0	0	0	0	0	0	0	0	0	Unaltered
P20	Male	50	Low	PD-1/PDL-1	3.6468	1	9.87	DCB	0	0	0	0	0	0	0	0	1	0	0	0	0	0	0	0	0	0	0	0	0	0	0	0	0	0	0	0	0	0	0	Altered
P21	Female	31	Low	PD-1/PDL-1	5.136	1	3.6	NDB	0	0	0	0	0	0	0	0	0	0	0	0	0	0	0	0	0	0	0	0	0	0	0	0	0	0	0	0	0	0	0	Unaltered
P22	Male	63	Low	PD-1/PDL-1	4.6555	1	2.1	NDB	0	0	0	0	0	0	0	0	0	0	0	0	0	0	0	0	0	0	0	0	0	0	0	0	0	0	0	0	0	0	0	Unaltered
P25	Female	71	Low	PD-1/PDL-1	2.3239	0	12.63	DCB	0	0	0	0	0	0	0	0	0	0	0	0	0	0	0	0	0	0	0	0	0	0	0	0	0	0	0	0	0	0	0	Unaltered
P26	Male	37	High	PD-1/PDL-1	57.1259	0	16.13	DCB	1	0	1	0	1	0	1	0	0	1	0	0	0	0	1	0	0	0	0	0	0	0	0	0	0	0	0	0	0	0	0	Altered
P28	Male	26	High	PD-1/PDL-1	43.7217	0	20.3	DCB	0	1	0	1	1	0	0	0	0	0	0	0	0	1	0	1	0	0	0	0	0	0	0	0	0	0	0	0	0	0	0	Altered
P29	Female	68	High	PD-1/PDL-1	13.6212	0	6.4	DCB	0	0	0	0	0	0	0	0	0	0	0	0	0	0	0	0	0	0	0	0	0	0	0	0	0	0	0	0	0	0	0	Unaltered
P3	Male	49	Low	Combo	2.1747	1	3.76667	NDB	0	0	0	0	0	0	0	0	0	0	0	0	0	0	0	0	0	0	0	0	0	0	0	0	0	0	0	0	0	0	0	Unaltered
P30	Male	36	High	PD-1/PDL-1	38.1198	1	15.13	DCB	1	0	0	0	0	0	0	0	0	0	0	0	0	1	0	0	0	0	0	0	0	0	0	0	0	0	0	0	0	0	0	Altered
P32	Female	31	Low	PD-1/PDL-1	12.4472	0	25.53	DCB	0	0	0	1	0	0	0	0	0	0	0	0	0	0	0	0	0	0	0	0	0	0	0	0	0	0	0	0	0	0	0	Altered
P33	Male	55	Low	PD-1/PDL-1	6.6114	0	15.37	NDB	0	0	0	0	0	0	0	0	0	0	0	0	0	0	0	0	0	0	0	0	0	0	0	0	0	0	0	0	0	0	0	Unaltered
P34	Male	49	Low	PD-1/PDL-1	2.1731	0	15.37	DCB	0	0	0	0	0	0	0	0	0	0	0	0	0	0	0	0	0	0	0	0	0	0	0	0	0	0	0	0	0	0	0	Unaltered
P35	Male	62	Low	PD-1/PDL-1	2.4246	1	3.4	DCB	0	0	0	0	0	0	0	0	0	0	0	0	0	0	0	0	1	0	0	0	0	0	0	0	0	0	0	0	0	0	0	Altered
P36	Female	63	High	PD-1/PDL-1	18.824	1	9.83333	NDB	1	1	0	0	0	0	0	0	0	0	0	0	0	0	0	0	0	1	0	0	0	0	0	0	0	0	0	0	0	0	0	Altered
P39	Male	62	Low	PD-1/PDL-1	1.2599	1	19.2	NDB	0	0	1	0	0	0	0	0	0	0	0	0	0	0	0	0	0	0	0	0	0	0	0	0	0	0	0	0	0	0	0	Altered
P40	Male	42	Low	PD-1/PDL-1	2.9148	1	2.23333	NDB	0	0	0	0	0	0	0	0	0	0	0	0	0	0	0	0	0	0	0	0	0	0	0	0	0	0	0	0	0	0	0	Unaltered
P41	Female	63	Low	PD-1/PDL-1	3.1413	0	13.07	DCB	0	0	0	0	0	0	0	0	0	0	0	0	0	0	0	0	0	0	0	0	0	0	0	0	0	0	0	0	0	0	0	Unaltered
P42	Male	44	High	PD-1/PDL-1	42.7443	0	13.53	DCB	0	1	0	0	0	0	0	1	0	0	0	0	0	0	0	0	0	1	1	0	0	0	0	0	0	0	0	0	0	0	0	Altered
P43	Male	56	Low	PD-1/PDL-1	4.9737	1	4.3	NDB	0	0	0	0	0	0	0	0	0	0	0	0	0	0	0	0	0	0	0	0	0	0	0	0	0	0	0	0	0	0	0	Unaltered
P44	Male	63	Low	PD-1/PDL-1	5.0872	1	2	NDB	0	0	0	0	0	0	0	0	0	0	0	0	0	0	0	0	0	0	0	0	0	0	0	0	0	0	0	0	0	0	0	Unaltered
P47	Male	50	Low	PD-1/PDL-1	5.3012	0	1.9	DCB	0	0	0	0	0	0	0	0	0	0	0	0	0	0	0	0	0	0	0	0	0	0	0	0	0	0	0	0	0	0	0	Unaltered
P48	Female	48	High	PD-1/PDL-1	69.1122	1	12.37	NDB	1	0	1	0	1	0	1	0	0	0	0	0	0	1	0	0	1	0	0	1	0	0	0	0	0	0	0	0	0	0	0	Altered
P49	Male	59	High	PD-1/PDL-1	35.0064	0	17.3	DCB	1	0	0	0	0	0	0	1	0	0	0	0	0	0	0	0	0	0	0	0	0	0	0	0	0	0	0	0	0	0	0	Altered
P5	Male	44	High	PD-1/PDL-1	67.2821	0	17.57	DCB	0	0	0	0	0	0	0	0	1	0	0	0	0	0	0	0	0	0	0	0	0	1	1	0	0	0	0	0	0	0	0	Altered
P51	Male	38	Low	PD-1/PDL-1	2.5327	1	3.03333	NDB	0	0	0	0	0	0	0	0	0	0	0	0	0	0	0	0	0	0	0	0	0	0	0	0	0	0	0	0	0	0	0	Unaltered
P52	Male	26	High	PD-1/PDL-1	44.543	0	30.97	DCB	1	0	0	0	0	0	0	0	0	0	0	0	0	0	0	0	0	0	0	0	1	0	0	0	0	0	0	0	0	0	0	Altered
P6	Female	65	Low	PD-1/PDL-1	0	1	4.63333	NDB	1	0	0	0	1	0	1	0	0	0	0	0	0	0	1	0	0	0	0	0	0	0	1	1	0	0	0	0	0	0	0	Altered
P62	Male	55	Low	PD-1/PDL-1	5.8539	0	2.9	NDB	0	0	0	0	0	0	0	0	0	0	0	0	0	0	0	0	0	0	0	0	0	0	0	0	0	0	0	0	0	0	0	Unaltered
P64	Female	46	Low	PD-1/PDL-1	4.6072	1	4.46667	NDB	1	0	0	0	0	0	0	0	0	0	0	0	0	0	0	0	0	0	0	0	0	0	0	0	0	0	0	0	0	0	0	Altered
P65	Male	61	Low	PD-1/PDL-1	4.5747	1	3.63333	NDB	0	0	0	0	0	0	0	0	0	0	0	0	0	0	0	0	0	0	0	0	0	0	0	0	0	0	0	0	0	0	0	Unaltered
P66	Male	60	Low	Combo	4.0742	0	10.0333	NDB	0	0	0	0	0	0	0	0	0	0	0	0	0	1	0	0	0	0	0	0	0	0	0	0	0	0	0	0	0	0	0	Altered
P67	Male	76.1562	Low	PD-1/PDL-1	3.5001	1	11.4333	NDB	0	0	0	0	0	0	0	0	0	0	0	0	0	0	0	0	0	0	0	0	0	0	0	0	0	0	0	0	0	0	0	Unaltered
P68	Male	65	Low	PD-1/PDL-1	3.0176	0	6.86667	NDB	0	0	0	0	0	0	0	0	0	0	0	0	0	0	0	0	0	0	0	0	0	0	0	0	0	0	0	0	0	0	0	Unaltered
P69	Male	57	Low	PD-1/PDL-1	3.2656	1	6.23333	NDB	0	0	0	0	0	0	0	0	0	0	0	0	0	0	0	0	0	0	0	0	0	0	0	0	0	0	0	0	0	0	0	Unaltered
P7	Male	67	Low	PD-1/PDL-1	0.6512	0	6.23333	DCB	0	0	0	0	0	0	0	0	0	0	0	0	0	0	0	0	0	0	0	0	0	0	0	0	0	0	0	0	0	0	0	Unaltered
P70	Male	65	Low	PD-1/PDL-1	0.9094	0	9.46667	NDB	0	0	0	0	0	0	0	0	0	0	0	0	0	0	0	0	0	0	0	0	0	0	0	0	0	0	0	0	0	0	0	Unaltered
P71	Female	69	Low	PD-1/PDL-1	1.7031	0	8.13333	NDB	0	0	0	0	0	0	0	0	0	0	0	0	0	0	0	0	0	0	0	0	0	0	0	0	0	0	0	0	0	0	0	Unaltered
P72	Male	59	Low	PD-1/PDL-1	8.1879	0	8.16667	NDB	0	0	0	0	0	0	0	0	0	0	0	0	0	0	0	0	0	0	0	0	0	0	0	0	0	0	0	0	0	0	0	Unaltered
P73	Male	40	High	PD-1/PDL-1	134.891	1	4.26667	NDB	1	1	1	0	0	0	0	0	0	1	0	0	0	0	0	0	0	0	0	0	0	1	0	0	1	0	0	0	0	0	0	Altered
P74	Male	55	Low	PD-1/PDL-1	3.7734	0	7.93333	NDB	0	0	0	0	0	0	0	0	0	0	0	0	0	0	0	0	0	0	0	0	0	0	0	0	0	0	0	0	0	0	0	Unaltered
P75	Female	60	High	Combo	19.4795	1	4.03333	NDB	1	0	0	0	0	0	0	0	0	0	0	0	0	0	0	0	0	0	0	0	0	0	0	0	0	0	0	0	0	0	0	Altered
P76	Male	58	Low	PD-1/PDL-1	4.3279	1	5.6	NDB	0	0	0	0	0	0	0	0	0	0	0	0	0	0	0	0	0	0	0	0	0	0	0	0	0	0	0	0	0	0	0	Unaltered
P77	Female	63	Low	PD-1/PDL-1	3.5557	0	6.03333	NDB	0	0	0	0	0	0	0	0	0	0	0	0	0	0	0	0	0	0	0	0	0	0	0	0	0	0	0	0	0	0	0	Unaltered
P78	Female	63	Low	PD-1/PDL-1	0.9389	0	5.73333	NDB	0	0	0	0	0	0	0	0	0	0	0	0	0	0	0	0	0	0	0	0	0	0	0	0	0	0	0	0	0	0	0	Unaltered
P79	Male	56	Low	Combo	3.1965	0	7.23333	NDB	0	0	0	0	0	0	0	0	0	0	0	0	0	0	0	0	0	0	0	0	0	0	0	0	0	0	0	0	0	0	0	Unaltered
P80	Male	59	Low	PD-1/PDL-1	1.644	1	1.46667	NDB	0	0	0	0	0	0	0	0	0	0	0	0	0	0	0	0	0	0	0	0	0	0	0	0	0	0	0	0	0	0	0	Unaltered
P81	Male	57	Low	PD-1/PDL-1	0.796	1	3.23333	NDB	0	0	0	0	0	0	0	0	0	0	0	0	0	0	0	0	0	0	0	0	0	0	0	0	0	0	0	0	0	0	0	Unaltered
P82	Male	55	Low	PD-1/PDL-1	1.9566	0	4.4	NDB	0	0	0	0	0	0	0	0	0	0	0	0	0	0	0	0	0	0	0	0	0	0	0	0	0	0	0	0	0	0	0	Unaltered
P83	Female	23	Low	Combo	3.0705	0	3.66667	NDB	0	0	0	0	0	0	0	0	0	0	0	0	0	0	0	0	1	0	0	0	1	0	0	0	0	0	0	0	0	0	0	Altered
P84	Male	55	High	PD-1/PDL-1	14.4341	1	11.0667	NDB	1	0	0	0	0	0	0	0	0	0	0	0	0	0	0	0	1	0	0	0	0	0	0	0	0	0	0	0	0	0	0	Altered
P86	Male	65	Low	PD-1/PDL-1	4.5346	0	4.16667	NDB	0	0	0	0	0	0	0	0	0	0	0	0	0	0	0	0	0	0	0	0	0	0	0	0	0	0	0	0	0	0	0	Unaltered
P87	Male	61	Low	PD-1/PDL-1	8.2998	1	4.2	NDB	0	1	0	0	0	0	0	0	0	0	0	0	0	0	0	0	0	0	0	0	0	0	0	0	0	0	0	0	0	0	0	Altered
P9	Female	63	Low	PD-1/PDL-1	1.9695	1	7.43333	NDB	0	0	0	0	0	0	0	0	0	0	0	0	0	0	0	0	0	0	0	0	0	0	0	0	0	0	0	0	0	0	0	Unaltered
P90	Male	15	High	PD-1/PDL-1	220.323	0	4.23333	NDB	1	1	0	1	0	0	0	0	0	0	0	0	0	0	0	1	1	0	1	0	0	0	1	0	0	1	1	0	0	0	0	Altered
P92	Male	46	Low	PD-1/PDL-1	6.255	1	0.766667	NDB	0	0	0	0	0	0	0	0	0	0	0	0	0	0	0	0	0	0	0	0	0	0	0	0	0	0	0	0	0	0	0	Unaltered
P93	Male	66	Low	PD-1/PDL-1	4.3543	1	1.86667	NDB	0	0	0	0	0	0	0	0	0	0	0	0	0	0	0	0	0	0	0	0	0	0	0	0	0	0	0	0	0	0	0	Unaltered
P94	Male	65	Low	PD-1/PDL-1	2.462	1	1.7	NDB	0	0	0	0	0	0	0	0	0	0	0	0	0	0	0	0	0	0	0	0	0	0	0	0	0	0	0	0	0	0	0	Unaltered
P95	Male	60	Low	PD-1/PDL-1	4.8559	1	3.8	NDB	0	0	0	0	0	0	0	0	0	0	0	0	0	0	0	0	0	0	0	0	0	0	0	0	0	0	0	0	0	0	0	Unaltered
P96	Female	47.9945	Low	PD-1/PDL-1	1.8834	1	9.13333	NDB	0	0	0	0	0	0	0	0	0	0	0	0	0	0	0	0	0	0	0	0	0	0	0	0	0	0	0	0	0	0	0	Unaltered
P97	Female	33.0822	Low	Combo	2.8711	1	5.7	NDB	0	0	0	0	0	0	0	0	0	0	0	0	0	0	0	0	0	0	0	0	0	0	0	0	0	0	0	0	0	0	0	Unaltered
P98	Male	70	Low	PD-1/PDL-1	2.7234	0	4.03333	NDB	0	1	0	0	0	0	0	0	0	0	0	0	0	0	0	0	0	0	0	0	0	0	0	0	0	0	0	0	0	0	0	Altered
P99	Male	66	Low	PD-1/PDL-1	2.7814	0	11.9667	DCB	0	0	0	0	0	0	0	0	0	0	0	0	0	0	0	0	0	0	0	0	0	0	0	0	0	0	0	0	0	0	0	Unaltered

## Sheet: S8 NSCLC_MSKCC_2018
Supplementary Table S8. Clinical information of patients in the NSCLC MSKCC 2018 cohort.
#1: Altered; 0: Unaltered
PATIENT_ID	SEX	AGE	DRUG_TYPE	CANCER_TYPE	TMB_NONSYNONYMOUS	PFS_STATUS	PFS_MONTHS	RECIST	BENEFIT	SMARCA4#	DPF3	SMARCD1	BCL11B	BICRA	SMARCA2	ARID1B	BICRAL	PBRM1	BCL11A	SMARCC1	ACTL6B	SMARCD2	ARID2	BRD9	SMARCB1	SMARCC2	ARID1A	PHF10	ACTB	ACTL6A	BCL7A	BCL7B	BCL7C	DPF1	DPF2	SMARCD3	SMARCE1	SS18	SS18L1	BRD7	SWI/SNF_Alteration(31genes)
nsclc_mskcc_2018p1	Female	70	Combo	Non-small cell lung cancer	2.06667	1	1.4127	PD	NCB	0	0	0	0	0	0	0	0	0	0	0	0	0	0	0	0	0	0	0	0	0	0	0	0	0	0	0	0	0	0	0	Unaltered
nsclc_mskcc_2018p10	Male	72	Combo	Non-small cell lung cancer	8.96667	1	5.4209	SD	NCB	0	1	1	0	0	0	0	0	0	0	0	0	0	0	0	0	0	0	0	0	0	0	0	0	0	0	0	0	0	0	0	Altered
nsclc_mskcc_2018p11	Female	58	Combo	Non-small cell lung cancer	1.06667	1	7.8193	SD	DCB	0	0	0	1	0	0	0	0	0	0	0	0	0	0	0	0	0	0	0	0	0	0	0	0	0	0	0	0	0	0	0	Altered
nsclc_mskcc_2018p12	Male	82	Combo	Non-small cell lung cancer	7.6	0	26.152	PR	DCB	0	0	0	0	0	0	0	0	0	0	0	0	0	0	0	0	0	0	0	0	0	0	0	0	0	0	0	0	0	0	0	Unaltered
nsclc_mskcc_2018p13	Male	76	Combo	Non-small cell lung cancer	1.9	1	23.9507	SD	DCB	0	0	0	0	0	0	0	0	0	0	0	0	0	0	0	0	0	0	0	0	0	0	0	0	0	0	0	0	0	0	0	Unaltered
nsclc_mskcc_2018p14	Female	43	Combo	Non-small cell lung cancer	1.9	1	1.6756	PD	NCB	0	0	0	0	0	0	0	0	0	0	0	0	0	0	0	0	0	0	0	0	0	0	0	0	0	0	0	0	0	0	0	Unaltered
nsclc_mskcc_2018p15	Female	53	Combo	Non-small cell lung cancer	7.5	0	0.0329	PD	NCB	0	0	0	0	0	0	0	0	0	0	0	0	0	0	0	0	0	0	0	0	0	0	0	0	0	0	0	0	0	0	0	Unaltered
nsclc_mskcc_2018p16	Male	67	Combo	Non-small cell lung cancer	0.733333	1	3.6468	SD	NCB	0	0	0	0	0	0	0	0	0	0	0	0	0	0	0	0	0	0	0	0	0	0	0	0	0	0	0	0	0	0	0	Unaltered
nsclc_mskcc_2018p17	Female	68	Combo	Non-small cell lung cancer	0.4	1	12.0903	SD	DCB	0	0	0	0	0	0	0	0	0	0	0	0	0	0	0	0	0	0	0	0	0	0	0	0	0	0	0	0	0	0	0	Unaltered
nsclc_mskcc_2018p18	Female	69	Combo	Non-small cell lung cancer	25.4	0	29.7331	PR	DCB	0	1	0	0	0	1	0	0	0	0	0	0	0	0	0	0	0	0	0	0	0	0	0	0	0	0	0	0	0	0	0	Altered
nsclc_mskcc_2018p19	Male	59	Combo	Non-small cell lung cancer	25.0333	0	28.7803	PR	DCB	0	0	0	0	0	0	1	1	1	0	0	0	0	0	0	0	0	0	0	0	0	0	0	0	0	0	0	0	0	0	0	Altered
nsclc_mskcc_2018p2	Male	72	Combo	Non-small cell lung cancer	7.36667	1	6.8008	PR	DCB	0	0	0	0	0	0	0	0	0	0	0	0	0	0	0	0	0	0	0	0	0	0	0	0	0	0	0	0	0	0	0	Unaltered
nsclc_mskcc_2018p20	Male	54	Combo	Non-small cell lung cancer	5.46667	1	1.4456	PD	NCB	0	0	0	0	0	0	0	0	0	1	0	0	0	0	0	0	0	0	0	0	0	0	0	0	0	0	0	0	0	0	0	Altered
nsclc_mskcc_2018p21	Female	74	Combo	Non-small cell lung cancer	9.8	0	21.5852	CR	DCB	0	0	0	0	0	0	1	0	0	0	0	0	0	0	0	0	0	0	0	0	0	0	0	0	0	0	0	0	0	0	0	Altered
nsclc_mskcc_2018p22	Male	72	Combo	Non-small cell lung cancer	4.46667	1	2.4969	PD	NCB	1	0	0	0	0	0	0	0	0	0	0	0	0	0	0	0	0	0	0	0	0	0	0	0	0	0	0	0	0	0	0	Altered
nsclc_mskcc_2018p23	Female	75	Combo	Non-small cell lung cancer	7.13333	1	7.9836	PR	DCB	0	0	0	0	0	0	0	0	0	0	0	0	0	0	0	0	0	0	0	0	0	0	0	0	0	0	0	0	0	0	0	Unaltered
nsclc_mskcc_2018p24	Female	85	Combo	Non-small cell lung cancer	1.46667	1	2.2669	PD	NCB	0	0	0	0	0	1	0	0	0	0	0	0	0	0	0	0	0	0	0	0	0	0	0	0	0	0	0	0	0	0	0	Altered
nsclc_mskcc_2018p25	Male	65	Combo	Non-small cell lung cancer	11.2	1	22.1437	SD	DCB	0	0	0	0	0	0	0	0	0	0	0	0	0	0	0	0	0	0	0	0	0	0	0	0	0	0	0	0	0	0	0	Unaltered
nsclc_mskcc_2018p26	Female	60	Combo	Non-small cell lung cancer	43.3	0	23	PR	DCB	0	0	0	0	0	0	0	0	0	0	0	0	0	1	1	0	0	0	0	0	0	0	0	0	0	0	0	0	0	0	0	Altered
nsclc_mskcc_2018p27	Male	55	Combo	Non-small cell lung cancer	5.73333	1	4.1068	SD	NCB	0	0	0	0	0	0	0	0	0	0	0	0	0	0	0	0	0	0	0	0	0	0	0	0	0	0	0	0	0	0	0	Unaltered
nsclc_mskcc_2018p28	Female	77	Combo	Non-small cell lung cancer	5.7	1	17.0513	SD	DCB	0	0	0	1	0	1	0	0	0	0	0	0	0	0	0	0	1	0	0	0	0	0	0	0	0	0	0	0	0	0	0	Altered
nsclc_mskcc_2018p29	Female	50	Combo	Non-small cell lung cancer	14.6333	1	2.5955	PD	NCB	0	0	0	0	0	0	0	0	0	0	0	0	0	0	0	0	0	1	0	0	0	0	0	0	0	0	0	0	0	0	0	Altered
nsclc_mskcc_2018p3	Female	61	Combo	Non-small cell lung cancer	0.366667	0	1.4784	SD	NCB	0	0	0	0	0	0	0	0	0	0	0	0	0	0	0	0	0	0	0	0	0	0	0	0	0	0	0	0	0	0	0	Unaltered
nsclc_mskcc_2018p30	Male	75	Combo	Non-small cell lung cancer	6.8	0	21.191	PR	DCB	0	0	0	0	0	0	0	0	0	0	0	0	0	0	0	0	0	1	0	0	0	0	0	0	0	0	0	0	0	0	0	Altered
nsclc_mskcc_2018p31	Female	67	Combo	Non-small cell lung cancer	5.7	1	2.3326	PD	NCB	0	0	0	1	0	0	0	0	0	0	0	0	0	0	0	0	0	0	0	0	0	0	0	0	0	0	0	0	0	0	0	Altered
nsclc_mskcc_2018p32	Female	50	Combo	Non-small cell lung cancer	12.6	0	18.9897	CR	DCB	0	0	0	0	0	0	0	0	0	0	0	0	0	0	0	0	0	0	0	0	0	0	0	0	0	0	0	0	0	0	0	Unaltered
nsclc_mskcc_2018p33	Male	74	Combo	Non-small cell lung cancer	11.0667	0	21.6181	PR	DCB	1	0	0	1	0	0	0	0	0	0	0	0	0	0	0	0	0	0	0	0	0	0	0	0	0	0	0	0	0	0	0	Altered
nsclc_mskcc_2018p34	Male	76	Combo	Non-small cell lung cancer	1.16667	0	22.34	PR	DCB	0	0	0	0	0	0	0	0	0	0	0	0	0	0	0	0	0	0	0	0	0	0	0	0	0	0	0	0	0	0	0	Unaltered
nsclc_mskcc_2018p35	Female	66	Combo	Non-small cell lung cancer	2.7	1	2.3326	PD	NCB	0	0	0	0	0	0	0	0	0	0	0	0	0	0	0	0	0	0	0	0	0	0	0	0	0	0	0	0	0	0	0	Unaltered
nsclc_mskcc_2018p36	Female	62	Combo	Non-small cell lung cancer	3.26667	1	13.3388	SD	DCB	0	0	0	0	0	0	0	0	0	0	0	0	0	0	0	0	0	0	0	0	0	0	0	0	0	0	0	0	0	0	0	Unaltered
nsclc_mskcc_2018p37	Female	57	Combo	Non-small cell lung cancer	6.36667	0	19.0226	PR	DCB	0	0	0	0	0	0	0	0	0	0	0	0	0	0	0	0	0	0	0	0	0	0	0	0	0	0	0	0	0	0	0	Unaltered
nsclc_mskcc_2018p38	Male	66	Combo	Non-small cell lung cancer	4.7	1	7.8193	PR	DCB	0	0	0	0	0	0	0	0	0	0	0	0	0	0	0	0	0	0	0	0	0	0	0	0	0	0	0	0	0	0	0	Unaltered
nsclc_mskcc_2018p39	Female	68	Combo	Non-small cell lung cancer	0.366667	0	0.03	NE	NCB	0	0	0	0	0	0	0	0	0	0	0	0	0	0	0	0	0	0	0	0	0	0	0	0	0	0	0	0	0	0	0	Unaltered
nsclc_mskcc_2018p40	Male	73	Combo	Non-small cell lung cancer	9.86667	1	8.115	PR	DCB	0	0	0	0	0	0	0	0	0	0	0	0	0	0	0	0	0	0	0	0	0	0	0	0	0	0	0	0	0	0	0	Unaltered
nsclc_mskcc_2018p41	Male	53	Combo	Non-small cell lung cancer	30.0333	0	13.5359	CR	DCB	0	0	0	0	0	0	0	0	0	0	0	1	0	0	0	0	0	1	0	0	0	0	0	0	0	0	0	0	0	0	0	Altered
nsclc_mskcc_2018p42	Male	59	Combo	Non-small cell lung cancer	0.6	1	3.9425	SD	NCB	0	0	0	0	0	0	0	0	0	0	0	0	0	0	0	0	0	0	0	0	0	0	0	0	0	0	0	0	0	0	0	Unaltered
nsclc_mskcc_2018p43	Female	58	Combo	Non-small cell lung cancer	8.76667	1	5.0924	SD	NCB	0	0	0	0	0	0	0	0	0	0	0	0	0	0	0	0	0	0	0	0	0	0	0	0	0	0	0	0	0	0	0	Unaltered
nsclc_mskcc_2018p44	Male	63	Combo	Non-small cell lung cancer	4.76667	1	0.3285	NE	NCB	0	0	0	0	0	0	0	0	0	0	0	0	0	0	0	0	0	0	0	0	0	0	0	0	0	0	0	0	0	0	0	Unaltered
nsclc_mskcc_2018p45	Male	56	Combo	Non-small cell lung cancer	4.9	1	2.2341	NE	NCB	0	0	0	0	0	0	0	0	0	0	0	0	0	0	0	0	0	0	0	0	0	0	0	0	0	0	0	0	0	0	0	Unaltered
nsclc_mskcc_2018p46	Male	69	Combo	Non-small cell lung cancer	11.5667	1	3.3183	SD	NCB	0	0	0	0	0	0	0	0	0	0	0	0	0	0	0	0	0	0	0	0	0	0	0	0	0	0	0	0	0	0	0	Unaltered
nsclc_mskcc_2018p47	Male	66	Combo	Non-small cell lung cancer	23.2667	1	2.1027	PD	NCB	1	1	0	0	0	0	0	0	0	0	0	0	0	0	0	0	0	0	0	0	0	0	0	0	0	0	0	0	0	0	0	Altered
nsclc_mskcc_2018p48	Male	51	Combo	Non-small cell lung cancer	4	0	2.2998	SD	NCB	0	0	0	0	0	0	0	0	0	0	0	0	0	0	0	0	0	0	0	0	0	0	0	0	0	0	0	0	0	0	0	Unaltered
nsclc_mskcc_2018p49	Female	55	Combo	Non-small cell lung cancer	3.53333	1	11.6632	SD	DCB	1	0	0	0	0	0	0	0	0	0	0	0	0	0	0	0	0	0	0	0	0	0	0	0	0	0	0	0	0	0	0	Altered
nsclc_mskcc_2018p5	Male	57	Combo	Non-small cell lung cancer	4.66667	1	7.5565	SD	DCB	0	0	0	0	0	0	0	0	0	0	0	0	0	0	0	0	0	0	0	0	0	0	0	0	0	0	0	0	0	0	0	Unaltered
nsclc_mskcc_2018p50	Male	63	Combo	Non-small cell lung cancer	5.73333	1	10.6119	SD	DCB	0	0	0	0	0	0	0	0	0	0	0	0	0	0	0	0	0	0	0	0	0	0	0	0	0	0	0	0	0	0	0	Unaltered
nsclc_mskcc_2018p51	Female	56	Combo	Non-small cell lung cancer	46.0667	0	29.9302	PR	DCB	0	1	0	0	0	0	0	0	0	0	0	0	0	0	0	0	0	0	0	0	0	0	0	0	0	0	0	0	0	0	0	Altered
nsclc_mskcc_2018p52	Male	67	Combo	Non-small cell lung cancer	5.93333	0	30.3244	PR	DCB	0	0	0	0	1	0	0	0	0	0	0	0	0	0	0	0	0	0	0	0	0	0	0	0	0	0	0	0	0	0	0	Altered
nsclc_mskcc_2018p53	Female	46	Combo	Non-small cell lung cancer	8.66667	1	1.3799	PD	NCB	1	0	0	0	0	0	0	0	0	0	0	0	0	0	0	0	0	0	0	0	0	0	0	0	0	0	0	0	0	0	0	Altered
nsclc_mskcc_2018p54	Female	42	Combo	Non-small cell lung cancer	12.6667	1	5.1581	SD	NCB	0	0	0	0	0	0	0	0	0	0	0	0	0	0	0	0	0	0	0	0	0	0	0	0	0	0	0	0	0	0	0	Unaltered
nsclc_mskcc_2018p55	Male	71	Combo	Non-small cell lung cancer	6.83333	1	2.1027	PD	NCB	0	0	0	0	0	0	0	0	0	0	0	0	0	0	0	0	0	0	0	0	0	0	0	0	0	0	0	0	0	0	0	Unaltered
nsclc_mskcc_2018p56	Female	63	Combo	Non-small cell lung cancer	5.9	1	6.5051	SD	DCB	0	0	0	1	0	0	0	0	0	0	0	0	0	0	0	0	0	0	0	0	0	0	0	0	0	0	0	0	0	0	0	Altered
nsclc_mskcc_2018p57	Female	61	Combo	Non-small cell lung cancer	4.43333	1	2.037	PD	NCB	0	0	0	0	0	0	0	0	0	0	0	0	0	0	0	0	0	0	0	0	0	0	0	0	0	0	0	0	0	0	0	Unaltered
nsclc_mskcc_2018p58	Female	56	Combo	Non-small cell lung cancer	5.06667	1	1.8727	NE	NCB	0	0	0	0	0	0	0	0	0	0	1	0	0	0	0	0	0	0	0	0	0	0	0	0	0	0	0	0	0	0	0	Altered
nsclc_mskcc_2018p59	Female	56	Combo	Non-small cell lung cancer	1.66667	1	2.3326	PD	NCB	0	0	0	0	0	0	0	0	0	0	0	0	0	0	0	0	0	0	0	0	0	0	0	0	0	0	0	0	0	0	0	Unaltered
nsclc_mskcc_2018p6	Female	67	Combo	Non-small cell lung cancer	1.86667	1	3.7125	SD	NCB	1	0	0	0	0	0	0	0	0	0	0	0	0	0	0	0	0	0	0	0	0	0	0	0	0	0	0	0	0	0	0	Altered
nsclc_mskcc_2018p60	Female	73	Combo	Non-small cell lung cancer	49.1	0	24.3121	PR	DCB	1	0	0	0	0	1	1	0	0	0	0	1	1	0	0	0	0	0	0	0	0	0	0	0	0	0	0	0	0	0	0	Altered
nsclc_mskcc_2018p61	Male	72	Combo	Non-small cell lung cancer	18.6333	1	1.7084	NE	NCB	0	0	0	0	0	0	0	0	0	0	0	0	0	0	0	0	0	0	0	0	0	0	0	0	0	0	0	0	0	0	0	Unaltered
nsclc_mskcc_2018p62	Male	87	Combo	Non-small cell lung cancer	49.9	1	22.9979	PR	DCB	1	0	0	0	0	0	0	0	0	0	0	0	0	1	0	1	0	0	0	0	0	0	0	0	0	0	0	0	0	0	0	Altered
nsclc_mskcc_2018p63	Male	75	Combo	Non-small cell lung cancer	0.566667	0	21.8809	PR	DCB	0	0	0	0	0	0	0	0	0	0	0	0	0	0	0	0	0	0	0	0	0	0	0	0	0	0	0	0	0	0	0	Unaltered
nsclc_mskcc_2018p64	Female	74	Combo	Non-small cell lung cancer	0.866667	0	20.0411	PR	DCB	0	0	0	0	0	0	0	0	0	0	0	0	0	0	0	0	0	0	0	0	0	0	0	0	0	0	0	0	0	0	0	Unaltered
nsclc_mskcc_2018p65	Female	69	Combo	Non-small cell lung cancer	1.66667	0	4.7639	SD	NCB	0	0	0	0	0	0	0	0	0	0	0	0	0	0	0	0	0	0	0	0	0	0	0	0	0	0	0	0	0	0	0	Unaltered
nsclc_mskcc_2018p66	Male	76	Combo	Non-small cell lung cancer	7.33333	0	0.0329	NE	NCB	0	0	0	0	0	0	0	0	0	0	0	0	0	0	0	0	0	0	0	0	0	0	0	0	0	0	0	0	0	0	0	Unaltered
nsclc_mskcc_2018p67	Female	71	Combo	Non-small cell lung cancer	1.6	1	2.5298	PD	NCB	0	0	0	0	0	0	0	0	0	0	0	0	0	0	0	0	0	0	0	0	0	0	0	0	0	0	0	0	0	0	0	Unaltered
nsclc_mskcc_2018p68	Male	61	Combo	Non-small cell lung cancer	16.8333	1	7.9507	SD	DCB	1	0	0	0	0	0	0	0	0	0	0	1	0	0	0	0	0	0	0	0	0	0	0	0	0	0	0	0	0	0	0	Altered
nsclc_mskcc_2018p69	Female	67	Combo	Non-small cell lung cancer	2.03333	1	2.6283	PD	NCB	0	0	0	0	0	0	1	0	0	0	0	0	0	0	0	0	0	0	0	0	0	0	0	0	0	0	0	0	0	0	0	Altered
nsclc_mskcc_2018p7	Male	56	Combo	Non-small cell lung cancer	8	0	38.6037	PR	DCB	0	0	0	0	0	0	0	0	0	0	0	0	0	0	0	0	0	0	0	0	0	0	0	0	0	0	0	0	0	0	0	Unaltered
nsclc_mskcc_2018p70	Male	83	Combo	Non-small cell lung cancer	9.83333	1	1.2813	NE	NCB	0	0	0	0	0	0	0	0	0	0	0	0	0	0	0	0	0	0	0	0	0	0	0	0	0	0	0	0	0	0	0	Unaltered
nsclc_mskcc_2018p71	Female	71	Combo	Non-small cell lung cancer	0.866667	1	3.5154	SD	NCB	0	0	0	0	0	0	0	0	0	0	0	0	0	0	0	0	0	0	0	0	0	0	0	0	0	0	0	0	0	0	0	Unaltered
nsclc_mskcc_2018p72	Male	47	Combo	Non-small cell lung cancer	0.8	1	2.2998	PD	NCB	0	0	0	0	0	0	0	0	0	0	0	0	0	0	0	0	0	0	0	0	0	0	0	0	0	0	0	0	0	0	0	Unaltered
nsclc_mskcc_2018p73	Female	57	Combo	Non-small cell lung cancer	39.6	0	16.46	PR	DCB	0	0	0	0	1	0	0	0	0	0	0	0	0	0	0	0	0	0	0	0	0	0	0	0	0	0	0	0	0	0	0	Altered
nsclc_mskcc_2018p74	Male	42	Combo	Non-small cell lung cancer	23.2667	1	7.9836	SD	DCB	0	0	0	0	0	0	0	0	0	0	0	0	0	0	0	0	1	0	1	0	0	0	0	0	0	0	0	0	0	0	0	Altered
nsclc_mskcc_2018p75	Female	51	Combo	Non-small cell lung cancer	12.9667	0	14.883	CR	DCB	1	0	0	0	0	0	0	0	0	0	0	0	0	0	0	0	0	0	0	0	0	0	0	0	0	0	0	0	0	0	0	Altered
nsclc_mskcc_2018p8	Male	58	Combo	Non-small cell lung cancer	5.7	1	2.9897	SD	NCB	0	0	0	0	0	0	0	0	0	0	0	0	0	0	0	0	0	0	0	0	0	0	0	0	0	0	0	0	0	0	0	Unaltered
nsclc_mskcc_2018p9	Female	68	Combo	Non-small cell lung cancer	2.9	1	7.7536	SD	DCB	0	0	0	0	0	0	0	0	0	0	0	0	0	0	0	0	0	0	0	0	0	0	0	0	0	0	0	0	0	0	0	Unaltered

## Sheet: S9 alteration frequency by gene
Supplementary Table S9. The alteration frequency of each gene in the SWI/SNF complex in TCGA primary tumors.
Gene	Frequncy (%)
ARID1A	8.27944
PBRM1	4.22983
ARID2	4.13442
SMARCA4	3.97541
ARID1B	3.38174
SMARCA2	2.72448
BCL11A	2.21563
SMARCC2	1.9612
BCL11B	1.63257
BICRAL	1.50535
SMARCC1	1.47355
BRD7	1.28273
ACTB	1.19792
BICRA	1.13432
DPF3	1.10251
ACTL6B	1.04951
SMARCB1	0.901092
BRD9	0.848087
SMARCD2	0.816283
DPF2	0.805682
ACTL6A	0.742076
SMARCD3	0.699671
SMARCD1	0.68907
PHF10	0.68907
SS18	0.657267
SMARCE1	0.646666
SS18L1	0.604262
DPF1	0.593661
BCL7C	0.466448
BCL7A	0.39224
BCL7B	0.243825

## Sheet: S10 alteration frequency cancer
Supplementary Table S10. The alteration frequency of the SWI/SNF complex in TCGA primary tumors.
Cancer type (#)	Frequncy (%)
UCEC (513)	59.2593
SKCM (465)	56.5591
BLCA (402)	55.9701
DLBC (37)	51.3514
KIRC (356)	48.8764
CHOL (36)	44.4444
STAD (398)	42.7136
LUAD (506)	41.1067
COAD (390)	38.2051
LUSC (468)	35.8974
LIHC (355)	31.5493
CESC (283)	26.8551
ESCA (181)	25.9669
HNSC (493)	25.355
KIRP (275)	25.0909
UCS (57)	22.807
READ (137)	21.8978
LGG (509)	15.3242
BRCA (1006)	14.7117
OV (204)	12.7451
SARC (231)	11.2554
MESO (82)	9.7561
PAAD (153)	8.49673
GBM (149)	8.05369
ACC (78)	7.69231
PRAD (492)	7.52033
THYM (119)	5.88235
THCA (485)	4.12371
LAML (122)	4.09836
UVM (80)	3.75
KICH (65)	3.07692
TGCT (128)	1.5625
PCPG (178)	1.1236

[truncated: 2 more sheets: S11 frequency by gene&cancer, S12 TMB_MSKCC_2018_multi_Cox]
